# Supplementary material for: Multiple time-scales of decision-making in the hippocampus and prefrontal cortex
Source: eLife. 2021 Mar 8;10:e66227. doi: 10.7554/eLife.66227 (PMC7993991; doi:10.7554/eLife.66227)
Supplement: Figure 1—source data 1. — Each row represents a session from one animal. [file elife-66227-fig1-data1.xlsx]

## Sheet: DecodingAccuracy_PFC(OUT)
Location bin (cm)
19	27	35	43	51	59	67	75	83	91	99	107	115	123	131	139	147	155	163	171	179
1	0.941176	1	0.909091	0.857143	0.875	0.801587	0.877578	0.654849	0.616314	0.656191	0.695135	0.689752	0.662366	0.66174	0.706835	0.659757	0.676681	0.690972	0.599865	0.722403
0.888393	0.882448	0.791184	0.846707	0.812157	0.780917	0.77498	0.719309	0.738188	0.88875	0.838235	0.860294	0.969006	0.803226	0.949875	0.887464	0.944872	0.929167	0.985294	0.912879	0.923729
0.772904	0.784333	0.75817	0.729532	0.767521	0.825608	0.78022	0.788377	0.671807	0.754097	0.758803	0.828012	0.847843	0.800631	0.931818	0.793589	0.701049	0.735893	0.857971	0.84902	0.970588
0.71345	0.682904	0.672348	0.650689	0.683766	0.589726	0.728162	0.62013	0.668697	0.863657	0.849261	0.98	0.855237	0.734618	0.844444	0.84107	0.864253	0.838542	0.873992	0.889881	0.803922
0.811772	0.719231	0.668762	0.71875	0.767094	0.646356	0.693274	0.781762	0.74929	0.794988	0.864438	0.925549	0.896978	0.871429	0.860714	0.911111	0.920163	0.79416	0.81	0.840909	0.882353
0.775	0.734375	0.758553	0.6931	0.690283	0.740122	0.75	0.811603	0.697577	0.776907	0.916761	0.935133	0.910784	0.813025	0.908088	0.876471	0.937143	0.861227	0.886574	0.796654	0.785354
0.888393	0.882448	0.791184	0.846707	0.812157	0.780917	0.77498	0.719309	0.738188	0.88875	0.838235	0.860294	0.969006	0.803226	0.949875	0.887464	0.944872	0.929167	0.985294	0.912879	0.923729
0.71345	0.682904	0.672348	0.650689	0.683766	0.589726	0.728162	0.62013	0.668697	0.863657	0.849261	0.98	0.855237	0.734618	0.844444	0.84107	0.864253	0.838542	0.873992	0.889881	0.803922
0.702255	0.691214	0.730491	0.588235	0.65188	0.714286	0.776977	0.669856	0.703578	0.854788	0.880233	0.940526	0.885185	0.760204	0.815508	0.79	0.804926	0.785326	0.82967	0.886364	0.830357
0.924444	0.9125	0.831169	0.689935	0.789037	0.680147	0.786765	0.710351	0.771185	0.862849	0.85506	0.888091	0.839894	0.818069	0.951111	0.861409	0.908095	0.877252	0.925926	0.986111	0.933036
0.740113	0.732252	0.650932	0.564103	0.564171	0.597619	0.632196	0.84127	0.741291	0.886364	0.857061	0.852132	0.71559	0.800403	0.821429	0.903974	0.784091	0.892857	0.833333	0.780556	0.847222
0.769048	0.7	0.62836	0.705	0.724324	0.695	0.663227	0.678403	0.794118	0.871926	0.899653	0.955556	0.943461	0.925551	0.977778	0.898965	0.89039	0.983333	1	0.944444	0.973684
0.753788	0.675926	0.734144	0.5938	0.594877	0.692698	0.782828	0.783835	0.766733	0.800905	0.931507	0.86707	0.926494	1	0.961538	0.885281	0.965116	0.917655	0.951357	1	1
0.767905	0.629953	0.612216	0.798485	0.714815	0.770833	0.830827	0.548764	0.748599	0.757685	0.935417	0.970588	1	0.958333	0.961312	0.97	0.962121	0.958333	0.97619	1	1
0.748433	0.6875	0.733333	0.651515	0.719662	0.5625	0.775253	0.716795	0.715	0.873397	0.930526	0.99	0.951613	1	0.953742	0.951389	0.884259	1	0.925	0.979167	0.966667
0.559524	0.650635	0.728507	0.774711	0.645098	0.860837	0.883333	0.682589	0.666667	0.845569	0.925647	0.93925	0.876907	0.883333	0.940581	0.850594	0.925167	0.934524	0.923851	1	0.961538
0.470885	0.714286	0.644231	0.613636	0.59	0.7	0.568966	0.536458	0.370455	0.515169	0.56238	0.661667	0.541353	0.541173	0.543605	0.606324	0.642408	0.504264	0.595142	0.59	0.50463
0.451356	0.452374	0.514903	0.45614	0.650136	0.594318	0.636329	0.451238	0.591071	0.585731	0.735054	0.725626	0.597985	0.657895	0.533499	0.491975	0.565122	0.661765	0.570899	0.75431	0.644397
0.498403	0.41677	0.547881	0.600954	0.479441	0.450649	0.610227	0.712963	0.527992	0.451922	0.615477	0.535061	0.688442	n/a	0.558824	0.515873	0.5625	0.534702	0.518182	0.543103	0.438889
0.504095	0.555288	0.601042	0.362069	0.484578	0.447814	0.511417	0.411734	0.592857	0.466094	0.546429	0.634738	0.5605	0.424663	0.329457	0.516469	0.661337	0.530631	0.654605	0.544118	0.637993
0.55848	0.547103	0.519397	0.607558	0.445455	0.427083	0.754399	0.541667	0.59893	0.37803	0.534625	0.634881	0.556557	0.421569	0.652381	0.72619	0.625712	0.625	0.75641	0.76087	0.541667
0.559454	0.583724	0.733333	0.596296	0.545673	0.580128	0.583243	0.527778	0.243704	0.570899	0.504662	0.582558	0.292735	0.475806	0.621905	0.544028	0.436869	0.698333	0.6775	0.443478	0.666667
0.57177	0.593478	0.644444	0.688988	0.629588	0.629677	0.632258	0.629239	0.453081	0.55	0.456957	0.55	0.369032	0.2625	0.675157	0.649131	0.622596	0.645186	0.742105	0.58625	0.777778
0.470833	0.618774	0.498922	0.538571	0.522727	0.680556	0.577061	0.643236	0.527852	0.512759	0.44966	0.508538	0.6875	0.57	0.581429	0.812394	0.758333	0.861111	0.677941	0.348485	n/a
0.552941	0.716793	0.564103	0.652941	0.485112	0.490957	0.541667	0.565955	0.663502	0.470339	0.68623	0.591667	0.603175	0.60628	0.533698	0.587119	0.574084	0.480189	0.507216	0.554157	0.535088
0.530303	0.549442	0.651515	0.543478	0.559456	0.598684	0.587302	0.506695	0.75	0.652707	0.779459	0.674731	0.76673	0.670027	0.706428	0.792711	0.721053	0.630029	0.685556	0.766103	0.490683
0.581038	0.546366	0.54691	0.565126	0.614583	0.527644	0.598214	0.639684	0.649083	0.551471	0.635075	0.663594	0.803114	0.683333	0.75424	0.718013	0.663393	0.580882	0.591432	0.637778	0.665012
0.560923	0.574405	0.550739	0.563122	0.612568	0.453008	0.566651	0.677563	0.568753	0.442045	0.65468	0.603977	0.682143	0.750165	0.685185	0.766667	0.659341	0.532143	0.529433	0.651648	0.603598
0.49274	0.541958	0.574697	0.534456	0.490431	0.663286	0.583333	0.57921	0.576609	0.501894	0.601562	0.632353	0.690537	0.788051	0.712302	0.76334	0.697581	0.681784	0.739496	0.651442	0.606602
0.497657	0.517853	0.553708	0.679487	0.572727	0.541973	0.630541	0.662671	0.589346	0.690015	0.777626	0.651969	0.671429	0.564453	0.704545	0.820381	0.699605	0.511722	0.424289	0.580909	0.578675
0.468192	0.563348	0.588209	0.626984	0.65051	0.589603	0.590625	0.713471	0.699074	0.648962	0.658124	0.709253	0.753788	0.538816	0.759524	0.626854	0.639286	0.549627	0.431231	0.46087	0.678571
0.637755	0.594608	0.585003	0.576923	0.636116	0.662757	0.524554	0.554967	0.72988	0.754253	0.718831	0.675544	0.617857	0.489356	0.626067	0.639342	0.440074	0.626048	0.615207	0.638621	0.782738
0.794118	0.652778	0.407563	0.368421	0.511111	0.25	0.547835	0.540805	0.575314	0.61756	0.64297	0.748045	0.613702	0.614686	0.673595	0.691288	0.68794	0.655047	0.7625	0.702353	0.78051
0.63694	0.698052	0.697712	0.539216	0.375	0.285714	0.511574	0.591519	0.655964	0.862709	0.756854	0.738095	0.699597	0.762127	0.644673	0.635362	0.838562	0.859355	0.721528	0.816288	0.957447
0.51087	0.466063	0.578947	0.682692	0.782232	0.396856	0.669377	0.577179	0.702325	0.584991	0.657604	0.688691	0.5825	0.740929	0.700403	0.72125	0.740891	0.75641	0.689076	0.765686	0.65942
0.597851	0.578733	0.702381	0.596154	0.542986	0.584128	0.569726	0.48397	0.56321	0.686206	0.697715	0.719231	0.735755	0.579487	0.803544	0.746738	0.709091	0.808846	0.758333	0.832143	0.546188
0.557018	0.436966	0.565897	0.675595	0.559846	0.514286	0.664286	0.625028	0.565671	0.667582	0.664391	0.772727	0.808938	0.888889	0.781134	0.74181	0.781513	0.714554	0.70749	0.619565	0.651754
0.573113	0.588596	0.621622	0.675926	0.683333	0.708333	0.622847	0.72381	0.641742	0.740909	0.75752	0.707692	0.707317	0.77931	0.802439	0.796537	0.925034	0.703947	0.794892	0.821875	0.828571
0.641819	0.667423	0.573423	0.65	0.650856	0.546939	0.529533	0.53003	0.809515	0.778861	0.730392	0.77963	0.665972	0.86875	0.840259	0.756853	0.862567	0.858804	0.752315	0.503158	0.573427
0.691362	0.679762	0.491015	0.520963	0.58867	0.477273	0.594494	0.522051	0.592559	0.585503	0.555556	0.727367	0.529859	0.818015	0.775013	0.73211	0.662678	0.687158	0.747024	0.669279	0.647629
0.8	1	0.75	0.625	0.5625	0.838235	0.779966	0.520105	0.584771	0.580415	0.650493	0.683014	0.592218	0.717453	0.64108	0.68742	0.579218	0.650338	0.708995	0.475936	0.692929
0.598856	0.572222	0.551592	0.58818	0.681643	0.591935	0.535404	0.552353	0.449911	0.613881	0.621171	0.712893	0.729675	0.6275	0.62461	0.695076	0.75566	0.560588	0.752586	0.768617	0.833333
0.618182	0.606191	0.635568	0.499298	0.559345	0.613761	0.496803	0.483399	0.574651	0.654887	0.782242	0.82998	0.885417	0.759337	0.730159	0.670266	0.735053	0.818769	0.74	0.78953	0.850427
0.473286	0.534363	0.651584	0.592105	0.524242	0.4886	0.526772	0.510753	0.576851	0.542977	0.637843	0.784736	0.756944	0.436364	0.711989	0.638221	0.621371	0.61943	0.61641	0.724359	0.598611
0.468653	0.563768	0.641707	0.479002	0.630981	0.555245	0.488872	0.390408	0.552974	0.579126	0.61337	0.628199	0.486842	0.567708	0.640999	0.7025	0.629594	0.499593	0.635714	0.536055	0.638095
0.549553	0.527448	0.622555	0.467315	0.55467	0.546429	0.569179	0.596842	0.618363	0.670442	0.581207	0.529612	0.639439	0.560089	0.630077	0.646715	0.575984	0.572441	0.560867	0.595824	0.611
0.561924	0.587273	0.658963	0.68438	0.592262	0.671484	0.592912	0.672059	0.583296	0.635047	0.664191	0.598519	0.578463	0.684807	0.669415	0.592602	0.611111	0.689394	0.811293	0.605263	0.553571
0.525376	0.594444	0.446154	0.631818	0.555861	0.57	0.53562	0.542714	0.596827	0.60321	0.502948	0.57275	0.561354	0.558161	0.647593	0.604762	0.615784	0.621429	0.660465	0.683013	0.666667
0.388889	0.566667	0.568254	0.465517	0.601894	0.671569	0.684028	0.738095	0.617198	0.708123	0.734524	0.771291	0.694983	0.677631	0.851856	0.877808	0.820476	0.875	0.745573	0.780428	0.707309
0.709513	0.65653	0.600096	0.577703	0.673977	0.64668	0.641369	0.736486	0.653646	0.873275	0.858788	0.857143	0.790692	0.758211	0.849099	0.892597	0.861166	0.768462	0.851507	0.739775	0.78244
0.697674	0.739596	0.668393	0.657095	0.602165	0.733193	0.627984	0.730458	0.691755	0.887497	0.941851	0.916264	0.883838	0.886318	0.951136	0.987179	0.915909	0.860136	0.818151	0.803175	0.897321
0.731151	0.694924	0.605454	0.623658	0.633871	0.601064	0.72169	0.789899	0.83569	0.896138	0.928419	0.820362	0.914411	0.87234	0.975	0.9125	0.798295	0.862578	0.868946	0.899267	0.763889
0.78	0.712284	0.727949	0.689663	0.664706	0.635577	0.594547	0.592248	0.690476	0.839202	0.873932	0.892461	0.885294	0.744062	0.938235	0.795219	0.785418	0.838235	0.881609	0.883929	0.83046
0.826407	0.80491	0.676257	0.4942	0.512673	0.593985	0.760714	0.777778	0.875375	0.873397	0.920084	0.936741	0.873823	1	0.944444	0.775041	0.753103	0.817837	0.909091	0.916534	0.714286
0.629167	0.58637	0.640808	0.610865	0.563724	0.596586	0.746059	0.724075	0.8233	0.849981	0.937331	0.904167	0.718474	1	0.965517	0.913434	0.841576	0.860022	0.863711	0.733431	0.635338
0.666667	0.729197	0.664137	0.653425	0.744258	0.713249	0.790517	0.790179	0.882992	0.83951	0.748198	0.800682	0.645914	0.75	0.874703	0.886054	0.936012	0.829327	0.930127	0.836232	1
0.507365	0.675	0.544818	0.596817	0.456328	0.483333	0.421452	0.402778	0.544271	0.417989	0.574405	0.723897	0.587287	0.521339	0.592623	0.543775	0.600135	0.586726	0.537448	0.627845	0.597306
0.602309	0.687719	0.522849	0.550926	0.511306	0.697277	0.480549	0.429852	0.560903	0.597863	0.536165	0.545109	0.602469	0.565382	0.633403	0.685444	0.610227	0.547115	0.569231	0.500676	0.52381
0.566625	0.553895	0.555296	0.570755	0.479615	0.564744	0.460179	0.532086	0.57	0.558594	0.472172	0.498736	0.550135	0.438269	0.469231	0.57359	0.505129	0.622043	0.579496	0.726489	0.665012
0.663889	0.589827	0.581026	0.624151	0.629231	0.71645	0.683784	0.618479	0.5926	0.500778	0.545827	0.548026	0.484694	0.557184	0.770833	0.698123	0.627132	0.50372	0.547315	0.535714	0.775
0.703104	0.53491	0.685714	0.597826	0.576531	0.659642	0.581418	0.592754	0.539065	0.618985	0.668459	0.568254	0.78254	0.584387	0.391521	0.615522	0.615149	0.595938	0.413462	0.577922	0.595423
0.502101	0.523611	0.4375	0.730331	0.7	0.799569	0.603125	0.516049	0.5	0.493966	0.530303	0.673077	0.516781	0.487288	0.617424	0.64331	0.673077	0.656832	0.723977	0.520833	0.6875
0.634793	0.661458	0.487548	0.50282	0.546154	0.553613	0.519231	0.489167	0.585714	0.734127	0.553571	0.613587	0.733511	0.709921	0.733333	0.782051	0.525068	0.549231	0.601852	0.713333	0.554348
0.632933	0.606164	0.512288	0.547842	0.612795	0.744318	0.533405	0.522288	0.683537	0.676343	0.562698	0.648529	0.514632	0.546173	0.614583	0.562267	0.638221	0.708772	0.670745	0.539141	0.763158
0.785714	0.754878	0.939338	0.846154	0.722222	0.875	0.861111	0.94	0.661064	0.68199	0.77425	0.759028	0.827091	0.775568	0.749088	0.74698	0.843509	0.944283	0.87037	0.892463	0.890625
0.745643	0.78	0.768293	0.665007	0.648504	0.82619	0.878079	0.815735	0.779897	0.847755	0.856673	0.910256	0.909836	0.823805	0.844793	0.806195	0.889666	1	0.905556	0.933333	0.913919
0.738032	0.734865	0.696068	0.663095	0.67697	0.547101	0.759259	0.670255	0.714744	0.905952	0.883929	0.894211	0.873401	0.815431	0.90963	0.919067	0.94186	0.916667	0.93772	0.919444	0.879679
0.687493	0.767913	0.628571	0.622951	0.570238	0.527484	0.708333	0.618617	0.737422	0.949495	0.908163	0.953598	0.95082	0.782902	0.780506	0.921474	0.931481	1	0.924641	1	0.95119
0.77698	0.798622	0.791667	0.736677	0.648696	0.81746	0.723656	0.76348	0.709559	0.921086	0.912186	0.874242	0.90293	0.986486	0.990741	0.971429	0.918449	0.727273	0.852941	0.96	0.785714
0.605455	0.486479	0.516721	0.698105	0.693548	0.613027	0.682616	0.551507	0.633274	0.665293	0.798947	0.809163	0.686361	0.75	0.78486	0.865517	0.8875	0.941176	0.916667	1	1
0.634694	0.775219	0.759153	0.626543	0.801471	0.714744	0.766043	0.680877	0.639305	0.811569	0.9375	0.917368	0.853436	0.750962	0.919643	0.926729	0.863636	0.910714	0.785714	0.75	0.785714
0.585227	0.781075	0.681391	0.838235	0.710784	0.601948	0.757505	0.492888	0.683849	0.812611	0.916667	0.833333	0.879885	0.814764	0.789855	0.776087	0.780702	0.964286	0.816667	0.6875	0.934874
*Each row represents a session from one animal; n/a: insufficient spike counts and occupancy

## Sheet: DecodingAccuracy_PFC(IN)
Location bin (cm)
19	27	35	43	51	59	67	75	83	91	99	107	115	123	131	139	147	155	163	171	179
1	1	1	1	1	0.819196	0.833333	0.625	0.620082	0.761631	0.788393	0.798561	0.740352	0.6155	0.746463	0.708801	0.776939	0.6931	0.688394	0.669123	0.680845
0.773504	0.737037	0.904762	0.754464	0.741667	0.720397	0.772334	0.704762	0.853539	0.885621	0.793056	0.852814	0.879386	0.854012	0.842166	0.85696	0.875926	0.819913	0.790649	0.752206	0.751812
0.755952	0.792857	0.863636	0.715438	0.898739	0.903951	0.912879	0.929533	0.870105	0.937057	0.947332	0.976744	0.931818	0.903143	0.939815	0.936996	0.963528	0.811776	0.798266	0.760823	0.71875
0.829762	0.758772	0.838043	0.796296	0.9	0.85188	0.909091	1	0.844697	0.930926	0.821053	0.914244	0.933333	0.866241	0.806421	0.817931	0.908333	0.894282	0.907774	0.888889	0.852941
0.745	0.77	0.782738	0.744253	0.848485	0.864159	0.898319	0.818015	0.817857	0.889024	0.953488	0.895551	0.938095	0.941558	0.971429	0.885204	0.827778	0.90295	0.893665	0.892911	0.84375
0.779762	0.818452	0.723039	0.887556	0.955357	0.94	0.862237	0.944444	0.872622	0.925069	0.925893	0.913394	0.914634	0.986486	0.942708	0.933259	0.955039	0.915414	0.879234	0.893908	0.824974
0.650895	0.766176	0.914943	0.781513	0.822115	0.771552	0.791859	0.9	0.778232	0.841837	0.94035	0.917778	0.9	0.810674	0.902525	0.865716	0.887865	0.927053	0.869675	0.878755	0.907197
0.933333	0.870833	0.703947	0.785354	0.843506	0.618056	0.923851	0.714286	0.765804	0.78125	0.796474	0.761905	0.765152	0.742618	0.737892	0.747076	0.820833	0.704902	0.795956	0.829861	0.861111
0.625	0.875	0.8125	0.878205	0.9	0.751059	0.733894	0.671569	0.675027	0.774786	0.748607	0.753501	0.737836	0.720029	0.857298	0.798942	0.800395	0.801683	0.849937	0.691084	0.658408
0.746154	0.861111	0.818182	0.938889	0.795833	0.716537	0.760701	0.892857	0.818167	0.882334	0.935223	0.927579	0.898453	0.8216	0.851894	0.784351	0.864251	0.806977	0.802148	0.847727	0.740113
0.605769	0.702429	0.888571	0.954545	0.95	0.774621	0.831866	0.894444	0.75201	0.950588	0.926926	0.887363	0.818684	0.735952	0.784211	0.842172	0.819281	0.804766	0.812881	0.828399	0.713294
0.833732	0.695724	0.871053	0.837474	0.916118	0.899306	0.860095	0.934691	0.902143	0.909613	0.894444	0.925484	1	0.942641	0.912146	0.953463	0.923295	0.888571	0.855159	0.781309	0.612745
0.727941	0.722506	0.910606	0.842491	0.853704	0.817702	0.796657	0.9375	0.884593	0.943085	0.947778	0.970588	0.944444	0.933112	0.97	0.862471	0.928571	0.940476	0.916667	0.886058	0.911765
0.865325	0.849624	0.85	0.863487	0.87037	0.917708	0.885222	0.917774	0.931944	0.940476	0.92427	0.96633	0.96875	0.848377	0.982143	0.917143	0.862471	0.961538	0.784108	0.775338	0.810606
0.909091	0.9375	0.779762	0.941176	0.864583	0.942793	0.873276	0.893939	0.857032	0.880201	0.920131	0.908858	0.941667	0.86695	0.902381	0.933155	0.947742	0.965856	0.912963	0.859477	0.721408
0.8	0.803571	0.889091	0.813657	0.9375	0.939153	0.891818	0.896818	0.907486	0.928931	0.853233	0.886978	0.987805	0.979167	0.962963	0.978261	0.896994	0.894872	0.845938	0.767045	0.703896
0.584559	0.56993	0.735294	0.793333	0.847578	0.519231	0.658717	0.574324	0.611657	0.503546	0.642157	0.569777	0.503456	0.414286	0.459733	0.481061	0.511513	0.601786	0.527313	0.507937	0.547374
0.633065	0.569524	0.695286	0.583333	0.646724	0.602516	0.596629	0.466667	0.582605	0.502265	0.659073	0.702256	0.72	0.551471	0.578598	0.550735	0.657658	0.615942	0.578889	0.50873	0.514457
0.57	0.576293	0.721429	0.585227	0.437146	0.485854	0.620787	0.497967	0.525956	0.570034	0.610975	0.793159	0.513255	0.527273	0.685422	0.707576	0.638092	0.603735	0.576087	0.574045	0.446506
0.707681	0.680307	0.525	0.571556	0.602273	0.610777	0.652722	n/a	0.629157	0.596628	0.637391	0.549835	0.854167	0.552132	0.606019	0.733333	0.653226	0.631327	0.507828	0.544118	0.55686
0.70098	0.579365	0.674242	0.665476	0.605769	0.525434	0.651316	0.833333	0.427645	0.53488	0.648841	0.529533	0.535714	0.538528	0.689327	0.636905	0.479263	0.549235	0.566692	0.599432	0.479167
0.59913	0.545455	0.611111	0.517391	0.607647	0.433333	0.651515	0.515152	0.70557	0.625	0.382051	0.50339	0.631225	0.543074	0.673529	0.54798	0.589744	0.538509	0.501818	0.517356	0.6
0.619048	0.639815	0.590526	0.600791	0.497896	0.607143	0.681818	0.566423	0.50679	0.647778	0.608491	0.652632	0.563753	0.711321	0.604978	0.61899	0.525955	0.631532	0.57629	0.595588	0.722222
0.684641	0.716387	0.675466	0.675	0.493939	0.631579	0.785714	0.679487	0.589286	0.561186	0.659544	0.631579	0.579861	0.55	0.672811	0.720238	0.543571	0.595735	0.575366	0.528125	n/a
0.513932	0.426136	0.541958	0.725	0.722222	0.691799	0.697574	0.630316	0.604545	0.508521	0.650476	0.669808	0.594872	0.538602	0.645636	0.52331	0.636672	0.54672	0.632543	0.710787	0.590574
0.65625	0.741667	0.765625	0.62381	0.618738	0.589869	0.651657	0.539566	0.536251	0.616522	0.80303	0.754529	0.749046	0.655357	0.712349	0.606576	0.567073	0.646953	0.645833	0.598181	0.593939
0.474286	0.616667	0.474026	0.473785	0.48233	0.633913	0.609784	0.731935	0.556066	0.636216	0.609041	0.70406	0.560087	0.740451	0.727778	0.612254	0.725188	0.62453	0.633599	0.571832	0.690295
0.679766	0.62087	0.560714	0.503367	0.505266	0.793805	0.840709	0.555353	0.571429	0.705635	0.792131	0.666732	0.69711	0.75513	0.585568	0.644951	0.640175	0.691824	0.567927	0.641236	0.725085
0.574138	0.480861	0.6	0.513378	0.569697	0.627273	0.740909	0.694444	0.655687	0.601601	0.669872	0.723077	0.814751	0.733745	0.65723	0.689549	0.706439	0.651535	0.583987	0.591822	0.608054
0.502381	0.652778	0.455453	0.592857	0.448319	0.583333	0.70542	0.708757	0.631944	0.542279	0.66056	0.678571	0.591667	0.583907	0.693344	0.723485	0.67928	0.618919	0.651293	0.716403	0.535895
0.544444	0.595238	0.479167	0.625556	0.692308	0.548684	0.677358	0.709114	0.673127	0.680287	0.618421	0.72973	0.727451	0.664066	0.667701	0.527394	0.609217	0.575846	0.555263	0.639855	0.752455
0.670635	0.516484	0.516667	0.556677	0.505449	0.587265	0.638028	0.558638	0.518367	0.615743	0.662368	0.662194	0.706751	0.61415	0.641238	0.688853	0.680702	0.703089	0.691431	0.628627	0.513146
1	0.433333	0.619048	0.821429	0.722222	0.583333	0.789116	0.553281	0.479412	0.518338	0.614448	0.65017	0.620714	0.540952	0.572748	0.627753	0.739574	0.677972	0.658493	0.637821	0.724074
0.731481	0.614907	0.815789	0.642857	0.761905	0.599734	0.597634	0.581585	0.457408	0.671234	0.714191	0.638937	0.701613	0.672497	0.582384	0.644518	0.623269	0.653567	0.731061	0.725648	0.776863
0.42069	0.565657	0.343333	0.589286	0.666476	0.617949	0.65038	0.562702	0.609398	0.610825	0.71164	0.66087	0.651232	0.61443	0.688893	0.741511	0.67161	0.753252	0.594275	0.601562	0.595238
0.607639	0.590476	0.683333	0.931034	0.790196	0.617837	0.73069	0.836161	0.5	0.585071	0.652271	0.752451	0.791176	0.728161	0.742015	0.633559	0.672826	0.784981	0.70915	0.694583	0.712366
0.709524	0.75	0.651961	0.801087	0.68625	0.714744	0.691159	0.679824	0.576345	0.654296	0.688211	0.776364	0.7562	0.714286	0.722947	0.641403	0.611408	0.573564	0.707071	0.671429	0.717316
0.502392	0.676471	0.662239	0.686275	0.635142	0.660875	0.705952	0.744467	0.617104	0.56062	0.757858	0.714127	0.79798	0.671596	0.695261	0.787856	0.677024	0.639578	0.735963	0.751488	0.765898
0.719029	0.758929	0.545833	0.74359	0.72782	0.825855	0.788105	0.572797	0.546154	0.629268	0.784611	0.750204	0.798195	0.810516	0.792221	0.766667	0.720896	0.861284	0.807143	0.751962	0.638084
0.623188	0.590909	0.541114	0.809091	0.669444	0.667249	0.690522	0.815299	0.574004	0.631944	0.725745	0.61996	0.763889	0.743241	0.740243	0.690183	0.731875	0.751852	0.811304	0.68323	0.734848
0.818182	0.875	0.775	0.4	0.25	0.533333	0.491453	0.572464	0.432015	0.429398	0.594943	0.656287	0.616728	0.566319	0.55946	0.549351	0.463158	0.605512	0.576984	0.471678	0.547078
0.633333	0.756494	0.619231	0.696488	0.60119	0.613095	0.641228	0.664583	0.563798	0.449808	0.560525	0.605147	0.656627	0.596856	0.687936	0.759793	0.493421	0.530556	0.505556	0.660256	0.52381
0.657088	0.633971	0.676441	0.710906	0.595935	0.496436	0.571204	0.626887	0.518954	0.662406	0.676686	0.635902	0.5625	0.571429	0.681373	0.721489	0.602509	0.651099	0.604476	0.552426	0.804813
0.572727	0.54102	0.619118	0.517045	0.607993	0.575758	0.659238	0.584742	0.516522	0.555556	0.597209	0.632353	0.61569	0.662893	0.67022	0.529367	0.542397	0.648325	0.617347	0.629789	0.560965
0.681992	0.691429	0.601443	0.578305	0.581197	0.505229	0.620502	0.581563	0.478326	0.520299	0.698208	0.562297	0.71457	0.586607	0.649374	0.626255	0.630997	0.591111	0.695249	0.678846	0.598309
0.651843	0.574072	0.57181	0.592441	0.574248	0.537394	0.613427	0.562446	0.602154	0.612718	0.693872	0.676732	0.686825	0.631781	0.676048	0.647086	0.650524	0.732407	0.64393	0.540982	0.595014
0.594444	0.574713	0.696581	0.717172	0.605769	0.527418	0.649111	0.578217	0.658974	0.512035	0.59226	0.701249	0.709956	0.6341	0.670082	0.699346	0.72689	0.61016	0.656061	0.508654	0.592227
0.625	0.671429	0.466897	0.632919	0.632609	0.634461	0.597529	0.571883	0.477526	0.573333	0.510636	0.624653	0.583981	0.645714	0.690199	0.708927	0.631435	0.628356	0.59	0.59809	0.733333
0.57619	0.387097	0.508562	0.328125	0.569805	0.805425	0.494544	0.575	0.751541	0.673669	0.855061	0.767119	0.723134	0.690331	0.788974	0.68122	0.77614	0.760155	0.716176	0.769115	0.519568
0.924528	0.830769	0.85619	0.833333	0.834192	0.841518	0.85846	0.935484	0.784755	0.665344	0.871184	0.916811	0.928889	0.867424	0.904211	0.962963	0.866667	0.911111	0.848309	0.903268	0.775531
0.819853	0.826326	0.796851	0.802083	0.924242	0.934036	0.876533	0.927273	0.81821	0.731939	0.799425	0.875	0.98	0.831418	0.95	0.877663	0.94703	0.873453	0.947944	0.81878	0.728846
0.673759	0.731818	0.812354	0.709399	0.893415	0.9759	0.93129	0.5	0.777159	0.74795	0.895166	0.979992	0.869565	0.940429	0.934486	0.976923	0.983871	0.874728	0.907243	0.798158	0.703625
0.677383	0.708647	0.736742	0.863095	0.777473	0.834921	0.839086	0.925	0.763981	0.669987	0.804563	0.978884	0.9	0.746542	0.955732	0.988372	0.915094	0.814536	0.779018	0.763355	0.827277
0.853509	0.700181	0.790625	0.715812	0.730392	0.829649	0.9125	0.923549	0.715813	0.874457	0.891304	0.954453	0.586616	0.958333	0.87037	0.847739	0.900463	0.767241	0.809869	0.852843	0.818182
0.619048	0.752973	0.834821	0.755357	0.805556	0.809397	0.81359	0.723652	0.701258	0.704417	0.935848	0.908451	0.816825	0.938776	0.904412	0.864035	0.848701	0.861528	0.898997	0.868295	0.892973
0.9	0.864286	0.885417	0.755914	0.819398	0.860532	0.903846	0.834021	0.655874	0.881162	0.735425	0.887534	0.753517	0.864803	0.728671	0.820476	0.864615	0.869876	0.688556	0.84749	0.875
0.558333	0.371429	0.62963	0.763889	0.784091	0.45027	0.594262	0.602367	0.59304	0.558511	0.543728	0.601455	0.549889	0.553214	0.530716	0.48445	0.49096	0.497845	0.501954	0.52294	0.499589
0.565476	0.533333	0.473077	0.464286	0.541868	0.485227	0.671988	0.539526	0.602795	0.622549	0.703716	0.572222	0.6	0.55831	0.558621	0.584127	0.537854	0.510632	0.73341	0.605556	0.582895
0.706349	0.775862	0.689441	0.396617	0.614583	0.770833	0.718425	0.370536	0.60493	0.588085	0.572354	0.593538	0.679825	0.5648	0.447846	0.635297	0.619444	0.671986	0.692029	0.608827	0.607864
0.633333	0.602564	0.569378	0.629121	0.804029	0.726103	0.71688	0.721154	0.466667	0.685345	0.677083	0.674279	0.497931	0.393939	0.750952	0.741758	0.666667	0.472149	0.662162	0.627086	0.654545
0.714912	0.716667	0.5	0.704545	0.5271	0.873249	0.812638	1	0.537616	0.601737	0.671221	0.64328	0.530488	0.521133	0.620479	0.607972	0.557214	0.472159	0.527311	0.639151	0.815972
0.836898	0.681818	0.505051	0.283333	0.375	0.75	0.40625	0.475789	0.398148	0.527778	0.752392	0.636035	0.637708	0.516144	0.625	0.730263	0.661465	0.571475	0.42551	0.494831	0.610653
0.383681	0.673077	0.583333	0.528533	0.527778	0.469203	0.505263	0.613636	0.556435	0.638636	0.690426	0.582844	0.686027	0.627807	0.765497	0.769863	0.814103	0.643636	0.725926	0.620098	0.743452
0.614286	0.520833	0.430481	0.471429	0.5	0.619565	0.732143	0.506944	0.408232	0.534014	0.557516	0.533248	0.6	0.529331	0.625974	0.56203	0.651648	0.632045	0.606265	0.553651	0.532766
0.761905	0.6	0.916667	0.666667	0.6875	0.759259	0.787375	0.9375	0.755277	0.732143	0.861244	0.742401	0.78637	0.600631	0.792548	0.723611	0.82186	0.832111	0.708333	0.703008	0.521998
0.454545	0.409091	0.5625	0.136364	0.43007	0.491176	0.5625	0.642857	0.775641	0.867262	0.951203	0.806818	0.911658	0.821202	0.856642	0.962963	0.927742	0.861111	0.892702	0.894737	0.830556
0.469512	0.679167	0.823077	0.792941	0.86918	0.869048	0.928409	0.832733	0.934266	1	0.961538	0.923913	0.956522	0.909903	0.962025	0.916667	0.915196	0.897917	0.910384	0.89436	0.86211
0.670238	0.848531	0.871118	0.911765	0.92381	0.964286	0.937057	0.921053	0.795827	0.912768	0.953704	0.896429	0.858045	0.730433	0.987179	0.98	0.96	0.925274	0.808988	0.86887	0.85063
0.858631	0.833732	0.944444	0.936538	0.971429	0.974359	0.954791	0.768486	0.873049	0.873718	0.972201	0.979167	0.861413	0.94697	0.970565	0.876488	0.904279	0.829688	0.780932	0.698769	0.714408
0.694444	0.583333	0.668831	0.788889	0.786932	0.78	0.851293	0.675212	0.753431	0.852273	0.796903	0.803896	0.508006	0.788959	0.909341	0.9	0.925	0.925532	0.855	0.788749	0.849351
0.875	0.541667	0.75	0.9	0.755848	0.85103	0.8625	1	0.705128	0.656538	0.913896	0.710025	0.712963	0.80464	0.96875	0.946779	0.864764	0.892793	0.960594	0.876244	0.881181
0.857143	0.625	0.525974	0.566667	0.802083	0.85	0.933794	1	0.75675	0.792045	0.846032	0.872071	0.851852	0.732699	0.931287	0.951075	0.960784	0.884091	0.914634	0.839355	0.879804
*Each row represents a session from one animal; n/a: insufficient spike counts and occupancy

## Sheet: DecodingAccuracy_CA1(OUT)
Location bin (cm)
19	27	35	43	51	59	67	75	83	91	99	107	115	123	131	139	147	155	163	171	179
0.9	0.625	0.75	0.666667	0.375	0.59375	0.808929	0.627817	0.622492	0.765131	0.86391	0.808271	0.777608	0.781055	0.805975	0.81109	0.753588	0.921691	0.860532	0.804813	0.75
0.660948	0.794928	0.654481	0.717258	0.758937	0.794355	0.693596	0.675294	0.551673	0.757343	0.80617	0.838399	0.8	0.817436	0.848094	0.977273	0.990566	0.955882	0.957759	0.957447	0.986111
0.703557	0.687052	0.635417	0.544138	0.584049	0.685268	0.605662	0.589295	0.769396	0.842627	0.915033	0.9	0.927083	0.964286	0.925901	0.947259	0.984848	0.968085	0.9875	0.952991	0.972222
0.651714	0.630253	0.604676	0.649123	0.673674	0.646603	0.668336	0.767464	0.749483	0.828145	0.976757	0.934817	0.9375	0.854545	0.945207	0.906993	0.967742	0.980392	1	1	1
0.646104	0.570652	0.582455	0.633399	0.698322	0.760684	0.797274	0.714347	0.75881	0.884255	0.876623	0.930746	0.94186	0.821691	0.92619	0.896761	0.947958	1	1	1	0.985714
0.593189	0.615055	0.614116	0.650521	0.686184	0.723086	0.84801	0.761658	0.862139	0.88093	0.886777	0.961928	0.921301	0.81497	0.875751	0.959857	0.971503	0.968023	0.987832	1	0.985861
0.718709	0.739643	0.760941	0.657407	0.744048	0.826143	0.836207	0.82191	0.900148	0.899855	0.921059	0.982456	0.967105	0.91743	0.869565	0.954333	0.96875	1	1	1	1
0.693785	0.761111	0.698718	0.678842	0.691392	0.6975	0.778227	0.672526	0.851487	0.895309	0.932222	0.863415	0.762866	0.816533	0.721997	0.914894	0.877901	0.856548	0.895349	0.949359	1
0.59375	0.729839	0.337535	0.527778	0.361111	0.267857	0.646396	0.481138	0.552615	0.770685	0.790877	0.81044	0.900123	0.867857	0.829278	0.913386	0.897585	0.876643	0.9125	0.9	0.813636
0.695789	0.63206	0.452614	0.411765	0.4	0.414634	0.736111	0.589191	0.66074	0.705215	0.864382	0.758929	0.809476	0.748611	0.667433	0.741956	0.82672	0.804477	0.788889	0.786932	0.840426
0.564286	0.673364	0.678947	0.798077	0.702059	0.666481	0.702575	0.571825	0.813459	0.79219	0.853697	0.809619	0.796086	0.785054	0.911095	0.968468	0.846154	0.711538	0.958333	0.833333	1
0.655397	0.606227	0.715789	0.634615	0.742647	0.59018	0.586013	0.609288	0.601794	0.78395	0.863346	0.886458	0.895299	0.75641	0.935993	0.923817	0.993506	0.952381	0.890873	0.977273	0.9
0.559391	0.531653	0.663723	0.811012	0.888031	0.671429	0.648052	0.551921	0.628496	0.869658	0.903711	0.988372	0.85625	0.888889	0.883327	0.912489	0.944032	0.971371	0.96	0.934783	0.934783
0.676471	0.676592	0.647362	0.75	0.703571	0.819444	0.678015	0.782738	0.644798	0.792223	0.905081	0.884868	0.862727	0.965517	0.827294	0.829545	0.973214	0.96875	0.895946	0.924444	0.952381
0.638889	0.705128	0.551245	0.666667	0.772069	0.750255	0.712683	0.643182	0.892491	0.907046	0.880525	0.824393	0.876142	0.737008	0.881447	0.842096	0.935827	0.965116	0.973684	0.861111	0.92
0.657005	0.477124	0.636766	0.646703	0.605911	0.681818	0.720238	0.734103	0.637579	0.861455	0.78899	0.875166	0.860938	0.954545	0.94164	0.84726	0.919355	0.895833	0.844013	0.859848	0.920259
0.553571	0.558182	0.764957	0.838235	0.717122	0.636702	0.629167	0.589491	0.76846	0.632298	0.719916	0.814093	0.917367	0.850068	0.886015	0.696415	0.716682	0.792424	0.737267	0.849327	0.816176
0.61622	0.598214	0.677489	0.685688	0.649979	0.620677	0.785714	0.640673	0.770513	0.886433	0.817323	0.914474	0.901579	0.916891	0.822074	0.779915	0.907018	0.920569	0.944444	0.866667	0.927381
0.537587	0.577851	0.648438	0.628524	0.547222	0.701122	0.59965	0.751491	0.834219	0.950163	0.905172	0.770232	0.803263	0.90411	0.729167	0.866881	0.916071	0.945588	0.870629	0.903846	0.887097
0.598935	0.559751	0.603259	0.535849	0.591379	0.739662	0.67467	0.663842	0.792265	0.811201	0.82682	0.790066	0.785256	0.805464	0.796296	0.914381	0.961873	0.974684	0.968085	0.942857	0.882353
0.546992	0.540865	0.558631	0.592334	0.70148	0.556723	0.791667	0.799003	0.755682	0.815941	0.773858	0.752837	0.93665	0.946657	0.927469	0.941472	0.955609	0.956522	0.950588	0.969697	0.941176
0.549128	0.645511	0.60625	0.640224	0.615741	0.632827	0.579122	0.681164	0.74484	0.828053	0.688961	0.864286	0.90417	0.784167	0.895147	0.943182	0.960065	0.992754	0.987805	0.961538	0.96
0.710578	0.63862	0.692278	0.679331	0.646991	0.688521	0.796875	0.759402	0.886719	0.855956	0.800085	0.884792	0.894953	0.854827	0.868939	0.92	0.929167	0.991379	0.892199	0.922222	0.919444
0.59359	0.523148	0.609195	0.647436	0.701305	0.635875	0.71503	0.777821	0.806586	0.847243	0.82598	0.825427	0.865909	0.787662	0.928683	0.957447	0.912243	0.942456	0.95	0.96131	0.960031
1	1	1	1	1	1	0.854839	0.671062	0.465278	0.494074	0.662886	0.717407	0.642389	0.639282	0.673713	0.757922	0.711439	0.816527	0.694444	0.650155	0.647147
0.61086	0.702236	0.638889	0.538655	0.642755	0.693333	0.71371	0.601758	0.626594	0.688661	0.75	0.885771	0.833411	0.809249	0.954545	0.939759	0.918956	0.982759	0.931818	0.90625	0.825792
0.508333	0.485294	0.574459	0.533621	0.663474	0.691667	0.6625	0.724702	0.602632	0.823053	0.805986	0.938715	0.957692	0.923077	1	0.934375	0.939024	1	0.952273	0.973684	0.9375
0.673793	0.70453	0.683761	0.390476	0.558333	0.521222	0.642857	0.638095	0.64026	0.77883	0.886977	0.986842	0.988889	0.872093	0.931818	0.953379	0.985714	0.931386	0.964286	0.952381	0.85
0.723776	0.587179	0.694932	0.513926	0.643678	0.504348	0.692529	0.711967	0.743881	0.844433	0.947088	0.988636	0.945542	0.949405	1	0.983333	1	0.981481	1	1	1
0.715278	0.65625	0.644737	0.65625	0.583333	0.684211	0.763077	0.758065	0.636408	0.967201	0.944034	0.983333	0.99	0.985294	0.985294	1	1	0.930556	0.92	0.921875	0.921875
0.751374	0.825	0.664865	0.456446	0.644444	0.673077	0.677778	0.621622	0.787745	0.869012	0.901961	0.921212	0.894297	0.944444	1	1	1	0.966667	0.955882	0.978723	0.943396
0.608734	0.576042	0.579966	0.558333	0.404762	0.501984	0.543103	0.65109	0.726166	0.820296	0.8784	0.94	0.925354	0.92412	0.970588	0.936934	0.946809	0.979167	0.961538	0.958333	0.90625
0.541667	0.654762	0.634921	0.660714	0.6875	0.904762	0.722222	0.682353	0.581288	0.743049	0.767756	0.88832	0.834764	0.82729	0.725833	0.920524	0.840584	0.908333	0.716749	0.84375	0.793417
0.818182	0.569444	0.696911	0.531359	0.644643	0.5	0.580357	0.685897	0.632353	0.794027	0.841964	0.943834	0.936364	0.840154	0.888333	0.935613	0.992754	0.986486	0.881481	0.777778	1
0.541667	0.548491	0.502635	0.594017	0.663399	0.626566	0.739339	0.632937	0.581101	0.897166	0.895522	0.940367	0.962486	0.860225	0.960317	0.834851	0.923611	0.820513	0.861111	0.930556	0.972222
0.622332	0.602778	0.593414	0.65	0.55473	0.685	0.636961	0.663008	0.970588	0.877921	0.944444	0.983333	0.921292	0.96875	0.981481	0.983333	0.902778	0.928571	1	1	1
0.692424	0.676154	0.64482	0.650238	0.594877	0.611562	0.767677	0.891604	0.75	0.869007	0.868075	0.976374	0.991803	1	1	0.973684	0.941558	0.758413	0.854167	0.975	1
0.762363	0.725524	0.653409	0.708333	0.718519	0.53125	0.672932	0.665816	0.903226	0.876253	0.921875	0.966667	0.976744	1	0.964286	0.934444	0.787841	0.931034	0.97619	0.9375	0.875
0.561404	0.638889	0.72807	0.712121	0.688172	0.667067	0.770979	0.746703	0.834559	0.908333	0.99	0.92	0.879167	0.826087	0.916667	0.892361	0.804924	0.894928	0.777778	0.9375	0.857143
0.642647	0.574248	0.651584	0.750321	0.807843	0.73399	0.691667	0.646479	0.574405	0.785906	0.908046	0.831081	0.822917	0.815789	0.784921	0.84991	0.79	0.747222	0.958333	1	1
0.526901	0.595238	0.778846	0.671875	0.633333	0.633333	0.729885	0.555556	0.675	0.799004	0.887755	0.862839	0.828724	0.798128	0.862601	0.881283	0.913671	0.925	0.928209	0.71836	0.857143
0.561129	0.549799	0.711364	0.651072	0.626359	0.706818	0.669355	0.599025	0.672826	0.810229	0.928261	0.907163	0.891089	0.797748	0.906638	0.9875	0.917092	0.981481	0.958333	0.90625	0.88
0.528892	0.597692	0.616906	0.661367	0.509868	0.595455	0.67803	0.740741	0.759004	0.792208	0.948519	0.972222	0.928994	n/a	0.994118	0.991228	0.927083	0.962963	0.916667	0.892857	0.686508
0.557152	0.681548	0.673684	0.635057	0.536364	0.586339	0.606943	0.553911	0.777778	0.780733	0.969136	0.975668	0.802561	0.752809	0.888889	0.984615	0.975	0.93964	1	0.924242	0.896552
0.613376	0.568545	0.686782	0.67991	0.736364	0.751736	0.69868	0.527778	0.811497	0.748585	0.908972	0.95122	0.944444	0.960784	1	0.840476	0.907843	0.982143	1	1	0.925
0.63474	0.686992	0.604762	0.588889	0.611779	0.720513	0.703784	0.638889	0.61037	0.966484	0.975641	0.953488	0.968661	1	0.988095	0.953853	0.962963	1	0.939167	0.977273	1
0.72496	0.786957	0.833333	0.744048	0.649055	0.73871	0.687903	0.717535	0.709957	0.861364	0.967742	0.95	0.904924	1	0.966667	0.882143	0.926683	0.964286	0.973684	0.96875	1
0.548872	0.66092	0.597522	0.667857	0.772727	0.784722	0.685484	0.793767	0.786494	0.780012	0.885271	0.880806	0.875	0.8125	0.9275	0.919355	1	0.970588	1	1	n/a
0.604167	0.326923	0.565657	0.632184	0.488636	0.789216	0.711111	0.620833	0.618304	0.753005	0.736948	0.827839	0.813341	0.79214	0.891456	0.91859	0.9125	0.91178	0.84979	0.88767	0.840395
0.691288	0.560873	0.653595	0.665039	0.587668	0.561303	0.582492	0.62256	0.653646	0.850735	0.842842	0.910714	0.975123	0.946639	0.829433	0.907748	0.960789	0.974576	0.968528	0.988372	0.95671
0.535714	0.555013	0.593766	0.556049	0.574459	0.63848	0.554045	0.535618	0.66503	0.907076	0.989583	0.966989	0.981692	1	1	1	1	1	1	1	1
0.598516	0.672276	0.641285	0.649935	0.639774	0.610021	0.672319	0.649495	0.812937	0.87563	0.938034	0.89698	0.946103	0.920455	1	1	0.984375	1	1	0.980769	0.99
0.747984	0.60559	0.647054	0.716591	0.639316	0.654514	0.703284	0.749354	0.764286	0.943662	0.976852	0.927587	0.956823	0.85658	0.963235	0.962443	0.940581	0.969697	1	1	1
0.691667	0.632114	0.602975	0.52451	0.652014	0.7	0.661905	0.737839	0.878064	0.853125	0.952396	0.930794	0.884921	1	0.981132	0.9875	0.927443	0.950538	1	0.971405	0.952381
0.57594	0.588211	0.628587	0.524582	0.530369	0.567502	0.605574	0.585293	0.742656	0.860825	0.91821	0.940833	0.805669	0.9	0.991379	0.989362	0.952381	0.961538	0.916667	0.932432	0.944444
0.545977	0.615809	0.652836	0.703131	0.780526	0.610565	0.669828	0.600794	0.827744	0.892308	0.814397	0.864137	0.787432	0.884286	0.96654	1	0.808497	0.917742	0.982143	0.982759	1
0.734188	0.64359	0.716327	0.862069	0.654917	0.680791	0.708067	0.720833	0.596505	0.637143	0.798563	0.848485	0.898529	0.845965	0.856658	0.804947	0.859736	0.91198	0.948261	0.914988	0.95164
0.736257	0.726608	0.654271	0.600427	0.577667	0.603108	0.64742	0.601816	0.673065	0.857501	0.817782	0.933152	0.957386	0.809154	0.96	0.950976	0.954545	0.953846	0.921875	0.925	0.918367
0.613636	0.656126	0.657895	0.717866	0.497692	0.659649	0.662021	0.657515	0.77184	0.812011	0.915266	0.851272	0.884752	0.82269	0.956944	0.845571	0.94791	0.933333	0.859183	0.901363	0.966667
0.547619	0.58817	0.748421	0.703019	0.808421	0.76461	0.831532	0.712644	0.650293	0.9315	0.891253	0.948986	0.911458	0.899713	0.924242	0.98913	0.90801	0.964286	0.893939	0.92619	1
0.728328	0.716912	0.757143	0.718227	0.75	0.61175	0.657088	0.786232	0.670478	0.807304	0.919872	0.862554	0.889368	0.752777	0.828365	0.828248	0.910973	0.943452	0.901538	1	0.842857
0.468487	0.763636	0.611111	0.791925	0.834615	0.643319	0.91875	0.636124	0.825	0.752338	0.886364	0.931818	0.790283	0.796891	0.945358	0.889286	0.945513	0.874224	0.89883	1	0.958333
0.68318	0.694792	0.670019	0.628759	0.605263	0.770433	0.54359	0.774167	0.687981	0.857143	0.975	0.9875	0.902273	0.904181	0.928571	1	0.935637	0.846154	0.907407	0.924444	0.9
0.722093	0.711051	0.756188	0.636335	0.702862	0.780303	0.774784	0.70569	0.72381	0.904935	0.938164	0.9375	0.833987	0.740833	0.875	0.90618	0.927419	0.930702	0.948276	0.92013	0.973684
0.781513	0.815244	0.877757	0.884615	0.808333	0.96875	0.916667	0.859394	0.739963	0.799863	0.87026	0.915278	0.969948	0.914505	0.935714	0.949438	0.969123	0.967539	0.981481	0.984375	0.984375
0.837691	0.824444	0.760163	0.813656	0.784188	0.72619	0.612069	0.702899	0.687944	0.821753	0.929041	0.956539	0.942623	0.965863	1	0.947643	0.978723	0.984848	1	0.980769	1
0.772416	0.759832	0.563312	0.643849	0.704823	0.641862	0.776353	0.660703	0.814103	0.947619	0.943994	0.960553	0.91951	0.936607	0.993827	0.977408	0.953488	1	1	1	0.988636
0.687493	0.735037	0.772222	0.581967	0.67381	0.656184	0.778409	0.729255	0.698155	0.953704	0.94898	0.984848	0.965088	0.87728	0.94494	0.990385	1	1	1	1	1
0.84965	0.811654	0.7875	0.695141	0.798696	0.731349	0.737097	0.793045	0.694853	0.894607	0.956093	0.990909	0.937843	1	1	1	0.947861	1	1	0.98	0.928571
0.656364	0.596501	0.588525	0.68863	0.709677	0.737165	0.676236	0.569854	0.74754	0.858333	0.944211	0.900072	0.864983	0.869505	0.924156	1	0.96875	1	1	1	1
0.758333	0.667763	0.742563	0.731481	0.862745	0.737179	0.788102	0.751852	0.687634	0.834288	0.984375	0.98	0.934783	0.882638	0.940476	1	1	0.964286	1	1	1
0.578063	0.728172	0.81485	0.773994	0.731618	0.657792	0.809568	0.810811	0.70293	0.786765	0.931818	0.944444	1	0.894256	0.934783	1	1	1	0.958333	0.875	1
*Each row represents a session from one animal; n/a: insufficient spike counts and occupancy

## Sheet: DecodingAccuracy_CA1(IN)
Location bin (cm)
19	27	35	43	51	59	67	75	83	91	99	107	115	123	131	139	147	155	163	171	179
0.636364	0.875	0.675	0.2	0.5	0.7	0.82906	0.534058	0.556654	0.716923	0.769549	0.79798	0.770527	0.714232	0.690662	0.801299	0.790741	0.881568	0.826984	0.913832	0.74513
0.9	0.892857	0.713462	0.846154	0.779762	0.735772	0.750292	0.547917	0.516317	0.65849	0.798351	0.822858	0.808079	0.776172	0.831643	0.949134	0.921053	0.912618	0.894444	0.905288	0.924621
0.945722	0.950957	0.844793	0.896151	0.722935	0.77122	0.792978	0.863095	0.775399	0.935616	0.939426	0.887271	0.833333	0.928571	0.930556	0.97509	0.977273	0.990385	0.983051	0.96635	0.93984
0.954545	0.931818	0.875	0.86553	0.835034	0.769231	0.798077	0.954448	0.670503	0.786325	0.988372	0.970779	0.891118	0.947799	0.988372	0.987952	0.974694	0.981481	0.98222	1	0.973958
1	0.9	0.8332	0.928571	0.800654	0.776644	0.86453	0.82834	0.850564	0.99537	0.989362	0.893509	0.825826	0.938447	0.930224	0.972348	0.881752	0.972603	0.972041	0.969697	0.973214
0.956671	0.93525	0.927617	0.941665	0.957406	0.837332	0.913397	0.731183	0.804696	0.960309	0.980374	0.930545	0.935132	0.846099	0.935945	0.927546	0.966539	0.961152	1	0.997127	0.956894
0.969444	0.953612	0.903846	0.864899	0.910256	0.894317	0.885854	0.760604	0.960256	0.938356	0.962774	0.901035	0.854911	0.954023	0.873437	0.955556	0.967742	0.977941	0.982845	0.979924	0.931235
0.979167	0.93348	0.88	0.798627	0.975	1	0.897131	0.773794	0.775791	0.934684	0.912281	0.847623	0.680638	0.734086	0.815294	0.87091	0.926282	0.965008	0.910769	0.835938	0.933333
0.5	0.75	0.7	0.653846	0.596154	0.6	0.714789	0.667408	0.591775	0.65426	0.770186	0.85453	0.81248	0.635576	0.837019	0.811702	0.8125	0.782591	0.811678	0.916667	0.791344
0.699352	0.6	0.504386	0.77381	0.597619	0.640957	0.589351	0.584719	0.665356	0.554422	0.731238	0.717102	0.790447	0.683252	0.6803	0.650658	0.812698	0.804348	0.819264	0.809295	0.809565
0.608621	0.759857	0.813333	0.702381	0.759725	0.7	0.764095	0.546079	0.632919	0.832642	0.925044	0.826173	0.911194	0.913833	0.937954	0.939304	0.982759	0.987805	0.969072	0.879032	0.906966
0.71147	0.867647	0.9	0.858238	0.780392	0.794592	0.765172	0.935417	0.664857	0.661921	0.797529	0.825745	0.93261	0.894704	0.882143	0.963051	0.97663	0.925	0.97	0.935714	0.952381
0.85	0.925	0.885621	0.841304	0.7975	0.801282	0.841487	0.772831	0.540568	0.716246	1	0.896807	0.866803	0.961538	0.991525	0.970965	0.983333	0.964286	0.969697	1	0.98913
0.856459	0.941176	0.841176	0.845938	0.908527	0.803089	0.914286	0.925136	0.438155	0.635504	0.894171	0.940957	0.923632	0.840524	0.96	0.9625	0.927879	0.89	0.93984	0.97247	0.961895
0.876756	0.904762	0.908333	0.714238	0.735985	0.701374	0.794516	0.701788	0.643799	0.807165	0.897927	0.885943	0.854764	0.905014	0.968057	0.904762	0.985075	0.978261	0.985294	0.918367	0.94636
0.766304	0.909091	0.781167	0.8875	0.853997	0.706876	0.740122	0.833544	0.583017	0.748654	0.900071	0.849158	0.892523	0.829332	0.888851	0.9533	0.929677	0.91859	0.916522	0.9625	0.983333
0.744582	0.775568	0.870629	0.7625	0.826389	0.675926	0.797447	0.676289	0.755914	0.709373	0.694521	0.751547	0.860256	0.711204	0.864546	0.898122	0.832742	0.847653	0.737069	0.814821	0.737125
0.75	0.825	0.859375	0.882353	0.84462	0.830065	0.772983	0.711864	0.683333	0.801715	0.80303	0.850276	0.85	0.940152	0.87892	0.94494	1	0.944444	0.916667	0.886979	0.857143
0.812857	0.883333	0.918831	0.955882	0.936784	0.944742	0.873421	0.854968	0.842538	0.756874	0.806911	0.758036	0.773013	0.840278	0.958333	0.96365	0.978261	0.933962	0.837977	0.718904	0.766422
0.879599	0.914783	1	1	1	0.938673	0.902736	0.815397	0.819369	0.917423	0.877	0.912076	0.796923	0.880845	0.921775	0.991525	0.922153	0.925214	0.964286	0.846784	0.831818
0.810484	0.925974	1	0.978261	1	0.944545	0.864059	0.865854	0.690878	0.792092	0.830087	0.908296	0.958405	0.975532	0.9375	0.832406	0.926136	0.91624	0.827001	0.796053	0.728571
0.818555	0.928571	0.935484	0.95	0.971429	0.97561	0.931989	0.876744	0.819483	0.795892	0.884851	0.900603	0.922727	0.781117	0.981818	0.924242	0.95098	0.9875	0.970259	0.834409	0.784676
0.726852	0.90522	0.944444	1	0.963275	0.831624	0.859729	0.848708	0.699653	0.862961	0.839762	0.934762	0.89902	0.911772	0.955507	0.92701	0.88447	0.895349	0.857895	0.793121	0.771237
0.94	0.97619	1	0.978261	0.973684	0.831921	0.814153	0.882093	0.795726	0.776897	0.770035	0.842948	0.90657	0.811413	0.886615	0.939024	0.986486	0.930159	0.819379	0.784062	0.841687
0.6875	0.741259	0.875	0.801587	0.800926	0.559394	0.398153	0.486765	0.636905	0.730179	0.705455	0.703492	0.801733	0.7792	0.880836	0.891066	0.943933	0.944402	0.918919	0.749261	0.820376
0.690323	0.645714	0.683502	0.724074	0.809117	0.751782	0.810414	0.533333	0.774805	0.75625	0.877044	0.98855	0.84	0.934503	0.960324	0.944697	0.940285	0.933747	0.872203	0.900161	0.766786
0.504118	0.676951	0.744048	0.742733	0.846952	0.84322	0.966292	0.515584	0.772259	0.814272	0.901518	1	0.964286	1	1	0.983333	0.960904	0.825016	0.890909	0.936982	0.724405
0.773826	0.795396	0.734615	0.69186	0.690909	0.839732	0.868207	n/a	0.813067	0.811335	0.96913	0.993151	0.875	0.929928	0.987179	1	0.939964	0.908964	0.931061	0.936975	0.684191
0.669468	0.809524	0.888258	0.942308	0.867236	0.837957	0.993333	1	0.776039	0.92237	0.984848	0.986607	1	0.959338	0.972598	0.957143	0.880184	0.939796	0.963415	0.835833	0.764062
0.731304	0.681818	0.907407	0.889328	0.921176	0.782456	0.9375	0.775	0.855402	0.954545	0.955128	1	0.906926	0.986486	0.95	0.953125	0.981481	0.920635	0.936364	0.872338	0.947368
0.883023	0.937963	0.925629	0.97619	0.918654	0.880952	0.863636	0.675	0.711996	0.833107	0.970588	0.984043	0.95	0.946809	0.982143	0.945913	0.923677	0.937706	0.9	0.895691	0.944444
0.972222	0.964286	1	0.9	0.818182	0.723684	1	0.630769	0.685185	0.84985	0.931917	0.894737	0.862355	0.87226	0.946429	0.910053	1	0.965517	0.976744	0.9375	n/a
1	1	0.5	0.75	1	0.597727	0.537815	0.3	0.535794	0.483462	0.491176	0.560472	0.526786	0.567103	0.777124	0.802778	0.811734	0.802597	0.800207	0.660185	0.811492
0.641026	0.626667	0.666667	0.485577	0.5	0.640909	0.555421	0.436842	0.601173	0.691964	0.695853	0.778226	0.890231	0.972222	0.907407	0.917722	0.987179	0.957627	0.848462	0.889985	0.872222
0.685185	0.592857	0.704545	0.644009	0.694958	0.526444	0.636364	0.660256	0.640649	0.649871	0.813269	0.794872	0.662602	0.908225	0.916667	0.967742	0.911034	0.857915	0.902778	0.914113	0.875
0.666667	0.672515	0.63913	0.583333	0.652381	0.659774	0.729167	0.833333	0.656288	0.703598	0.883333	0.789511	0.846154	0.928213	0.938278	0.86	0.909226	0.895579	0.867374	0.880125	0.698052
0.736111	0.584524	0.65	0.709052	0.702978	0.677802	0.818182	0.864253	0.589766	0.592954	0.828571	0.959402	0.894737	0.950704	0.874459	0.94186	0.901786	0.867424	0.905242	0.633333	0.764943
0.654605	0.599638	0.958333	0.744378	0.75	0.843333	0.915873	0.888889	0.714805	0.722284	0.919158	0.830025	0.970588	1	1	1	0.879344	0.699405	0.749425	0.692308	0.792196
0.759197	0.615385	0.789125	0.922969	0.891304	0.774573	0.924848	0.685714	0.598332	0.628472	0.771429	0.904444	0.962963	0.957944	1	1	0.843632	0.792208	0.749051	0.76789	0.541667
0.709091	0.666667	0.551515	0.522059	0.714286	0.742424	0.71118	0.585714	0.548913	0.540509	0.857545	0.953704	0.934426	0.925207	0.954453	0.910714	0.748737	0.760989	0.668233	0.768229	0.651099
0.5	0.535714	0.3875	0.783333	0.894444	0.497642	0.577731	0.578431	0.532861	0.649009	0.739568	0.786967	0.755417	0.762437	0.806623	0.797683	0.97619	0.840144	0.815476	0.774008	0.841201
0.577381	0.721591	0.664336	0.625	0.708333	0.649206	0.547897	0.517857	0.722011	0.756436	0.696964	0.835498	0.895785	0.879064	0.907407	0.945122	0.914474	0.964286	0.944402	0.844318	0.814039
0.628342	0.399573	0.446429	0.586364	0.592105	0.627841	0.699275	0.761111	0.645648	0.781569	0.646877	0.863445	0.763961	0.730014	0.914244	0.942708	0.943687	0.777098	0.892203	0.878947	0.93414
0.676768	0.648026	0.578947	0.66087	0.530361	0.77325	0.676471	0.797197	0.92	0.924319	0.841667	0.97	0.972222	0.858523	0.897837	0.95	0.966667	0.940476	0.945767	1	0.985294
0.663683	0.525575	0.666667	0.774725	0.770903	0.806016	0.891883	0.9375	0.897076	0.855142	0.846939	0.878676	0.944444	0.831301	0.96	0.892774	0.910714	0.912037	0.986111	0.901736	0.926471
0.671827	0.567669	0.575	0.659919	0.617216	0.713218	0.885714	0.893688	0.945833	0.892857	0.883721	0.944444	1	0.827715	0.973684	0.970588	0.893939	0.921946	0.977273	0.979167	0.887879
0.490476	0.71875	0.785714	0.642361	0.708333	0.778125	0.931034	0.863636	0.880585	0.867368	0.853535	0.880985	0.75463	0.770476	0.875	0.967742	0.96	0.9375	0.983333	0.986111	0.766458
0.643103	0.642857	0.667273	0.77662	0.644928	0.863946	0.821146	0.724828	0.894421	0.884615	0.786318	0.884572	0.820513	0.905075	0.934028	0.930206	0.982759	0.983333	0.97619	0.958333	0.835714
0.5	0.451613	0.455882	0.370968	0.845515	0.744565	0.640523	0.7125	0.645654	0.621605	0.722859	0.826502	0.820562	0.750969	0.910764	0.904487	0.871698	0.801418	0.877396	0.836142	0.800151
0.680588	0.827869	0.914286	0.774415	0.665476	0.693466	0.729217	0.763441	0.680973	0.771268	0.703813	0.807062	0.885417	0.914286	0.927941	0.947619	0.974747	0.920272	0.947917	0.894718	0.954879
0.619892	0.682857	0.6	0.827446	0.876833	0.84887	0.775264	0.906818	0.792794	0.796873	0.918535	0.902525	0.704545	0.891304	0.951613	0.925214	0.918155	0.889831	0.901375	0.927273	0.946154
0.635965	0.698413	0.625225	0.669383	0.807692	0.89881	0.87674	0.833333	0.80854	0.860705	0.903784	0.856832	0.913043	0.964337	0.981132	0.96	0.915909	0.972222	0.940825	0.979452	0.984375
0.607922	0.637218	0.695076	0.6775	0.804581	0.811012	0.642857	0.675	0.618653	0.76688	0.776257	0.948718	0.46	0.813435	0.991379	0.965517	0.943396	0.960317	0.97619	0.951691	0.988636
0.631818	0.679348	0.638542	0.717391	0.72803	0.849906	0.853571	0.755607	0.792148	0.779084	0.88437	0.941558	0.753729	0.924242	0.860317	0.930572	0.963131	0.903176	0.96105	1	1
0.77381	0.622995	0.735294	0.689672	0.82105	0.828341	0.810465	0.674342	0.791075	0.783234	0.796015	0.896226	0.958599	0.977273	0.934211	0.934211	0.977273	0.980433	0.970965	0.949242	0.94
1	0.928571	0.833333	0.928571	0.899267	0.877778	0.923077	0.767751	0.686971	0.8375	0.754979	0.843693	0.837189	0.928332	0.943357	0.910476	0.98	0.971264	0.956897	0.955882	1
0.683333	0.895238	0.66453	0.805556	0.882775	0.744324	0.772199	0.707641	0.766198	0.831061	0.798952	0.777511	0.804624	0.799395	0.773628	0.800108	0.902778	0.950564	0.940941	0.931473	0.919348
0.794974	0.958333	0.914103	0.946429	0.981481	0.947348	0.9125	0.954545	0.825796	0.772549	0.781356	0.882522	0.902632	0.904999	0.906764	0.818254	0.915385	0.884615	0.980263	0.955844	0.940789
0.713942	0.744748	0.785714	0.885338	0.85	0.928571	0.833789	0.772321	0.750858	0.780208	0.789286	0.858201	0.871536	0.833387	0.870474	0.93617	0.977778	0.985714	0.963235	0.959325	0.980392
0.922222	0.961538	0.863636	0.961538	1	1	0.990385	1	0.710569	0.847701	0.925725	0.926435	0.959515	0.835052	0.864286	0.980769	0.954545	1	0.944444	1	0.970455
0.640351	0.5	0.444444	0.534091	0.470085	0.82563	0.733981	0.875	0.693269	0.787097	0.775194	0.851183	0.975309	0.848986	0.908568	0.992424	0.992537	0.897159	0.885394	0.990566	1
0.909091	0.59596	0.525253	1	0.833333	0.829545	0.916667	0.684561	0.819444	0.690476	0.778378	0.780632	0.851579	0.82976	0.896802	0.993421	0.992424	0.96	0.989796	0.973684	0.972973
0.897569	1	0.7	0.625	0.583333	0.810606	0.957895	0.909091	0.785106	0.761364	0.932447	0.934783	0.753367	0.83642	0.918478	0.964286	0.974359	0.94	0.922963	0.991667	1
1	0.8125	0.764706	0.964286	0.964286	0.964286	0.97619	0.746528	0.776099	0.795918	0.842301	0.714091	0.8875	0.705091	0.875	0.928571	0.985714	0.907407	0.913316	0.965909	0.922222
0.75	0.572222	0.5	0.483333	0.5625	0.796296	0.82392	0.90625	0.793292	0.825	0.792265	0.926024	0.970418	0.853931	0.952163	0.977778	0.975242	0.961144	0.907407	0.942199	0.958917
0.857143	0.659091	0.590278	0.837662	0.5	0.6	0.625	1	0.824359	0.944048	0.93984	0.936364	0.965088	0.833696	0.947619	0.971154	0.973871	0.986111	1	1	0.983333
0.613567	0.7125	0.580769	0.744706	0.86031	0.910714	0.988636	0.927371	0.937995	1	0.960938	0.98913	1	0.965728	1	0.982143	0.985294	0.984028	0.962121	0.99375	0.960603
0.7	0.824721	0.942547	0.882353	0.985714	1	0.978723	0.973684	0.909123	0.968324	1	0.954365	1	0.901163	1	1	1	0.992647	0.983871	0.991071	0.980263
0.873512	0.924641	0.916667	0.846154	0.971429	0.98	0.918182	0.890342	0.954682	0.844444	1	0.979167	0.983696	0.984848	1	0.988095	1	0.992188	0.958678	0.911717	0.981132
0.666667	0.625	0.730769	0.888889	0.875	0.98	0.927443	0.785975	0.866667	0.897727	0.939435	0.935714	0.743037	0.878931	1	0.971429	1	1	0.98	0.950918	0.925974
0.75	0.805556	0.8	0.859091	0.972222	0.837194	0.896429	1	0.735897	0.777401	0.907692	0.938956	0.831197	0.916056	1	1	1	1	0.916667	0.985075	0.978251
0.785714	0.791667	0.701299	0.488889	0.84375	0.933333	0.955534	1	0.782	0.927273	0.930159	0.910998	0.814815	0.857135	0.880117	0.983333	0.990196	0.9875	0.95122	0.98	0.96
*Each row represents a session from one animal; n/a: insufficient spike counts and occupancy
