# Supplementary material for: Multiple time-scales of decision-making in the hippocampus and prefrontal cortex
Source: eLife. 2021 Mar 8;10:e66227. doi: 10.7554/eLife.66227 (PMC7993991; doi:10.7554/eLife.66227)
Supplement: Figure 2—source data 1. [file elife-66227-fig2-data1.xlsx]

## Sheet: G_SignificantSeq_prc
CA1	Animal/ Session	1	2	3	4	5	6	7	8
	1	0.203463	0.25829	0.243733	0.215739	0.21223	0.180328	0.213961	0.224115
	2	0.291667	0.238095	0.242424	0.19697	0.202454	0.201439	0.202614	0.213198
	3	0.191304	0.20614	0.197044	0.136564	0.181416	0.120482	0.115789	0.192308
	4	0.261364	0.28866	0.152672	0.183784	0.153846	0.180791	0.196721	0.273381
	5	0.461538	0.230769	0.0588235	0.333333	0.125	0	0.173913	0
	6	0.156977	0.230769	0.21519	0.164179	0.295652	0.337662	0.190476	0.15873
	7	0.230994	0.178964	0.20904	0.167476	0.246575	0.199234	0.189333	0.198324
	8	0.114754	0.181818	0.143369	0.0855856	0.171875	0.137615	0.176	0.193277
	9	0.305609	0.304487	0.251366	0.273642	0.246364	0.266019	0.25813	0.288079
PFC	Animal/ Session	1	2	3	4	5	6	7	8
	1	0.261194	0.285714	0.283117	0.232465	0.287411	0.296675	0.236462	0.332258
	2	0.25641	0.202985	0.189084	0.193916	0.188406	0.161905	0.150459	0.150358
	3	0.132296	0.077551	0.111765	0.0881057	0.173267	0.163121	0.0989583	0.183406
	4	0.2125	0.212579	0.23539	0.222222	0.155	0.200692	0.19697	0.244
	5	0.256463	0.21711	0.172278	0.204423	0.183724	0.170279	0.203872	0.207953
	6	0.194198	0.182373	0.176471	0.146358	0.140684	0.172589	0.144397	0.150794
	7	0.164474	0.116301	0.0926407	0.127637	0.131868	0.129032	0.137255	0.129353
	8	0.157369	0.155995	0.119675	0.112036	0.108022	0.11926	0.150131	0.162429
	9	0.282219	0.287671	0.174048	0.176106	0.173397	0.218447	0.229481	0.27027

## Sheet: H_SeqScore
Session No.	PFC		CA1
	Median	SEM	Median	SEM
1	0.1811	0.005672	0.3644	0.01355
2	0.2281	0.005823	0.4175	0.01025
3	0.2596	0.006595	0.462	0.01001
4	0.2916	0.006607	0.475	0.01076
5	0.2802	0.006713	0.4792	0.011
6	0.2549	0.006978	0.4585	0.01378
7	0.2545	0.006894	0.488	0.01299
8	0.2426	0.006738	0.4512	0.0139

## Sheet: I_SeqSlope
Session No.	PFC		CA1
	Median	SEM	Median	SEM
1	1.668	0.1368	1.52	0.1545
2	2.205	0.1708	2.205	0.1186
3	2.42	0.1768	2.205	0.09346
4	2.31	0.2023	2.205	0.1237
5	2.31	0.2258	1.918	0.114
6	2.205	0.2196	2.105	0.1327
7	2.31	0.1577	1.831	0.1285
8	2.105	0.1692	1.748	0.1302

## Sheet: J_ForwardPrc
CA1	Animal/ Session	1	2	3	4	5	6	7	8
	1	0.709677	0.666667	0.732759	0.706422	0.691358	0.643836	0.663265	0.606838
	2	0.791667	0.733333	0.680556	0.691358	0.719298	0.688889	0.62963	0.69697
	3	0.705882	0.909091	0.777778	0.863636	0.833333	0.857143	0.647059	0.833333
	4	0.660714	0.725	0.771429	0.689655	0.703704	0.76	0.78125	0.666667
	5	n/a	n/a	n/a	n/a	n/a	n/a	n/a	n/a
	6	0.809524	0.689655	0.862069	0.764706	0.892857	0.85	0.727273	1
	7	0.804878	0.710843	0.710843	0.758621	0.759259	0.736842	0.722222	0.770833
	8	0.727273	0.72	0.84375	0.615385	0.807692	0.75	0.75	0.785714
	9	0.698113	0.737226	0.813043	0.72549	0.75814	0.759259	0.712766	0.602941
*n/a: Animal 5 (JS17) was excluded due to low number of significant events in CA1
PFC	Animal/ Session	1	2	3	4	5	6	7	8
	1	0.509434	0.575	0.55	0.540541	0.520833	0.5	0.614035	0.520833
	2	0.772727	0.625	0.472727	0.52	0.5	0.444444	0.5	0.617647
	3	0.5	0.5	0.571429	0.8	0.75	0.363636	0.5625	0.611111
	4	0.657895	0.505882	0.521739	0.485714	0.6875	0.363636	0.5	0.411765
	5	0.704142	0.603896	0.656934	0.684211	0.715447	0.675676	0.578313	0.687075
	6	0.628571	0.637681	0.541985	0.64	0.670213	0.714286	0.650794	0.55914
	7	0.626667	0.666667	0.591837	0.563636	0.638889	0.617647	0.421053	0.483871
	8	0.584615	0.52093	0.502793	0.525424	0.546875	0.590476	0.527397	0.625
	9	0.483516	0.636364	0.533333	0.584615	0.513699	0.511628	0.493976	0.691176
