# Supplementary material for: Multiple time-scales of decision-making in the hippocampus and prefrontal cortex
Source: eLife. 2021 Mar 8;10:e66227. doi: 10.7554/eLife.66227 (PMC7993991; doi:10.7554/eLife.66227)
Supplement: Figure 3—source data 1. [file elife-66227-fig3-data1.xlsx]

## Sheet: Thetaseq_Start_End
CA1					PFC
OUT		IN			OUT		IN
start (cm)	end (cm)	start (cm)	end (cm)		start (cm)	end (cm)	start (cm)	end (cm)
119.691	128.944	-46.2902	23.0869		-64.8196	-105.039	-53.8142	65.7005
111.237	100.397	63.2509	79.4218		-76.9153	-126.299	76.5709	86.2651
4.95384	-8.27694	-18.0085	-37.3696		101.26	89.2604	52.6956	40.6506
-9.65385	-19.2899	13.6297	-11.7239		-121.083	-127.105	10.4504	42.5907
55.8239	31.6018	-8.95711	23.0631		64.6878	50.775	-12.236	48.1047
-91.7168	-78.7168	4.18498	-7.17173		105.287	86.4259	96.8334	89.8334
-56.8827	-10.361	19.0775	11.8504		102.635	92.7574	-18.1157	55.5151
-22.1227	20.2061	125.768	136.608		68.6601	81.9406	-81.5234	-58.3101
-55.0113	14.6125	-8.48001	27.6933		12.2811	-2.17298	3.52632	81.1291
13.9518	-1.2473	-9.69924	1.82453		-28.1655	-11.4465	154.206	138.247
-14.3289	5.95399	-33.7671	-19.8866		36.2621	18.0232	-12.0897	-1.94826
-5.33614	16.9558	-12.2201	1.01072		84.0787	39.6715	124.111	114.234
-12.0663	15.7833	17.82	57.6956		-138.757	-131.53	36.089	79.6599
15.5804	1.12639	55.4944	62.3929		-66.9963	-45.0275	118.28	133.513
-1.56568	9.41875	70.2971	59.2971		-177.049	-156.349	11.2637	-7.59707
10.6674	-3.33258	-20.7643	-9.76426		-80.1598	-4.01854	-28.1639	9.19304
-7.88467	1.80953	25.0776	5.06038		-115.807	-99.088	-84.2366	-55.5699
14.1162	4.99672	87.9488	76.9488		-34.975	15.3423	-27.6951	-17.6403
0.187287	25.8176	143.336	150.59		-43.2416	136.031	-9.86913	-4.12035
-11.829	-16.829	20.0095	8.65276		-13.4462	13.2373	-3.28417	-11.6247
0.570008	8.16956	19.0792	-5.94231		-15.3801	5.76614	-12.9545	-47.4836
-27.3905	6.20194	-2.62197	-11.622		-26.4288	19.8135	76.9798	99.2403
4.65118	21.4092	-13.3912	-45.2642		24.2773	-22.8618	133.122	157.379
7.49286	-11.9851	-9.35523	64.6156		61.3473	-39.7519	-27.0235	19.4982
-16.4094	25.3649	48.8119	57.9314		19.4125	9.77651	-74.9118	-62.2824
49.5956	38.5956	23.5024	30.4009		-17.6425	26.6637	80.9791	70.9791
-2.7344	8.29126	-28.9862	13.7074		60.3254	26.8094	69.7454	80.586
-1.28091	32.3898	6.71144	-19.0372		8.57051	-5.34228	75.3714	68.3714
-9.49419	19.6814	-5.55389	1.44611		42.2392	112.523	-45.578	-17.6239
16.1422	3.49486	-9.79165	-1.08668		-39.3619	124.366	98.3756	105.376
-0.882354	16.6736	-27.7338	18.7879		-132.149	-123.149	54.779	72.2941
-1.17501	17.6858	1.58642	6.58642		9.89436	-3.96642	-33.688	-12.311
28.2188	8.99603	4.77301	16.1297		-22.9737	19.3187	43.856	50.856
-9.64111	4.35889	-69.58	7.91301		3.24809	35.3885	-58.7208	-80.4833
-45.96	-10.686	17.4474	26.701		-2.79565	14.6796	-61.9201	19.3779
-5.68508	13.5377	76.4682	48.6186		9.66843	-2.95014	37.1248	19.4588
-14.7498	49.2905	1.77264	21.223		-12.7676	-24.6651	32.4121	44.4121
-4.7242	25.8406	-8.69617	1.789		4.54966	15.6799	45.2704	89.5766
-14.1712	0.370156	-6.63226	49.8062		2.14163	79.6346	43.7714	15.0028
-178.827	-169.629	-6.53573	1.42569		-86.9574	55.1131	18.874	-2.50302
-3.08469	4.14234	-7.07864	-1.32985		-80.3456	22.48	-13.5984	-2.59844
-1.65678	16.0908	-48.2065	5.20644		-65.7962	-77.32	-7.4626	6.1564
3.7302	-2.07312	-2.83252	-10.8808		-69.9529	-54.0301	-10.3581	-87.7845
-4.61681	44.12	-8.19878	17.5499		-36.16	-103.502	55.9759	45.3366
-5.25973	25.1646	8.56391	20.1146		1.04404	8.61518	-74.7167	-89.2581
20.0872	40.2253	1.14023	-17.1829		-36.4228	17.2367	-18.6814	30.7022
1.48778	22.8648	-7.48004	16.3196		-10.9776	29.2416	17.6386	26.7923
-13.8484	27.1508	8.14614	17.7822		4.57702	39.7191	-15.5639	48.7168
-3.64407	19.8171	-22.7507	38.8916		-14.3777	-40.4977	-6.56852	74.6143
0.549201	-10.9746	-1.03188	32.513		-18.3209	-6.2759	-26.468	-16.9143
-5.98557	4.58996	-0.997657	13.9492		-1.60723	-37.2662	-60.7441	-65.7441
0.424443	-15.3033	8.92199	41.8817		-15.3551	34.7408	-6.49752	91.2035
-7.98615	13.081	173.184	159.184		-22.9389	57.8709	-97.3956	-102.396
0.426316	35.7003	-12.1329	9.93733		3.1207	9.14322	-3.37271	-9.39523
-11.8243	39.117	-8.56358	40.82		74.2987	134.639	-8.32515	25.5088
10.2466	-2.32474	-36.9887	44.3093		24.8004	122.136	-8.51684	-20.1235
47.3575	21.946	-1.35052	10.7501		-19.3448	-25.3448	-69.4502	-60.3307
-49.186	124.209	-16.0048	22.5637		48.4107	-13.0882	-74.5294	18.3823
-7.50424	11.7634	-5.97462	2.76302		8.79157	116.513	40.6128	19.4666
-6.46041	12.7352	10.7755	25.4214		-4.17373	6.66681	-16.1196	55.0976
10.5856	-15.9753	-8.50509	2.47934		17.9626	7.47741	3.52255	-6.63325
-22.135	90.716	-9.89218	-1.58286		-31.7331	53.2423	35.2512	22.0318
-12.2218	13.5269	17.0307	12.0307		1.67039	-9.88025	1.85838	10.5634
-3.58993	8.51071	2.68687	25.4047		-38.5423	-31.2882	76.7921	125.418
-28.1614	4.13478	-7.64855	5.58223		-70.3404	24.373	12.8018	-3.87921
0.558273	16.5546	0.276021	9.27602		0.539197	-34.6029	-38.5887	-13.235
-18.873	49.1073	-6.27576	3.27794		-21.2255	19.2367	-62.2209	-23.5077
9.02627	51.3187	-12.2877	22.8544		37.738	111.814	4.77906	19.425
-12.7232	22.9358	-7.04451	67.0312		50.398	16.8531	-36.61	-59.0049
2.12307	13.1231	-7.12734	5.33664		-12.6986	4.77666	120.802	130.958
-5.14373	17.9774	-18.1304	-8.13036		12.8564	20.1106	-78.589	2.22079
-3.70428	3.89527	-2.68117	-24.7514		-13.5968	44.9734	-60.5195	-54.7707
6.12908	-3.87092	-2.34404	-11.177		15.7443	-1.44089	-25.3157	31.1227
1.89699	11.533	3.33499	-8.02172		-65.6843	-77.3446	7.85643	-25.8143
6.85889	1.85889	-59.1151	2.2968		3.44804	17.9688	-28.1083	80.6353
1.23126	9.93623	-9.96343	15.3902		-14.4625	62.9639	-77.6922	-98.7594
-28.003	13.7713	-5.87056	-0.121774		-62.3191	-28.7267	112.607	59.2399
-5.2907	5.7093	-39.4794	18.3733		-5.56948	10.3896	0.923708	-27.8449
25.2341	16.8026	107.953	96.9533		-2.6507	-16.4478	-11.0917	-0.116668
-67.5382	-57.5382	-18.5695	4.63841		-114.859	27.0103	-3.63803	43.2181
1.60778	40.1762	-21.4634	34.7028		-135.818	-124.843	-37.9152	74.5139
-22.3691	42.5214	-8.00985	-0.782824		-64.312	-75.8096	10.5765	29.1691
10.0131	-13.7865	-2.63661	2.36339		14.8098	41.4312	-12.0617	-45.6541
21.2623	4.56699	10.9963	31.1345		-74.0559	-79.8046	31.1672	52.3134
-4.31887	5.68113	-8.20162	-0.630477		36.5233	1.38122	-13.4233	-5.4619
15.2115	9.4627	107.642	162.622		-95.1688	44.2259	-32.1282	-37.1756
51.3965	40.3965	-56.412	-36.0066		2.04343	-11.176	-12.0556	24.2775
0.666491	-5.08229	8.28057	-20.895		90.7004	68.6301	-15.2611	55.4477
-13.0937	31.3135	-5.94682	3.25124		64.7611	85.9074	-22.8741	19.4183
-0.737482	24.6739	-6.1643	20.5192		8.29905	-8.64185	-26.9463	-16.4611
4.64294	18.4918	-8.98262	27.8328		16.2793	83.9472	-57.2707	-50.2806
59.1698	80.237	89.4489	104.396		10.0058	25.205	-35.5018	-3.36147
-6.13775	6.53907	-7.47476	5.80568		-41.915	58.7393	56.3219	5.571
6.75708	1.75708	-9.02469	24.5202		-119.306	-130.306	-10.2347	4.96438
-28.3918	32.9673	-9.72368	11.4225		-6.2473	7.63312	-6.27403	13.8183
-4.17802	3.42154	10.947	0.59921		-53.1511	35.8704	-15.0057	23.5296
2.0521	9.30625	-12.299	0.931761		-131.095	-136.095	-38.2993	-6.27907
6.01813	-0.351002	-9.68872	22.3315		5.84825	16.8739	-62.4256	-42.2875
14.385	5.55199	-9.80269	-15.8027		0.997236	16.0101	43.0098	55.6571
-4.5644	44.1724	-2.69565	4.53137		-65.8929	14.9169	87.2645	104.026
-20.0269	44.2539	-10.967	4.46892		3.88035	-2.11965	-93.2834	-65.7987
7.75473	29.0034	-6.59522	2.14242		-15.2507	-32.9983	10.5103	-3.37012
3.32246	16.6673	0.525775	11.0109		7.49668	38.1048	-6.14934	-22.8303
-0.203992	13.6568	-26.7282	35.5869		-12.6114	-19.6114	-4.75109	31.4222
-13.2153	11.2155	-2.27168	7.28202		66.7669	80.6797	45.0277	4.56553
2.00162	-9.35509	4.86094	-1.13906		-11.3693	96.1018	14.8249	3.82485
5.61599	-7.38401	-45.22	45.1885		22.3134	-9.70684	-10.3102	1.21353
5.88747	11.91	-58.1372	-52.1147		-21.3824	22.381	92.5425	173.84
-1.98163	14.7137	0.843597	27.4273		6.34632	19.4038	73.3575	80.6116
-4.51829	56.9806	17.2897	-8.12173		-22.209	-13.0474	-14.4616	-68.3348
-8.84665	14.2745	-12.1046	8.005		93.8808	78.647	-18.1156	33.309
-14.0036	-23.0036	-98.4378	-84.5889		-57.2455	121.773	-40.9137	53.7996
-56.6641	-63.6641	-9.12331	41.6276		23.1464	15.185	23.7314	13.7314
-7.80017	11.6777	8.12736	-2.51201		-3.71895	29.3865	-17.9042	18.9112
-9.57952	-2.3525	-7.40602	3.56897		43.1293	49.1293	-49.553	-17.4874
-10.6208	18.9421	-7.5207	-1.5207		-63.1513	76.8595	-50.937	12.5562
-15.4659	-6.26781	-17.1522	3.91492		-0.895571	10.1301	61.5916	71.1894
4.83985	-9.00901	-66.0938	-41.8717		31.8956	20.2354	88.0094	94.0094
-1.93923	8.20223	-8.40895	33.9199		2.5957	17.1371	30.9744	103.976
-11.8407	11.6205	-13.757	0.0400915		-1.98359	5.98467	33.5782	38.5782
-3.2209	22.1546	49.3966	68.8745		-63.0176	-36.4339	30.6252	148.306
-2.23649	6.58404	68.1333	75.3874		-110.308	-95.3613	-13.4787	-23.4787
-87.7348	-102.189	67.1044	79.1044		-12.2571	-4.65757	-20.8709	-3.1233
0.761174	9.1927	8.31356	-7.62297		-9.74983	136.928	-127.351	-38.6622
5.8199	18.617	-60.4011	-32.4471		34.6813	60.152	-65.1237	-59.1237
5.93788	-5.5859	-16.149	-8.1876		-6.30251	2.69749	-35.9876	-46.972
-7.27232	29.5431	-1.17877	29.6495		7.1324	-4.91263	-27.567	84.7654
-28.3677	33.1312	9.03812	73.4653		-0.486771	-10.4868	-69.678	-85.6371
-3.30937	9.3092	-7.33107	14.7392		24.5198	29.5198	-86.277	44.705
-17.4955	14.5247	139.161	172.677		2.66898	-12.5432	-7.61206	21.6049
-17.2907	16.2253	-24.8105	12.1431		17.7467	-3.63028	-119.045	-132.294
-4.66305	13.7288	10.1886	21.7392		-8.73244	-21.1964	-145.702	-138.475
-8.19581	13.8745	-0.294738	41.4796		-26.3838	-12.0532	-14.9171	0.316698
-5.48008	13.7155	-14.2328	17.8328		-6.87036	13.9208	8.48843	33.8421
-15.9515	10.5101	-14.7504	8.46283		-64.5018	-78.7693	66.0174	58.4462
-8.85638	4.42406	-17.8785	31.2088		30.2828	132.636	97.683	102.683
1.27366	9.61417	-8.45447	13.6986		45.8256	57.8981	4.34943	11.248
7.34619	17.3462	-4.27911	4.87458		-23.6733	-30.9003	-6.41822	46.9947
-18.399	8.28445	0.687565	-8.46613		20.8847	109.906	84.3821	97.4396
1.36613	39.7573	-32.7476	-4.89806		-41.0161	42.9182	88.287	123.946
-1.27881	20.8743	-17.6251	-0.0691386		-17.5687	-36.0497	92.1834	168.661
-160.574	-154.77	-10.2953	6.32332		2.78744	10.0145	127.199	138.723
6.68415	11.6842	94.8412	88.8412		20.5232	-0.622978	4.45199	26.1373
2.62846	-3.12032	-9.56829	-1.56829		-57.9792	34.1386	-53.1163	28.882
4.5243	-3.78502	-0.154828	28.0644		-0.123475	13.1261	-15.9377	-4.79172
-5.63098	43.7526	11.9272	-7.91898		1.07298	-9.90201	-16.855	-5.3044
-8.16004	10.1473	-22.3713	26.3656		-0.838157	13.7032	-125.834	-115.834
4.26344	35.2778	-23.5749	-14.87		-3.57009	4.47821	90.5081	56.992
-73.9524	31.9606	-45.3408	11.4384		-2.03259	31.3581	-100.993	-70.4544
15.2768	146.444	40.7366	46.4854		-4.69307	-15.6931	36.8005	57.5002
-84.0754	-76.4758	-11.3986	14.0721		-22.0422	11.8396	-14.8339	-6.09624
-22.3577	16.3554	-10.2173	20.4623		3.43275	11.3644	-76.5439	94.5805
-0.642457	10.342	-16.1346	7.32666		-79.3939	-62.6749	-14.1944	-6.5119
-2.54995	12.0253	-9.39448	54.6459		-26.5251	-14.48	48.3303	97.0671
23.2887	16.0617	-14.8584	6.51854		51.6806	-0.0545039	-54.7143	-70.7106
-25.7552	11.0602	-7.87535	29.0783		-13.4376	-51.3333	1.43079	42.4299
-6.41777	9.01814	-3.19249	6.36121		-107.717	34.6845	13.0876	18.8364
11.5445	22.5445	-9.62782	1.45127		2.59339	11.2984	-89.6345	-106.111
-31.4788	-69.542	-22.7611	36.6377		26.1209	-9.02118	64.6149	33.6005
-13.0959	6.09974	-18.7777	6.93454		6.14443	-2.97504	-10.057	7.58409
-1.16631	7.53867	-6.68674	-0.664219		18.3534	-27.889	-15.1924	-99.8501
-7.62147	13.4457	-12.2035	4.49188		-0.468302	-20.2271	-1.87679	-14.6151
-10.315	12.8929	-2.98103	30.6897		14.9001	-6.781	24.5799	-5.98491
-1.94295	11.3375	76.9819	154.585		8.92791	0.966496	-6.28003	19.1907
4.54972	23.1161	-17.7067	10.1428		-41.7623	65.9595	95.0229	119.224
2.93866	38.5473	-26.9619	-1.4912		-2.18266	27.2444	-54.381	103.61
-119.834	-130.834	-40.4638	-29.9876		-38.1599	-1.51368	-20.385	20.0772
-63.8924	-2.25003	3.0797	-11.5662		-4.66961	-35.2344	-111.853	48.417
-4.11061	3.82104	6.19198	-2.92749		-82.2588	-40.6684	-72.1494	-11.8088
-123.975	-134.975	-7.89323	6.01956		-85.7187	49.8944	32.3176	51.5132
-44.3421	95.0526	-4.49343	4.66026		-38.0785	-12.3662	42.4218	95.0897
-19.7068	13.8381	-7.64147	6.21931		-113.84	-95.5165	-5.93335	3.32024
-48.8094	32.6781	-12.8059	7.30367		-25.5727	13.3831	-12.9716	6.22396
-6.93842	20.9111	2.2117	-9.39493		-10.5565	5.38001	3.40469	-7.23469
-10.7135	9.39614	5.20376	16.1882		4.31364	32.2677	123.111	141.46
-7.83725	29.5196	-36.2092	0.606259		-39.8109	-18.0298	4.3998	50.0453
-14.2558	7.8145	-5.39441	0.628104		-68.9839	52.2545	46.2999	52.0487
-60.4792	-72.5798	-6.95863	2.16083		-82.6375	-29.47	31.3007	20.275
-169.545	-92.4081	-7.27505	1.55795		-75.4701	-67.0386	15.4101	23.4101
-106.905	-149.197	-13.4963	10.8167		54.5697	-13.821	4.42654	19.1609
0.976803	-12.0232	-40.1044	16.0618		-8.22759	38.2941	63.3216	75.3216
-0.481564	13.7859	9.66235	24.1831		-99.6726	19.8421	-5.42999	5.04617
-18.9921	-27.9921	-11.5835	2.93731		-9.05948	78.4845	-52.821	17.7878
13.8164	-1.1965	-10.7512	4.46101		4.03573	75.3537	-3.26537	5.73463
-41.0526	-30.0682	-3.99429	3.25985		6.00856	-1.21846	-10.231	-0.594964
13.1136	-12.4805	-31.1117	11.8397		-38.6477	-26.6477	-41.3898	12.0988
-22.8488	22.9984	-17.208	14.9324		-31.6709	-5.20936	-40.8155	8.03503
0.550457	11.6964	-11.2841	7.91154		-146.16	-124.09	-31.3974	-10.2512
-11.6605	34.5818	-41.0046	66.3144		127.877	161.469	-51.4976	-2.8716
0.949537	54.117	-8.76708	2.21735		-5.1728	5.17502	-17.5842	-26.8247
25.7633	4.48457	-4.2121	15.973		-3.88119	52.075	33.1028	-18.3218
-12.4203	11.8927	3.04081	10.295		8.93081	3.18203	-22.2876	36.8381
20.2915	-3.50814	-13.1534	11.425		-35.3628	-3.22239	-11.2422	2.60662
-78.1731	63.5743	-17.4456	6.77653		35.2992	-1.51621	7.69242	30.8136
8.50812	-0.271866	-27.6854	48.7924		-29.0532	-3.79431	5.61795	-4.07626
3.30445	52.3917	-0.325416	-12.3979		34.9318	28.0333	-117.207	-4.61852
-4.25893	0.74107	3.41708	-8.58292		44.0005	53.0005	-30.1271	-44.6684
10.7256	22.2762	-9.00989	-0.700569		2.19387	-16.9135	-42.8682	-12.04
-58.9037	-41.6425	-3.34029	-9.64957		6.73569	-2.94482	20.5123	-26.0093
-23.7016	0.554832	-8.37627	-0.414858		-3.27349	43.2482	48.239	68.3486
-22.5416	21.7646	82.888	87.888		21.032	29.3725	2.8272	13.8272
-152.883	-157.66	2.01088	-3.98912		6.58433	15.2893	-55.0468	-33.9006
16.9838	-15.5073	-5.37522	48.1134		-20.2992	18.414	-72.365	98.7594
0.211472	20.6168	-8.56478	2.41965		-14.3181	7.83499	-2.57078	4.41934
-43.2547	68.6577	-3.79863	2.00469		-35.9152	-29.9152	-4.90573	6.09427
-32.2154	-44.8627	-5.42085	12.8181		-32.9247	-45.0254	-11.3976	10.6727
-8.72841	1.28019	-17.4337	9.24979		-36.8621	19.9171	4.07438	-25.5303
7.73198	0.504957	-20.8925	23.4137		22.8212	-6.78355	3.17288	-30.5268
-13.9741	-58.2803	-22.0838	-11.5986		-4.61859	-13.7723	-1.46933	-12.9669
-3.64459	9.76182	23.9523	40.8932		-6.03806	15.6473	5.95191	18.5705
-7.16581	26.4266	-3.08951	-9.39879		-69.2368	-49.0987	-25.7924	48.1784
2.2766	12.2766	-23.94	30.2585		20.3581	-1.42309	43.7093	72.8598
2.29452	19.7045	-5.82236	1.17764		21.3148	28.9144	4.98775	-5.15371
-2.52831	9.57233	-12.0983	-0.4381		82.9353	68.3939	22.5799	44.733
-4.39497	25.1679	-19.4074	19.7283		-20.6253	-3.13501	5.16803	-4.84058
-8.67238	5.84839	-25.88	-20.88		-69.4091	-60.4091	-35.9933	-27.2556
-5.32267	9.9466	-4.31772	6.66671		-78.0998	-82.0998	14.81	-1.36091
-4.10064	32.6832	-7.01665	6.21413		-77.0636	-84.3178	3.80414	-12.6583
-6.88156	36.8819	-6.62841	14.7184		13.2895	18.2895	-60.0048	-6.51618
-36.8373	-20.1563	0.270686	-14.7422		-4.09464	-9.09464	83.4379	76.5394
-117.609	-58.9052	-9.37029	-2.44586		14.8705	41.554	-4.30971	-14.3097
4.98076	-3.75689	4.13003	55.1152		23.4658	38.0411	-20.9584	1.09289
-20.8816	18.0193	16.9172	-9.70426		-52.9015	12.2885	-5.54709	3.6066
14.0595	-12.7533	-8.35027	-3.35027		-16.5309	22.1823	-4.50898	4.49102
-1.2613	7.89239	-1.18866	-8.41568		13.5207	6.26655	9.97579	-7.58017
13.3995	3.84579	-8.58084	24.8099		-41.4709	-6.32879	70.3023	46.0458
-9.10286	15.2101	-2.59947	12.6127		19.2492	40.596	-123.465	-99.0337
-20.0101	28.6159	-5.30806	3.84563		54.4393	45.7017	6.91801	-2.71801
-16.9652	24.0339	-5.98188	23.1687		15.4016	28.6511	9.93364	-6.23727
42.0439	13.0023	-13.7083	6.40133		6.821	-18.6497	-45.9001	-29.941
7.65396	33.4026	-9.12892	3.5005		46.3943	62.3906	-22.2802	10.6795
1.53708	43.3114	-0.431157	28.8539		-0.407533	-18.7994	78.305	107.481
-1.85021	-22.3268	4.01104	-11.9481		-58.5954	15.3118	8.856	-0.697701
-8.7267	17.8947	-24.0563	12.8973		-53.6333	34.2976	-20.9229	43.3579
-33.8746	-7.29087	37.2616	54.9026		8.2355	-0.883965	88.8117	56.6713
15.1914	-4.35451	-11.5972	23.5947		-72.0549	-31.8357	16.8407	51.9829
1.42357	22.5206	-16.0472	-6.04721		14.7795	7.78943	-6.74057	22.0528
-38.1784	13.2462	0.267607	14.8429		-68.8889	48.8936	-116.184	13.5676
33.0477	-5.34349	-6.62841	18.8423		16.0489	36.4254	-34.5624	-18.6991
8.98919	70.9303	-2.37029	3.62971		-23.8363	-7.43221	-64.1407	43.1783
-4.88163	6.47508	-3.75168	4.9533		-42.8795	3.57627	9.56846	-19.6072
0.0747609	10.0748	6.13167	-4.70886		-62.4409	6.93615	-0.831255	10.1687
24.6995	-7.79165	-6.80486	0.0936854		-31.706	-63.579	-15.1598	-4.15983
11.6127	27.0486	-6.9495	1.01191		-28.0554	20.3888	-13.9915	-6.99152
7.71675	-0.283246	87.5924	74.5924		-44.2603	9.35303	-0.114416	12.8856
-103.879	-88.6801	17.3901	52.502		-71.9249	-10.426	-111.469	18.9108
-9.88231	-2.31117	22.0587	34.6881		-50.424	-56.1727	0.225607	25.6011
-4.27989	13.2104	-18.1421	15.4028		34.5335	-0.447108	-12.175	10.2199
-0.946299	11.7305	-9.07239	11.9948		-44.5367	17.1057	-3.81218	4.8928
-10.7453	-5.74533	-4.32197	10.1988		6.33638	-20.6002	-54.5824	34.8501
-29.5492	-1.59515	-39.4928	-51.0435		12.6602	40.5098	-70.1394	15.2282
-30.5404	-20.5404	3.3279	80.7543		-2.45075	-50.481	61.6522	35.0684
13.1881	7.4393	-16.4472	6.76077		-73.0638	12.1052	27.9102	5.85885
2.28664	11.2866	-10.2476	0.237531		-3.48516	17.6611	-14.1175	21.0744
-6.77736	28.4967	-2.45319	15.8699		8.86035	-16.1827	-101.374	14.3539
-7.40143	11.7942	-6.1286	10.7884		-1.68191	15.874	-15.911	-2.11387
-11.4084	-3.83723	3.3955	-6.76031		16.3351	-22.288	-63.2757	-20.788
-3.26464	13.4307	-100.137	-90.2591		-9.21309	14.6917	-5.46821	45.5893
-23.732	4.52714	-7.07379	7.51402		-39.5882	8.85598	-44.3048	-56.4641
6.42015	0.397629	-9.84297	-0.148767		30.5469	54.8033	-27.9213	79.5498
-20.5384	21.8504	16.0465	6.89281		80.5082	6.60098	98.6065	116.998
6.98876	-1.74889	-27.9108	60.7779		36.7495	-1.64171	129.208	98.1933
-10.9515	31.4373	17.0526	3.25551		53.5901	28.1787	65.2215	94.3971
-2.65371	36.482	-11.6678	7.52783		48.4853	41.2312	2.58013	16.8476
-6.85519	14.212	12.4236	36.8544		-22.8624	13.7839	-42.9319	19.3832
-11.5618	12.6603	-21.1716	-30.4252		-17.2731	25.2145	83.5486	96.5486
-0.903136	5.09686	-13.7076	9.5003		-33.9585	21.7406	-21.2232	-6.21025
-9.06337	-1.80923	-6.42283	4.60282		-31.1895	-15.0929	93.6572	103.657
-18.6483	-11.7239	5.3913	-14.6259		34.3728	80.6152	-14.572	-7.00089
1.03627	16.3796	-35.8151	26.4999		53.439	22.9005	-11.7781	-46.43
-3.97526	4.02474	-12.6867	7.49842		-20.8234	2.38455	49.9287	43.2563
3.87843	-9.12157	-5.93924	8.79509		18.2039	31.4233	63.2	49.2
14.6583	0.809469	-9.04692	4.63228		0.765503	-5.25701	-15.1746	-3.65084
60.957	-6.13274	-6.35746	-0.35746		-0.411632	12.5884	11.6902	-5.78506
4.42744	31.1109	17.055	-12.1206		-1.40549	20.7476	-29.34	59.8843
-9.26531	59.364	-101.179	-94.1793		-18.2922	-9.17269	141.5	106.388
11.433	5.41047	-1.93261	43.0639		-151.427	-140.281	-15.8942	9.51727
5.60275	-8.85129	-4.13739	3.43375		-113.707	-120.631	82.8696	101.219
-38.5581	2.19504	-10.9956	-1.8761		-170.407	-174.407	1.1692	13.7878
-2.38387	-19.8592	10.4215	5.42148		3.52806	-6.95711	92.3269	70.2756
-11.062	-0.0619854	-18.5739	10.6017		-76.926	-51.5505	-79.3365	-67.264
-3.41908	7.42145	3.93094	27.8357		-19.7911	-26.7911	-74.3167	59.3305
2.2607	24.312	-6.10531	0.819118		-86.2149	-77.5099	74.5299	90.3932
-17.2608	10.9983	146.72	155.425		-11.4076	-1.26615	-41.8172	23.0733
-0.177694	8.82231	16.8437	27.9897		-39.3713	-22.6133	1.00674	26.4993
-6.91134	26.6047	-12.5479	35.271		29.9498	18.9498	-22.2497	-8.24968
12.805	2.80502	-24.5668	9.10395		-64.4276	-57.4276	14.2974	0.252663
7.3181	-4.20568	-6.37303	-15.6135		-61.8582	-119.456	20.836	37.594
1.47205	16.6842	-10.2771	6.48092		13.9549	0.954921	-20.5796	6.23324
-10.3535	26.4619	-5.04101	4.11268		-0.71049	10.797	-7.44113	4.10951
16.275	-20.5927	-9.31154	-0.606566		109.647	130.994	-15.9902	60.4876
39.6474	-33.9835	-12.0671	-3.06714		0.397017	10.4056	-4.43716	1.56284
33.8889	5.79938	-14.5447	0.72454		-2.2512	8.09661	3.15589	14.1815
-18.2546	1.10638	-25.5517	32.301		84.4675	78.0984	-2.74497	12.5243
2.59858	-68.6186	-8.96002	9.43187		-35.7904	-43.0174	-30.2811	20.8955
-1.353	18.1249	-8.97863	28.1541		110.44	97.7932	-19.5125	-6.29311
-1.29677	6.63488	-6.24094	8.99281		-20.549	-6.00761	-23.9145	-35.4219
-28.2984	18.1574	5.3204	33.9871		9.76652	-2.80487	-95.3372	22.8873
-24.5637	21.958	-4.23102	10.3442		-6.55108	3.59038	-36.7335	-19.2184
7.39928	-3.95743	-12.7752	12.6955		-8.04878	23.9714	6.09602	27.2604
-0.910511	18.5674	95.8918	88.6648		1.85303	9.17598	-5.03753	6.96247
-0.13662	26.4848	-35.8605	5.13868		4.03398	-1.96602	-65.0268	42.695
5.44955	29.8804	-5.60028	9.04562		-16.7769	34.1645	1.79734	30.973
18.9234	77.6271	7.80422	1.7817		-10.6897	0.667034	-8.20251	53.2093
-17.7661	14.2541	-86.3178	-52.436		-4.86471	-12.0917	-67.3018	13.508
-21.7664	-6.76641	-29.6128	-8.44839		-5.69079	23.4597	-17.8191	11.3565
-2.15669	5.41445	102.867	117.814		-8.62506	13.528	-45.6366	-27.0703
-42.613	67.8549	-6.97587	15.8424		15.6784	24.1099	-8.03247	-2.00995
3.22502	22.4478	-4.43068	4.34931		0.799702	20.0225	-15.0201	-21.0201
-27.8808	44.7997	-6.48577	22.6898		-1.32922	154.957	-67.4906	-75.0617
1.67273	13.1802	-0.484513	-7.71153		-36.0505	15.6846	-87.2624	16.5386
-10.4976	-0.149757	67.3994	52.7535		-0.622068	-13.8716	-3.40554	20.8509
-2.01858	33.0933	-26.9955	157.931		-41.7459	-16.2752	-30.7265	20.45
1.83215	12.8321	45.2891	96.3465		-79.7104	-93.3294	-12.859	39.6222
-1.50284	12.8277	64.7041	53.7041		-5.01063	5.98937	-39.1809	9.48694
-4.73822	8.48119	-4.22185	29.323		-68.2046	-75.7758	-72.7435	12.6241
-4.11163	57.2474	-17.5346	-26.6541		2.26458	18.2609	-2.73208	4.16646
2.93068	8.93068	-8.23105	-15.4581		11.8789	26.3872	18.3782	5.73091
-3.37883	46.717	-113.205	-100.467		0.189697	13.2472	-9.36594	13.842
-5.1541	11.4645	15.6803	49.351		-2.81057	-8.55936	-121.973	20.4284
-1.302	42.8386	46.8265	59.8265		-11.9702	21.6222	-26.8373	-15.3397
-6.51449	39.131	29.2894	71.0637		-19.918	-1.5261	4.70255	25.8488
-12.7168	10.4912	-0.667468	8.11252		-3.239	-40.0228	39.2899	62.4978
-9.84598	16.9668	3.19366	-6.44237		11.2609	19.6014	-7.85732	-1.8348
5.45581	53.2748	-4.17517	6.31		32.7242	6.04073	-3.54281	15.6528
-5.54254	7.27262	-2.88004	25.009		-24.3411	-41.0991	-42.1402	14.639
4.02265	26.074	0.212176	8.17359		-71.8685	83.8329	-65.8057	36.6355
-11.0927	9.95636	-12.1144	3.32149		-2.34545	5.99506	-7.05733	13.035
-9.72435	34.4162	14.0241	-0.42992		-31.0384	165.266	-13.4649	54.8292
8.3947	19.5407	7.80078	19.2983		-36.6638	-48.7645	34.2043	54.4872
-15.8908	4.21886	-4.49912	6.99845		-13.8328	4.49029	-7.00002	-18.1303
-2.18747	9.91317	-75.2005	-91.2005		17.5259	12.5259	-53.3139	17.2948
-2.27699	5.29415	8.35692	18.8421		-13.0612	25.002	22.7482	34.7482
-3.58951	13.1295	-6.53182	2.2887		-3.64238	11.5567	-13.9112	9.29676
0.684514	11.6845	-14.5012	19.3327		0.363996	-10.611	24.4006	37.458
-22.3523	44.1642	11.2915	17.2915		27.446	15.3735	44.8117	50.5605
-1.80607	6.8989	-13.6303	14.1953		-3.50997	3.74417	-20.1891	10.4904
0.146479	22.1978	-34.9448	57.9669		-32.1412	6.42726	-109.26	20.4915
-20.159	33.208	-19.0945	4.02667		-9.6525	67.9503	-72.6102	-26.1543
-16.9846	25.3079	-5.30317	3.8163		42.5464	24.1545	8.20931	13.0273
-9.65755	4.38721	-8.53178	-3.04429		8.43795	-3.11269	-8.84765	33.5412
-11.8572	21.2482	8.01539	-6.99752		-64.0303	-55.0303	-13.0698	12.2838
-3.47148	9.20534	-11.2032	20.8624		-45.9446	-6.06901	1.54607	12.3866
-10.9227	14.4309	-31.8763	66.0474		5.29212	21.7688	-3.4846	25.6659
4.0081	-6.56743	-7.97604	3.04962		-80.8231	-13.3282	-59.8202	1.8221
-12.5147	10.6933	-18.9531	14.7176		5.30025	-11.4578	-2.91277	74.2241
1.03639	12.062	36.0399	28.4403		0.161777	-8.57587	-16.1572	-33.5672
-6.32247	5.75002	-12.09	3.1222		-0.234185	4.76581	17.8912	34.5099
-11.2002	17.5932	-3.76429	3.9182		-7.80384	-19.8763	-42.7946	10.694
-2.83526	9.38016	36.1995	27.0458		-5.59809	0.424426	-11.5661	16.388
-7.3138	16.9083	44.1209	25.5283		-19.694	33.9193	-8.33549	52.0052
-24.8377	19.5695	-1.30448	-32.1763		-101.461	33.96	-14.2449	-5.09125
-14.2492	16.3157	-11.4454	2.46743		-83.8555	-96.5323	-67.6622	76.2936
-11.6492	13.7262	74.6438	149.702		-5.30189	-17.4025	9.79369	55.4392
-6.68555	29.4877	-15.7899	12.4692		-26.1255	76.7001	7.2291	19.3297
12.3448	-2.60202	98.8589	103.677		32.4112	12.2261	13.6221	6.02254
-18.6621	1.44747	-9.34766	29.0435		-7.12076	10.3545	27.3636	8.7972
-82.9571	48.6677	-4.60711	22.2057		8.33264	20.2301	1.46009	-16.055
-2.09739	23.1615	-10.9331	24.3409		7.3879	-16.8685	-24.0251	65.4073
-9.55757	-20.0427	5.54819	-11.3149		-67.5639	-73.3126	13.9012	-1.11166
-0.715456	8.40401	20.5937	26.6162		18.4308	39.7776	-43.4992	-5.43604
-5.13977	-12.0642	9.54954	-8.75785		-55.1898	-82.1264	-10.0458	43.5676
4.21923	-3.35191	-5.38703	5.63862		6.56794	-5.09227	0.204866	19.6553
-1.19189	8.36181	11.6431	-5.54214		86.1586	91.1586	2.62694	-11.2219
-8.94077	-20.0867	49.4251	58.4251		-4.81405	19.499	-24.806	-16.806
-2.10612	9.89388	-8.86919	0.825012		11.5367	1.983	1.05226	23.1225
-15.9	16.0926	0.0600845	-21.9912		-1.18844	46.1151	-53.713	-60.9671
-14.4754	-6.47544	-43.945	-49.945		7.45364	-48.7126	63.3222	74.846
-9.06595	-15.9645	5.36804	14.368		-22.9964	7.0353	0.581291	-6.67285
-13.7935	33.1289	-27.1051	18.7421		-65.0609	91.2249	-67.5853	-35.5651
11.1849	-2.43412	-16.8747	16.7961		44.519	32.4465	-76.3194	-25.2619
-37.755	43.5429	-7.22832	-0.00129892		-15.7751	7.43281	77.7626	71.7626
-23.7754	6.389	-2.19911	6.53853		-0.763427	102.062	38.5773	45.4759
0.264168	8.19582	1.42483	45.5654		97.9739	23.8983	23.6415	35.714
-10.0048	16.9699	-6.98182	-0.0832811		-8.41447	17.0562	-2.81407	-38.0881
-6.39591	2.30906	-14.0075	25.1282		-2.74451	11.3003	-42.446	86.8201
-12.512	2.488	-4.32368	7.22697		-6.02623	5.33049	101.168	90.1684
-5.55542	3.14955	-20.5939	10.0856		-61.031	20.4565	-89.4688	-38.4836
-9.30224	18.7873	7.22368	-5.2403		-41.5604	87.8889	54.8552	63.9746
18.397	5.93306	-4.38715	11.5494		-47.2179	-59.3185	-25.4669	8.20381
-1.00904	31.4821	5.97736	-1.59378		92.0016	78.0888	-56.9182	-40.9954
4.40795	8.40795	-66.6757	-3.23708		-12.7347	-34.8878	-61.7457	-70.5787
-4.78759	-19.2416	10.2906	1.17114		87.6978	57.0183	18.8783	10.4468
-3.27311	17.1034	98.0589	106.892		-4.23067	4.76933	2.37996	-8.60447
-3.11698	7.88302	-25.7615	5.70021		3.173	-3.19613	-14.7064	-5.58689
3.58331	11.9238	-11.5213	4.19293		83.3143	61.263	-1.95486	-10.0032
-7.34702	4.00969	-8.85033	3.94674		-31.5598	33.3307	10.6294	-15.9543
-4.98581	33.0774	-11.3807	-33.6412		-10.5501	-1.5501	-19.8335	-39.5923
-5.76975	-18.4171	-2.63725	8.44185		-93.4247	42.5047	-68.1696	-74.1921
-5.1895	28.8487	-1.09876	9.42576		-2.13913	6.86087	-56.621	-96.8403
-6.72673	6.27327	-6.65243	55.2887		-11.6993	10.4538	-54.9378	-100.785
3.63059	42.5314	-18.696	19.8725		51.8896	41.8896	-9.95226	-2.69811
3.8438	52.5806	-3.53114	4.46886		-24.0172	12.9364	28.5454	35.7724
6.33959	26.745	-54.9804	51.8455		1.32961	13.9482	-7.26273	2.89307
29.2073	12.2903	-23.4409	40.5995		28.4912	43.2047	-16.5137	-4.96306
-5.32659	11.3688	-2.52734	5.47266		-4.536	3.06355	-46.3461	37.2189
14.2169	3.21689	-13.1486	24.2083		-74.4342	-63.4342	33.0467	114.23
12.5037	37.7625	-16.347	26.3466		0.169551	22.3227	46.1095	68.4015
4.58004	53.6673	-17.8793	-6.3555		-6.95632	4.65031	41.3142	58.8045
0.999409	8.22643	28.9777	39.6021		-5.44384	-21.4402	-27.5918	-17.8976
7.97465	30.026	-6.52522	4.47478		22.9904	14.2528	23.4152	37.936
-10.0773	7.47866	-5.40771	0.592288		-61.7658	22.1685	13.024	23.999
5.99607	-4.00393	-3.63516	3.26338		-26.3756	22.7116	-2.41238	99.9407
-2.5287	4.69832	-44.8793	61.9465		30.44	76.9617	97.2746	108.631
-16.1339	19.0083	-12.8387	16.3369		-20.5654	-16.5654	-5.73869	2.30961
-6.42154	4.41899	-8.56642	4.49104		9.08025	0.342611	30.5773	37.4759
1.6699	15.5307	-9.04788	1.79265		-0.961132	12.2884	-15.2867	-43.2408
-4.3346	2.91954	-8.93026	4.30053		-0.892139	-9.62978	8.50692	-9.73201
6.63019	0.630185	-18.544	36.6792		68.4969	57.5219	-71.3939	-64.3939
-2.3681	2.6319	107.935	125.491		-22.3981	7.76636	-71.0192	-81.1606
-15.3703	20.2887	93.7158	132.339		-4.93509	-17.0357	-30.2188	-41.3491
5.67696	-5.29803	-7.95152	7.76272		35.7563	4.15553	20.3307	113.804
-7.22782	3.77218	9.91485	24.5815		2.43628	29.1198	30.0765	18.5789
-11.9975	11.4638	-1.95632	10.6623		-12.4402	3.55613	4.09706	13.6508
11.2152	2.51025	-80.4475	-98.7549		-73.5347	-51.3816	49.0278	36.9553
-0.735181	37.328	-6.41562	6.04836		-6.03166	2.96834	-1.76675	4.23325
1.27991	-9.70452	89.0946	44.6874		-4.58558	6.44008	19.4551	-23.0325
5.41212	22.0931	3.29976	45.0741		24.2168	35.2425	-14.3923	-21.6193
-2.70757	12.5262	6.33201	-5.74047		-3.80597	17.3402	35.6322	86.6174
-0.0403477	15.9188	6.4925	-2.5075		-13.8434	8.51982	-10.2348	-47.1024
-4.25083	19.0696	-0.135544	11.362		-101.376	47.4596	10.4022	-1.09539
-0.484451	24.0592	-0.365538	-10.507		6.06751	-4.93249	11.3785	0.739167
-4.33724	10.805	-8.6543	4.57648		-39.8015	31.0722	3.44214	-40.965
-4.36406	6.63594	2.39181	-7.61679		16.5855	4.12153	-19.7258	-29.2795
-12.6301	1.89063	-4.59754	8.6829		12.4636	-7.9129	-91.9642	-104.779
-11.1585	72.4065	-12.0772	10.3176		-3.53626	4.46374	3.36892	-13.8163
-5.87689	53.2489	-8.40574	1.14796		-53.0244	-12.6543	35.1328	99.4688
-3.02207	13.4546	88.5231	117.317		-125.042	-131.411	98.8124	118.201
-6.17716	7.10328	-10.6785	22.8663		-120.561	-114.561	69.4238	59.7296
1.77153	18.7124	-14.3994	-2.87561		8.33153	-2.69413	-9.42269	4.3744
-3.22937	25.564	7.7758	14.1449		30.2049	-2.90054	-3.77695	-9.79946
-0.24438	38.1468	-20.4814	-12.0618		3.29027	9.96268	4.1657	-10.9766
11.6309	-2.28191	-6.75573	-0.755734		-14.6473	4.57548	-57.6352	-87.2399
17.6445	-7.7669	-24.2643	39.229		6.93902	-25.0537	-26.7328	14.8577
-11.614	21.902	-4.01837	0.981625		-7.42242	2.67244	-64.5349	-56.8524
12.3284	2.32835	-25.2404	15.2217		0.22768	-10.798	-6.93279	16.1884
4.52317	30.7586	35.2691	-15.4818		-1.65161	-17.6479	-56.2844	-42.3042
-10.6784	-4.36916	110.547	87.5325		-32.6487	25.204	-0.202789	98.8803
8.67713	20.7222	6.39935	17.3743		-51.9226	-57.9452	18.6546	30.2053
-60.4886	70.6786	-4.36044	7.16334		-0.817051	8.18295	-4.25648	6.74352
21.2483	9.089	-7.05015	29.8175		18.4911	-1.35507	-19.9128	4.30933
-94.6262	-114.736	0.722824	37.8555		-66.0686	-46.6182	-62.7993	-81.9066
13.7353	1.08793	-19.3341	-8.18814		10.2899	29.234	26.8594	35.8594
6.31409	38.6102	14.0887	5.7482		6.66696	87.78	-77.8465	-97.0421
-14.063	20.4662	-0.568234	8.16941		-1.11339	19.9357	-8.50577	3.59487
-12.9107	-0.292148	-0.747562	9.25244		8.05943	-81.373	85.0428	69.7736
-5.42768	21.2558	-13.7702	10.5428		-62.9113	-71.9113	-11.9873	-1.98726
-0.595366	25.6401	-5.13969	1.75885		-58.7283	-70.2521	-1.48287	-12.4829
-3.42313	21.9523	-116.984	-104.337		-66.9751	-76.8525	-37.9012	-50.5485
-4.20459	15.0631	-1.97659	6.72838		-10.6801	40.2613	-11.0367	5.90424
-18.8862	25.8402	-5.74326	11.7471		-12.8848	5.42256	-12.2412	-49.0567
-4.56288	11.3962	41.1789	12.5122		-8.50607	8.21296	33.311	6.84948
-3.24219	3.98483	-14.0856	12.5979		9.29293	-2.60454	-5.68573	50.7527
-20.2712	57.5126	4.64883	-10.5503		4.08968	20.5663	-76.9442	-82.9442
4.98493	51.8411	-9.48982	9.70578		-21.1781	5.79655	-38.2953	-49.2953
-8.54353	3.55712	-22.4071	50.5947		-4.84896	1.82345	82.5522	61.406
-1.9893	36.0739	-9.1997	-3.45091		-83.5559	17.5432	-1.10726	20.9943
4.76392	18.0444	68.749	80.9083		-1.15667	7.84333	-69.385	-54.3721
-0.753882	10.7536	-7.53209	1.7215		-5.08983	-21.0862	-28.7113	13.6176
-11.149	33.6407	26.8621	13.8046		-82.3182	93.5781	-89.1579	-9.03849
-6.84658	4.15342	-9.25597	9.09313		9.03656	-1.44861	-31.6977	14.824
6.4651	-3.5349	-7.19172	0.379423		5.12244	-0.877562	-30.7424	2.80242
-7.60342	14.7914	-20.4397	29.8776		8.80164	-1.19836	-22.4244	-2.3148
-1.53339	27.6422	-82.7993	14.5364		-25.0901	-34.0901	50.7987	134.733
30.3257	-1.73989	74.3067	69.2593		-34.1004	-43.9779	49.5905	63.4709
-125.21	-135.785	4.7892	-5.78633		-45.808	3.34864	-121.424	-129.764
-35.9144	4.64219	-11.9999	-27.2121		1.96406	20.9082	-10.4544	-24.785
15.5075	0.494628	-21.555	16.9803		49.1375	36.519	-47.9673	-41.0688
-0.506225	45.7361	46.0583	-7.10918		-9.57147	11.5747	-18.1787	114.88
-4.91756	23.0365	-5.40976	3.59024		-7.82344	1.17656	-13.5852	121.836
-0.328493	19.0325	-12.2826	15.543		18.9947	70.1713	37.187	53.8823
-0.182416	46.2335	-9.33862	23.7668		128.788	132.788	-31.4251	6.96615
-5.87571	29.3983	-14.997	7.07324		8.27532	26.6244	18.3231	26.2845
6.49353	31.5366	-39.8109	4.5334		-4.75501	6.6017	-28.0937	-20.0454
4.48478	24.331	-95.923	52.9122		-4.9342	6.09146	-23.3543	-16.3543
-7.50025	13.2909	-35.8314	15.2261		-6.6116	10.9035	-31.8151	61.6578
-13.5207	25.1925	-19.1989	8.75513		-22.6823	6.88063	8.03255	-25.5123
-11.0159	21.0043	-13.1227	-4.81337		-4.93324	57.2938	-37.7379	141.127
-3.66171	19.6587	-64.1699	12.967		3.39686	11.7374	-77.5111	-62.7767
-24.3171	-13.3327	-23.868	21.7775		-20.6054	68.8271	-4.32826	40.0161
-3.8268	36.5781	-9.84553	-0.291834		7.04126	-5.00377	-2.59827	-10.1978
-14.6702	-27.901	9.51306	-5.72069		-11.0706	24.7128	-18.2844	40.3362
-14.7921	66.0177	-24.6031	23.4272		-4.77308	16.5737	-64.7238	106.011
0.219069	10.2191	-23.5213	-2.45419		-16.7009	36.7877	45.2797	62.8356
49.478	15.8855	-13.0347	8.0324		-50.4949	29.6245	-33.0569	-19.3777
-8.28866	39.7416	-16.7744	43.833		-7.53941	-2.53941	-16.858	27.4863
-3.01234	-19.7314	-45.3358	8.07706		0.937232	12.4879	-12.7669	4.78902
-23.2762	-3.25896	-8.73733	-0.775916		59.1836	8.8663	-19.3111	-13.2886
-5.50549	12.2421	-12.6144	5.95199		-0.982106	5.09754	-17.8354	-7.35025
-1.51495	21.2029	67.82	76.2515		-4.41944	6.42109	6.06929	19.9497
-2.29559	6.40938	7.7783	2.7783		-70.4154	-81.9391	61.974	126.552
-11.4358	46.1622	-9.16123	6.7753		16.125	22.1475	-3.51799	2.48201
11.9365	34.9514	-9.07522	6.84761		-7.24567	1.09483	-10.5186	0.456437
-6.72017	9.21636	1.80806	14.8081		-0.610542	-13.891	-31.0702	-4.48652
-3.21171	7.1361	-15.3698	30.8725		-3.32999	-10.5841	-10.419	1.07856
-5.52404	-16.3646	2.33028	-3.979		3.89715	32.1164	-8.4119	0.741787
-12.4708	12.9999	-16.3598	-5.87461		2.63183	-21.6246	17.3168	-56.7588
-10.7528	2.52765	-13.3884	25.1468		10.0954	-51.2637	44.3697	54.2471
-29.8068	-1.9573	-23.0864	17.3185		14.0659	9.0659	-52.5394	-1.36284
-2.33043	2.66957	6.21682	-5.78318		107.283	93.2379	-2.91198	9.73534
-10.5412	7.18126	-22.4996	-9.68441		-34.6817	77.6507	163.417	157.394
5.7968	-23.2447	-15.5149	4.67017		-2.28279	12.4307	3.75603	-12.7206
-14.5364	27.2379	-45.1802	62.2909		-55.7999	4.80747	-39.1984	-33.4497
-7.18665	10.3844	-17.8518	8.73194		8.3	-4.98044	13.7303	47.2463
-2.92275	13.8353	-49.0228	44.2376		32.4835	3.60521	-19.5533	2.49803
-21.9785	-0.832284	-22.1161	-62.521		34.9309	59.2439	2.99451	12.9945
-17.8608	21.2749	-25.2488	11.0844		21.1519	12.3719	66.5412	-13.5781
-18.2929	67.4885	-13.6952	-2.54926		-2.837	7.163	2.29145	35.9622
-6.52635	11.8655	19.1268	42.2807		13.9376	6.94749	-14.2476	-2.69695
-3.00605	7.00256	-15.424	-2.19326		-7.16639	15.6519	-5.71267	7.34479
-28.7837	32.8587	-32.2314	2.9605		-12.3899	10.7641	28.2802	72.0436
-12.3754	-5.12124	-17.6769	-2.46476		0.957884	13.4219	10.7613	-4.50793
-19.5869	20.9697	-24.0978	-4.9022		3.45824	-7.62085	-7.73013	3.26987
-6.88196	1.16633	-7.96431	0.345004		-64.9732	-72.2002	16.5283	-15.4919
-4.86553	35.0101	0.249386	12.35		25.056	123.208	-20.5533	22.3374
-34.3928	-6.50378	32.3061	3.13053		-10.6601	42.8285	20.3068	5.03757
-26.277	20.8621	0.796895	-9.21171		27.3723	54.4411	10.825	-3.68329
-3.58607	15.6816	-8.02539	15.0759		-78.9427	-59.7471	-71.6326	-61.7551
-0.378611	-28.1002	-21.8409	41.6523		-4.39592	-46.6883	7.76341	-6.56714
-16.5985	26.0951	3.04321	-5.95679		78.5795	91.829	1.94686	-7.29366
-31.9848	16.8657	-4.98876	11.7303		-79.0355	31.9207	-2.16669	2.83331
-23.4806	27.944	32.1736	25.1736		3.01867	-20.1893	-4.90466	-13.9047
9.15878	-4.72165	-13.4128	14.4367		-0.372992	25.0977	-20.9526	5.73092
-5.31874	20.0927	-17.8207	30.6235		9.49591	-1.34462	-6.97978	-1.231
-24.237	-2.08394	-15.6745	7.44666		-24.031	-16.031	1.0901	11.0901
-18.7048	54.297	-2.76106	13.1618		-3.84152	-14.8165	-26.4137	-44.1362
-11.2211	22.4497	-11.9437	8.84746		-22.6588	15.8765	-87.9825	22.9737
-13.7559	45.3699	-18.1876	70.501		-17.5658	1.79519	-7.87379	9.04318
-6.5461	37.2173	-10.2063	-3.20629		19.7689	29.9103	-24.309	-19.491
1.64582	14.7033	1.68629	-7.43318		129.487	195.711	52.8411	-13.6754
11.9904	-3.87288	-7.99185	23.6089		137.374	115.221	36.5817	47.0669
20.5112	11.7736	-7.33631	5.66369		-9.05348	3.56509	-55.2622	-66.2879
-5.79431	1.80524	7.96495	18.9649		-0.447638	9.14191	-58.3032	21.8161
-4.46655	3.87396	-64.8264	4.79747		-72.7289	-65.1293	-5.944	-0.943999
8.54483	-2.45517	-5.93733	39.9099		13.7832	3.14387	-65.7707	0.745846
-50.8974	52.5727	-8.66381	17.7978		-4.58021	7.46482	-6.09703	3.90297
-53.7354	-40.6779	4.41429	-16.6347		-68.5481	60.1239	-8.42276	-14.732
-6.04427	7.18651	-16.0684	39.1548		-67.8925	50.0569	-30.3018	-3.74093
9.37707	-25.8969	-13.2198	-25.2198		8.29234	-2.68265	-49.722	-0.985168
-15.9932	17.1122	15.5025	0.36025		18.1492	27.7388	21.97	34.0707
-3.96721	6.03279	-35.876	-6.44897		5.81119	-6.28945	-42.655	-33.655
-15.9178	9.12526	-2.20014	24.4213		-57.3722	-31.778	30.9962	-2.10924
-36.0186	27.4747	4.85727	18.1377		-26.2659	-42.2622	-2.27221	2.72779
-12.2449	28.5082	-14.7013	2.23958		3.67485	-15.5207	-6.54145	69.9364
11.3592	22.3849	-10.1815	0.303644		21.8694	9.97195	121.311	101.121
-6.27844	15.7729	-3.39691	-15.3969		-0.0469	12.0537	-8.77494	5.5556
6.45593	31.499	-19.7407	41.6184		-88.224	-34.6107	-0.750665	-11.7763
-6.89005	2.80415	-18.5856	1.55253		-9.56556	-16.4641	-11.0269	8.81923
-4.62141	16.1698	-9.54337	3.68742		-71.5365	-21.2192	-20.2513	6.37009
-10.1039	-5.05651	-7.82122	9.69389		-2.37373	5.62627	-46.7328	-13.6274
-6.67927	82.3422	-19.4447	3.67648		8.8648	-16.1782	8.89489	-7.10144
-18.7861	31.5312	15.1135	1.86391		16.9727	-27.3335	-67.5367	-76.5367
-3.81934	3.40768	-15.2702	25.192		30.6249	0.486437	-44.4629	-9.18893
2.40214	13.2427	6.96157	-5.5024		-0.663814	-10.2998	-32.4849	-17.9435
-34.9339	2.42297	-5.5211	-12.7752		-13.3836	26.492	-32.2058	49.2817
-4.80274	9.11006	2.46321	-14.2178		63.8314	45.5925	-6.40017	17.9128
-11.7616	38.5557	-6.05149	82.6372		-99.5288	-40.9586	44.3321	54.4736
-4.69453	4.54599	1.79035	17.0025		-0.00921351	-6.93365	-14.7274	51.7891
-1.43668	-6.43668	-10.1088	13.0124		3.90466	-2.11786	-16.1435	15.8767
-19.5927	24.1707	-3.14273	12.7938		-1.96753	12.5408	-75.3696	13.6519
-0.759558	-16.6961	-23.7042	4.24984		-17.2118	0.344193	-14.3291	38.3841
-7.81866	-13.8187	20.9837	54.3745		3.02682	-12.6317	-10.1824	1.3414
-10.9989	14.4718	-23.176	10.3689		2.41864	12.0992	-6.24181	6.55526
-11.3192	16.9	3.11779	-7.88221		-20.7732	81.8132	-11.2486	18.9158
-1.70101	12.2118	-3.3441	6.75075		7.22172	-7.23232	12.288	-1.97951
4.81006	-0.93872	-10.9636	28.912		-3.97877	15.7801	-8.50326	6.69585
-5.61449	-16.0997	-9.35263	3.2768		6.27377	1.27377	-7.34006	17.703
-11.0187	-1.465	-11.2613	30.513		93.1385	99.4478	-6.54456	5.00608
-5.34012	43.7471	-10.0064	-1.69705		-12.3594	21.233	-34.0772	78.5112
-10.9427	-0.942698	34.9737	-23.5965		22.7631	65.2507	-7.90408	1.09592
-3.12348	11.3848	-13.9403	3.0006		2.13661	7.13661	-5.53666	-0.536659
-10.635	8.84296	-3.92511	-17.2056		-13.9533	19.6391	12.9878	-0.691402
-0.000679543	-9.2412	10.5621	-2.49536		-13.5029	-31.586	-30.5545	-46.5136
-16.0802	2.31169	-1.90618	-11.9062		38.167	-12.8182	-7.87886	40.1514
-12.6933	-2.68471	-12.3584	5.9647		-52.8488	-41.1721	7.14428	-15.957
-14.2678	7.88526	-10.1764	6.50465		-49.4397	17.0768	-21.4426	23.0681
-10.6836	14.7871	1.47341	13.0241		-77.3164	-104	24.0695	-3.88457
-18.4122	-1.65414	-11.709	5.78128		1.40316	-5.49538	-8.75001	71.3693
-4.32363	8.3237	-12.7604	-5.83596		-28.1719	22.8133	20.1144	45.4681
-7.79465	0.545854	-0.813686	39.6485		-17.3204	-12.3204	6.49344	-5.97054
-9.48848	-4.48848	4.66057	25.7096		-2.27975	7.72025	-73.1322	-45.1781
0.815978	8.81598	-8.60689	-0.924395		-43.3464	37.7667	-1.22988	9.29464
-8.87548	-14.6243	-10.4321	35.4152		-14.8075	49.6198	-11.2318	3.96735
-17.1406	10.8134	-2.79704	-14.2946		0.794406	22.9475	4.53367	-3.80684
3.95661	12.9566	-5.7185	7.09667		-38.4169	-32.4169	-25.0045	20.8427
-0.227716	11.9316	2.09985	-8.24796		-51.9585	-43.2535	23.3104	-11.9637
-13.3953	20.4387	50.1755	60.1755		-7.4563	-0.783894	-43.0313	84.9175
-4.93265	9.6087	-1.53544	23.876		96.6957	109.927	42.6687	54.0254
-16.6389	-6.63886	-4.49807	70.5606		0.899329	5.94676	-4.30693	8.97351
0.437132	8.43713	-46.4446	-86.3202		-30.9286	-46.1978	7.00702	77.555
-11.714	27.4217	-33.8815	-15.0207		-34.2775	39.9709	-27.5163	16.9945
-18.4773	42.13	4.99212	22.4674		90.1788	97.75	1.2007	-17.1912
-0.519383	16.4215	4.54448	-20.8092		93.4228	84.1823	-14.1855	3.8976
-9.2675	64.8082	-8.50435	-0.542941		2.23192	83.5299	-34.3315	-46.9501
-19.0568	-10.7163	80.5962	66.2657		0.691925	-8.98859	19.8687	2.14624
-0.836326	7.50418	-9.48656	8.00375		3.45867	21.0146	-9.52107	-2.26693
9.10164	1.84749	12.2554	18.2554		-11.9731	12.2833	-15.4873	40.6789
-4.13757	7.90747	-6.0711	27.7628		-4.65547	12.6057	9.79768	-8.59422
-8.77684	0.376851	-5.97271	5.05294		-1.59116	5.7318	11.7992	-6.76712
-6.34469	5.75595	-41.1869	-83.5757		-7.62064	69.9822	-27.5781	-21.5555
-3.54453	17.2466	-7.71658	0.592734		91.1695	116.64	9.96089	128.185
-5.9191	3.23459	-45.2763	39.7721		-9.28168	-1.68212	-109.918	33.8345
-8.14829	18.4731	-6.65287	6.57792		70.6731	59.6731	-1.24507	-22.3913
-6.35943	0.894713	-0.624106	-8.62411		13.5354	3.18762	-12.3217	-21.3217
5.61174	-2.07075	2.50593	-9.00153		5.22111	-6.30266	-9.21063	-19.2106
-37.9513	28.5651	-10.0103	5.98601		-16.0434	86.3977	-15.3531	1.3279
-5.25478	26.3459	13.5949	23.6898		-11.6607	26.9077	-6.11588	-0.0933613
-11.626	-4.05488	-10.044	2.02844		20.0636	13.1651	-16.0666	5.77882
-7.0264	2.98221	-18.8785	25.4277		-2.51266	-15.7622	29.6607	36.0298
-12.6312	4.92479	-6.3432	35.9492		2.61521	6.61521	-8.40044	1.47705
-8.85155	12.1975	17.7463	24.356		42.0057	54.6825	-0.440269	-6.44027
-0.59457	29.944	93.4291	85.4975		88.8224	100.373	-7.38668	1.03294
-4.05774	13.4175	-24.7054	4.08801		38.8532	66.8072	-11.9859	-5.98587
6.53252	14.1037	-22.5597	11.4786		-11.3615	85.1425	-15.5895	-11.5895
-15.9674	-5.61962	-9.12962	1.71091		6.71678	-0.510237	-28.4238	113.324
-15.7476	36.9656	27.2779	12.7365		-119.896	-108.22	-28.6919	9.84336
-7.63561	-0.408585	-10.112	21.8807		11.3867	1.83297	-7.17373	-1.17373
0.895933	-6.35821	-5.60074	11.8745		61.1962	94.741	8.23902	20.8576
-12.124	9.02217	76.3423	61.3294		-23.6701	-55.6903	-53.6633	48.9231
-18.8001	5.77823	-18.6714	19.8639		6.62123	-2.49823	32.4637	0.890147
-8.92885	7.9342	82.0088	70.6521		1.71184	-22.5103	-36.5595	57.5855
-2.39372	18.6553	-0.485452	23.4193		-52.3889	-41.3889	-62.771	7.77697
-12.8925	4.85504	-14.071	-6.02268		145.112	151.421	19.3398	23.3398
7.82659	16.8266	-1.18219	-15.703		156.58	134.51	-18.1223	-34.5989
-4.2836	4.7164	-38.0301	67.883		-101.825	-82.6299	-44.256	-32.1554
-4.90584	3.02581	-28.4325	18.7065		-15.1946	78.4963	-29.2423	-40.0828
-14.8274	17.1928	-9.19007	10.1983		-19.5874	-25.3362	-3.37719	-16.054
0.287145	6.28715	18.5954	-3.79948		-97.9363	-27.0625	88.9311	66.5678
-12.5089	-21.2889	-18.1998	35.1672		-155.557	-136.285	-11.8251	4.93296
-14.2234	12.4601	-12.2379	36.4989		172.369	156.432	-4.45832	15.6798
6.6545	30.9109	96.9739	90.9739		-2.807	-12.807	-60.5486	-53.6501
12.4239	-0.205546	-14.2561	30.0501		-46.4204	-68.1057	-53.3987	-58.3987
2.91011	13.9358	5.46512	13.4651		24.6064	-1.1423	3.1875	-6.8125
-0.00622172	8.33428	-8.1479	15.6517		7.20637	-2.79363	51.4861	84.5915
-17.4781	14.5421	-23.8883	29.6003		-7.36779	66.5394	14.4706	19.4706
-2.36227	19.7908	-31.8102	-25.8102		-70.6856	-56.4181	22.2831	1.23404
-15.6087	18.0621	-12.2348	0.822643		3.27705	-9.78041	-8.82249	-33.8655
-8.6668	17.0455	-9.70224	-0.964595		2.73335	29.4168	-29.7788	31.7201
15.9664	23.2205	-24.7593	-13.7843		17.8312	49.9716	-14.7041	-4.8266
-2.38225	115.299	1.40682	-6.59318		7.50487	14.5049	15.3775	25.058
1.16051	27.7442	14.8835	46.9037		-12.9635	2.24866	2.16935	-16.138
-2.01268	3.98732	-26.305	4.70936		-0.301599	-16.2607	-6.55324	3.32425
-16.9833	9.60046	-8.69819	1.77796		-37.8226	-14.8077	-3.05899	-14.059
-0.858696	5.1413	15.4908	2.43339		15.6252	-2.09732	-12.6704	-3.42985
-7.75507	-0.155515	-16.5418	-1.27256		-160.907	-176.141	-12.7376	-0.273575
1.23005	-4.76995	-19.5994	-8.97501		-127.782	-102.069	-10.7265	18.8364
1.26714	7.26714	-13.6744	12.7872		-123.071	33.2148	24.7894	33.9431
-20.1224	5.58991	-5.69479	3.8589		-90.7251	-102.725	0.535133	53.9021
-46.1606	-30.5021	-0.570817	11.3267		4.34042	-4.39722	-16.5354	-25.5354
-13.7929	5.65754	16.3928	-2.46793		-42.8445	-26.0865	18.1539	7.07479
-3.10981	4.48975	-13.352	18.6682		16.0107	33.501	-80.8257	87.8178
4.43153	-1.31725	-13.1479	-2.80013		-27.0889	3.47597	7.93615	38.7644
-8.29437	8.40099	-14.4784	-3.49394		-72.515	-47.9367	21.2527	1.40652
-10.7399	15.8438	-3.67381	22.7878		-11.7275	67.1795	-31.4064	-42.957
-12.4624	-1.47796	-13.719	7.34814		62.5391	56.7903	19.2292	61.7168
-38.0741	34.9277	1.40807	-4.59193		-48.773	13.542	-23.4565	8.14424
-15.3318	-1.47098	-8.08368	36.4271		-8.49993	-49.0565	21.2869	28.5411
-5.75143	14.6251	-18.528	25.8163		32.3865	38.3865	-14.8647	-9.86471
-9.92247	51.5764	-11.3358	29.4173		-25.2832	59.3744	1.51947	10.2571
-5.32731	45.4236	-11.6417	62.2655		10.3954	18.327	-4.47126	1.33206
-6.51429	27.0017	-15.8318	24.5731		-5.51749	3.7361	0.140738	6.16326
29.0305	44.2296	36.1007	17.7516		-3.42134	23.9424	-26.71	6.80599
-6.74463	6.48616	-11.2871	14.1836		-21.0857	26.7332	-2.26795	7.60954
-35.0906	54.1338	-11.6663	-3.70492		-57.0746	62.4401	-7.07119	14.0932
1.37798	14.6088	-9.91014	16.7113		28.146	4.99202	-2.72042	5.241
-14.8966	6.24966	-15.7903	-4.76469		-68.9136	-88.3915	-12.1903	-18.4996
9.38489	28.8628	-15.3712	-1.39099		33.311	40.538	-0.337107	-7.00951
-8.82917	6.4401	-8.54529	25.1255		34.1762	54.2859	-21.0498	30.1267
-2.50334	7.05035	0.332323	-10.5082		-44.7291	-2.40031	-0.474638	20.5744
0.323075	9.91263	-12.3323	24.6213		-3.02732	7.97268	-15.2988	-3.22628
-24.1319	12.8217	0.835464	-7.59606		0.124592	-10.8598	13.2632	4.26315
1.10951	33.2499	-21.2617	14.1832		-9.67805	19.4725	17.1407	-7.17231
-9.65298	24.181	-17.2661	33.6752		-73.4365	-33.2172	2.5418	-18.2494
1.83289	-4.16711	7.71029	-24.4301		17.3641	-0.985045	14.2717	35.6185
-0.727297	-9.43227	-20.7188	25.9114		-19.9231	-29.9231	-7.43491	3.40562
-7.43459	17.9409	-9.94609	27.0075		-2.11239	-40.1429	-82.9625	29.8885
-3.61879	7.93186	-4.82556	0.923228		55.5457	45.0605	37.1915	-10.8388
82.0284	48.1945	-5.50423	28.1665		-25.2514	48.7194	121.154	90.3259
0.98385	15.5046	-21.8878	-10.8878		12.4643	-21.3696	-4.57452	1.17426
-29.2412	21.0761	-12.7994	-1.79943		4.50611	15.4905	-3.23378	-19.9528
6.60828	-4.0311	63.1643	86.2656		21.9575	10.9825	-6.0079	19.4035
-9.13367	10.0619	-22.8414	-9.22244		9.32753	-4.29148	-7.55857	-20.778
-7.40071	-0.400709	-8.77875	15.5343		1.92225	5.92225	-14.1646	-88.0719
9.48975	21.5348	5.2056	-4.7944		-120.716	-179.42	-29.2468	15.2639
-31.2905	2.25437	80.338	69.9902		-4.74946	83.9392	-58.1764	28.0009
-12.587	-4.2465	-8.28374	11.5624		18.8525	6.22306	1.35344	29.7112
-0.0415025	5.9585	-20.2263	-9.2513		29.0091	23.2603	1.12089	13.2215
-3.46096	12.5354	-25.6699	-14.6699		4.79629	-3.51303	-4.29893	-16.3996
-3.54889	7.95857	71.3519	59.8544		-65.0377	61.9736	-80.4327	-19.8254
9.6447	14.6447	-21.3362	56.0902		-86.2153	21.2557	5.68493	-12.8814
-11.1212	38.9747	6.15839	-5.84161		44.972	9.86009	-3.71633	4.24508
-33.9444	14.0859	134.267	129.267		-85.1423	-35.7586	80.9005	65.7014
6.55688	15.3899	-12.9757	-2.00069		22.6256	9.34513	-64.9195	-40.6064
-6.95038	6.72882	-13.015	-4.01501		-88.272	-82.272	-62.7442	-45.2689
-23.1085	9.0319	-9.64269	1.85488		26.6485	-1.20102	64.6507	54.6507
147.449	131.512	9.08395	-0.793535		-1.76098	-10.4986	-23.2274	47.6463
0.436681	10.4367	7.06113	71.1015		-54.1538	45.0694	11.5566	24.128
-5.57391	43.0939	-17.1903	0.532183		31.8122	23.1072	-31.8169	35.6781
-10.6013	3.31152	22.9059	-16.9697		17.6308	1.63444	-9.56941	-4.56941
-67.1723	-49.697	-8.6221	0.157892		4.68065	-1.31935	-40.72	62.1056
-4.70889	6.84176	-8.84872	8.66639		-98.8478	-88.2084	55.2452	88.3507
1.4453	15.3061	-12.6609	-1.66091		38.5786	45.8328	-16.0955	0.599862
-113.339	-27.9712	-5.58789	18.6685		12.0731	73.7155	-6.58987	1.37155
-8.14804	25.5227	-15.4762	9.56684		6.43271	17.4584	-55.0048	21.473
-7.21405	39.3076	19.5061	15.5061		-33.1731	0.217662	-65.0347	56.7396
-13.5638	14.2857	-11.5369	-4.30992		-56.165	21.4379	-9.49943	0.500567
-0.189081	4.1634	-9.88748	-1.57816		38.0705	89.8056	-48.5887	25.4869
-1.77848	11.4409	-16.042	14.7862		-17.0677	88.7544	-8.99724	2.00276
-11.7603	68.0065	-11.6797	2.23306		36.3961	-25.0157	-0.318919	-11.6756
4.2294	-12.3892	-18.1592	2.98706		-108.186	-97.1859	14.9753	28.8361
-6.84868	30.1049	-8.56437	0.589321		-52.9446	0.222816	-51.7211	42.8585
-5.76999	-19.6308	162.219	157.867		8.23886	-10.3538	-20.549	-4.58988
-11.9428	9.12437	-8.82287	12.4258		34.3949	74.0951	9.34149	18.0791
-0.266535	10.7335	-5.92765	6.86942		2.12569	24.8436	-5.81959	4.80476
1.28984	15.2898	-30.9531	17.0772		-41.0078	44.3599	-13.4179	1.85134
-12.1217	32.1845	-9.73063	-2.47649		1.85372	9.78537	-84.6699	21.2432
0.998774	7.30806	1.55997	-9.46569		29.5258	1.67623	8.5742	-1.4344
-5.19584	1.11344	-16.2056	-2.92511		29.6396	1.7901	-19.0612	-10.0612
-12.9598	27.4104	-12.6123	40.7547		-2.79624	32.3459	-6.59953	4.40047
-1.10248	32.0029	-107.711	-88.4886		-1.83132	-33.293	-24.3283	-29.3283
0.0860652	8.04748	-12.807	8.26018		-3.75132	-47.3222	-3.79172	7.20828
-36.8125	14.3641	-21.484	-32.3246		-108.952	-95.1551	2.88168	14.3793
-5.67121	-14.8693	-7.54164	3.48402		33.2014	177.157	-3.09692	43.4248
-17.3853	3.40585	-11.4025	32.3609		-68.3788	34.2076	1.96767	9.22182
-17.4842	15.9065	-25.8968	-16.8968		-106.767	-117.607	3.54561	-11.4673
-3.94086	-16.5122	-18.7699	18.0977		-107.179	-118.154	-7.66834	1.03663
7.30456	-0.695443	-17.704	63.409		-5.25558	-0.255581	-7.16618	5.89128
4.83571	16.8357	-10.7984	9.48452		-42.6374	38.6605	-39.5313	-0.908226
23.9872	-2.24829	-15.9286	28.4786		-10.2324	9.21798	37.4056	72.6796
-35.4267	24.056	-28.5491	20.8345		-137.593	-144.492	-6.59443	71.0084
-1.66574	10.3343	-23.6069	10.2271		-1.76422	12.2358	-72.1254	46.0991
-4.63447	10.3655	-18.2682	10.9488		-5.36576	17.7882	11.9664	-0.134201
-0.810176	24.1227	95.7716	84.7716		-49.5912	3.82168	-7.29103	-0.300912
-2.80847	13.1281	-80.7892	-71.3606		-4.43735	17.9259	-19.0226	7.66089
-6.03636	3.65785	-1.49321	38.969		-12.2333	-23.2589	-23.1468	-17.398
22.3918	15.1648	-22.8832	33.073		2.97184	9.97184	-10.9845	35.6457
8.87441	1.30327	10.3934	29.2542		-9.96603	1.0184	-3.83628	24.0133
-7.84356	19.1311	-11.9269	-5.02836		3.3442	-7.28016	-33.5228	33.8766
-1.31844	10.7822	-8.87607	17.8074		-6.40444	13.7337	-126.244	22.2528
2.7005	-2.2995	23.0737	1.69671		-13.7524	16.672	-15.2052	25.2569
-4.59492	4.52455	113.316	129.935		-0.441592	-18.8335	-22.3252	10.7803
-0.155537	8.18497	-9.38671	-1.70422		16.6336	27.7639	-40.1015	48.92
0.935909	8.19005	-44.8572	-30.9768		-28.7956	-36.0497	-25.285	28.082
-10.5467	21.0268	98.1737	104.174		-82.978	105.269	-31.7459	-41.7545
-1.99546	7.24505	-2.24187	-7.24187		-21.3887	96.8358	-25.5336	-16.2931
94.5776	107.748	-17.6474	37.5757		-5.12717	46.0494	21.549	68.0048
-50.7448	-6.98136	47.6725	61.5529		-20.547	9.99155	-15.9627	17.7081
0.750182	13.3975	-9.0269	4.77019		-6.45878	-28.6119	0.241018	-10.7434
9.51985	-2.00393	29.9509	-8.67224		7.67055	0.772013	-5.76982	-0.769815
-7.50085	14.5694	101.169	90.1695		-123.122	-115.523	-21.5097	-14.2827
5.2706	18.0089	5.88359	15.8836		3.92111	8.92111	38.3889	44.3889
-0.391772	10.6082	3.9146	19.1484		16.8782	70.4916	-59.8286	-23.6553
-18.8718	29.1585	-1.0733	8.80418		-9.06122	7.6968	5.49412	17.5666
-10.6818	6.87415	31.8328	20.8071		-2.92249	8.62816	-152.234	-174.387
-10.316	5.11988	-3.80273	14.5892		-39.7431	-29.3953	29.4978	0.280861
-5.46148	8.3993	77.3791	90.3791		-66.4565	105.067	43.0271	51.7647
-30.3101	40.3987	80.12	112.186		-134.131	-145.156	39.0772	45.0772
-12.7294	6.53825	-5.65575	-0.655751		-16.8896	140.879	61.1175	150.55
3.40506	28.7805	-2.05293	7.82456		-63.0423	-44.6504	44.5338	69.9453
-0.720058	5.58923	51.3055	44.0514		-118.245	-125.816	-0.47781	-6.78709
-3.8775	7.10693	23.9157	12.4181		139.887	131.149	-4.22929	4.08003
2.91078	12.1088	157.65	169.007		-6.16601	5.33156	-10.1322	6.80873
-11.8458	15.1289	-14.9471	66.166		-108.828	-62.3721	-6.75247	-1.75247
6.85285	-4.14715	4.79048	-17.2798		15.5232	3.42258	4.50726	-8.11131
-7.47879	4.07186	2.58891	11.7426		-134.977	-153.369	-0.0420616	13.8068
-11.4495	2.5505	-3.15546	3.83466		-66.6526	27.0383	-4.04542	-26.1985
-57.2944	-46.3099	0.208512	-19.8087		-39.7376	-48.4753	-8.66768	1.85684
-5.61178	9.6004	32.8444	24.7961		-45.4306	78.4232	103.258	73.6532
-5.07469	13.2744	-20.8249	2.29626		0.215608	35.3577	31.3347	39.2961
-5.06954	8.2109	75.41	82.3085		4.3294	-2.66071	24.3722	35.3979
-5.80619	0.21633	-6.67861	-0.30948		-28.4455	-35.6997	26.3889	36.3889
-8.47503	11.6346	-19.1987	29.5381		-35.8348	-31.8348	38.7937	27.437
6.72294	16.7315	-2.9597	30.5563		-20.1527	58.369	-14.807	-1.52654
-21.2523	36.6003	-20.4044	46.9371		-53.355	-21.2146	-3.03122	11.9817
-7.14715	4.85285	-23.7091	6.85568		2.50718	-3.24161	18.4188	2.5555
-13.8571	-20.4668	-15.0252	5.08446		10.8248	0.824763	-1.91171	3.62784
2.70256	15.76	15.8521	0.709782		-6.63416	0.688793	-2.89363	2.64591
-5.40493	7.2424	-13.886	0.0267834		-5.94622	10.7728	143.416	149.439
8.25173	-3.74827	0.305414	-10.6946		-29.4831	-73.8274	-20.4723	-4.51318
54.7026	61.9567	6.68631	0.663789		-8.52911	127.084	-60.8414	-48.7408
1.55649	10.676	-21.125	40.0047		55.0826	18.2988	63.7762	55.4357
-4.02287	7.52777	-4.31812	1.68188		-16.2024	48.1336	-17.9085	-4.67775
-1.1684	-15.6892	-20.3441	13.3266		-58.9053	22.5823	-2.10269	3.6461
-3.20407	6.95173	-5.81634	-19.0471		21.2308	10.2052	-7.70995	-2.70995
-140.167	-151.142	-26.6438	26.9696		-29.0585	15.4522	-0.885378	10.6384
-1.10098	27.5657	-24.0634	43.2781		4.92785	1.31434	-16.4653	-29.7458
-2.03768	7.96232	-1.71202	12.2008		-12.1873	136.995	-23.7403	-18.7403
-1.29744	7.40753	46.2651	-7.22348		-43.6215	23.7779	2.74957	10.711
7.74706	30.8682	-0.192786	-9.44637		-84.7307	-55.5137	-28.5657	48.5712
-7.27353	10.2168	-22.2858	15.0711		-39.9994	18.6212	-97.3571	-111.811
10.2805	30.5634	-10.3442	8.0477		-0.114429	5.90809	92.0284	78.809
-1.74827	4.25173	-27.4906	16.8538		29.7538	79.0676	-8.91175	-1.65761
-5.23466	17.8865	26.3298	0.918369		-108.104	-87.9664	-65.9948	62.6773
-143.971	-158.617	-6.18909	-0.16657		-38.0442	-19.721	17.8214	-0.52767
-3.77725	10.0716	-5.75154	10.9675		-108.151	-113.9	-12.7425	-4.00485
-2.79343	4.4336	-12.1185	-0.567817		-112.23	36.9527	-60.027	-13.6111
0.105904	12.7532	-26.114	-6.91841		6.02372	-0.900717	15.0792	4.07922
-2.97147	4.02853	45.4946	30.2608		-9.99645	-17.2506	-44.6892	-53.8086
-0.573324	8.42668	-34.8722	-51.6302		-57.2234	-16.8185	-72.1941	-59.1941
4.03064	71.5256	-5.12311	1.80133		36.4353	17.2397	-91.2095	-80.7244
49.6581	42.0869	-17.8856	-4.47917		-6.82087	7.09192	-12.1726	18.507
-3.00332	7.00528	-21.0719	4.39877		3.22407	-5.92962	-104.866	-95.8664
-31.7919	45.345	-16.8014	11.0481		11.3621	-3.90713	81.6193	74.6193
-10.9813	-3.98126	-22.8032	-8.22798		1.77249	60.6131	16.3579	22.3579
-52.884	-40.2367	52.1322	62.0097		-77.5204	-81.5204	-6.01246	9.92407
-4.30922	8.94032	38.4397	20.1166		-144.668	-148.668	-13.9038	-29.8403
8.78007	-2.21993	28.1107	18.1107		6.1744	-3.70309	-3.76908	2.23092
5.7397	18.9892	-8.63518	-21.8546		-17.7584	100.466	-13.9937	8.26675
-13.2281	15.9475	19.3641	5.5152		4.16639	26.2367	-58.9371	-68.0907
-0.862949	14.502	73.2378	38.1258		-63.3457	-48.825	-6.92102	14.0493
-14.721	-8.72103	-25.5368	-1.2238		0.617062	6.63958	-32.2171	-24.2557
-0.993429	8.59612	-15.2084	-0.687666		13.8979	-2.86012	-75.7832	-69.7832
0.189966	7.41699	-27.2311	15.4625		-175.008	-168.985	-64.3975	-79.3443
1.27962	17.0074	-20.1022	5.64642		8.0276	13.0276	-96.5351	-82.738
-9.03208	8.45824	-34.5123	2.30317		18.3862	31.0631	-64.0876	-51.2725
-10.8218	4.17821	-16.1918	-5.20741		-0.134477	98.0176	-27.3779	-20.4793
-39.5207	0.884227	-11.1004	29.8987		2.19026	-5.77115	-11.3901	25.9668
6.80564	-2.19436	1.34704	-7.77242		-11.2669	14.2038	-31.5461	-24.319
24.4724	4.71355	-11.6345	-5.88576		-27.9636	61.1345	-88.7406	-99.38
31.9467	4.12114	-7.59051	2.50435		-15.3535	-4.35353	-109.09	-96.9896
21.1444	6.87692	-8.04727	4.62955		-77.6203	45.9454	0.319345	7.24378
-28.4856	-0.636111	-6.97331	10.517		-33.6845	78.7446	-22.5935	79.3769
-0.997385	8.15631	-20.5239	-4.58739		-11.6566	20.3636	68.6196	58.4638
-153.177	-118.648	-46.12	12.5006		-22.3068	24.3233	-37.4088	-25.9113
-9.70882	-36.2697	-33.3131	59.5985		-77.6939	-42.4199	83.4846	73.8041
-15.2791	55.2689	-8.1663	-1.24187		-165.654	-176.139	-8.37127	3.72937
35.8343	-1.0333	-1.54767	9.45233		-83.412	-96.0593	-34.9192	113.022
0.329912	23.1482	-10.5735	-4.57348		5.43785	13.7783	41.5865	55.4354
1.3105	20.5061	-10.7395	13.5169		43.0502	12.3707	22.6884	43.7556
-0.888765	10.1112	-7.91522	8.02131		-40.9656	-14.3819	159.447	164.447
-4.44306	9.60171	-10.702	50.7099		5.68793	21.6879	29.689	17.6165
-14.5802	34.1566	-22.1936	18.7476		16.7514	-17.2387	-9.44299	17.1407
-10.8349	4.43437	-28.2084	6.93377		21.6514	0.505196	-1.61679	-14.8972
-4.88877	9.11123	-19.1233	37.0557		-98.4585	-90.8589	10.0474	22.148
-21.8118	13.8471	-17.7197	15.8727		-45.4013	-54.139	83.4635	71.4635
2.34712	-2.65288	-20.0792	13.0262		-6.118	3.8906	-58.3366	-76.6858
7.91624	-3.05875	-7.42342	63.1246		-49.8911	-114.172	70.3134	84.1742
-4.14373	22.4777	24.3028	13.3028		-31.0056	-66.1176	-66.1981	-36.9063
35.3146	105.863	-8.87998	11.2581		-35.3407	-26.2213	1.09877	-9.90123
6.12007	21.3538	-7.30197	20.6521		17.3648	30.0416	-34.2357	-41.8352
55.4387	42.1891	-10.0822	45.8259		-22.1305	85.5912	-12.12	-1.63482
6.01252	20.5539	-7.57655	6.94422		-9.97025	-19.8477	-0.889456	-18.3798
-11.1312	35.3246	106.663	95.6626		39.6563	48.81	16.92	-4.22621
10.9732	4.07464	-5.48719	-12.7142		-27.8886	-7.77902	-64.3086	24.7895
25.6442	17.5959	163.059	151.913		9.71934	39.0044	6.36005	15.5137
2.73466	31.5281	6.23597	-0.764033		-7.11119	16.0968	-28.8815	-19.3278
2.42446	10.856	-5.19941	4.80059		5.41756	-7.86288	-64.1073	-28.9652
-8.67525	0.324753	-66.6099	31.3138		53.4684	77.6696	-52.355	-60.4033
1.81973	24.921	2.91882	-9.12622		27.447	21.6982	-22.8315	-10.759
12.9462	19.9462	-8.16938	0.53559		-1.68117	76.1026	-66.8082	-43.6002
0.314713	12.3597	-0.313922	-6.31392		18.5334	126.255	-3.18546	-17.516
-10.0074	9.47052	84.127	64.3682		-97.7996	-105.761	-15.0132	0.198961
-139.228	-128.243	-2.07872	11.9213		11.7844	-5.77161	56.5098	117.922
-9.44669	20.158	144.093	126.37		4.79782	-6.72596	-36.6247	16.9886
3.21006	-15.1818	-27.9898	2.6897		-23.7674	-29.79	9.27581	-22.8646
-4.80439	3.19561	-44.3	-16.2105		-15.7266	45.9157	-1.66785	13.5443
-2.37603	30.1151	-5.50615	5.49385		-20.7028	28.1477	-28.8596	-14.3388
-1.83767	11.9594	-97.2805	-86.2548		-66.6478	-78.8805	-10.1432	9.30719
7.96155	21.2111	-99.1879	-18.0748		-133.915	31.5996	-85.1155	-61.9943
-11.068	5.4086	-10.2639	-3.33945		-2.98577	8.03989	-102.753	-93.6335
3.12667	17.7019	-23.7863	22.8439		-1.10563	-8.35977	-104.016	-98.0161
-7.0942	2.49535	-4.37246	4.8256		3.08591	40.0395	-23.2405	44.1589
-15.2552	55.4536	-12.7713	-4.33982		12.1079	1.63171	-24.327	1.14373
13.0677	-2.0746	17.0828	-13.9315		-30.0138	-59.5767	118.599	146.448
15.2264	-4.79079	-17.2506	-3.3702		53.5906	18.3166	-15.7893	12.0603
-1.71775	7.43594	-0.749333	-5.74933		-80.6204	27.1013	4.12486	111.444
5.58652	-5.38847	-87.5591	17.8879		54.8021	-12.8503	-14.9938	75.4147
8.66878	21.6688	-9.49308	4.38735		-27.3982	4.06349	-64.5726	31.5067
-0.89232	21.178	23.0042	59.8196		6.78418	-0.114366	72.6795	61.6004
6.99603	13.0757	-5.1523	-18.1523		8.82874	1.83862	-92.1592	-71.092
7.01782	-9.60082	88.9311	69.4531		-137.492	-130.265	-33.7934	-22.7934
-25.1816	72.742	-8.74463	5.76365		-44.0131	-36.6901	169.579	154.346
-14.7405	4.73741	156.632	139.156		8.98003	-21.5848	23.2256	32.0586
9.8881	-4.62019	167.813	152.614		29.494	52.7019	-14.6611	-26.3378
-1.21734	9.78266	-3.97112	3.9903		-21.0987	-8.99806	-72.9666	-63.9666
-0.222425	33.1683	18.896	12.896		145.316	139.567	-9.39314	-2.4946
-21.8366	10.1836	-23.4576	11.6845		-139.074	-147.035	-1.84454	26.005
-5.81049	11.7455	-17.4178	63.6953		-136.288	-126.279	-21.0016	-32.0016
14.9783	3.97828	-2.87342	2.87536		-0.103276	-16.8613	-24.9881	-18.9656
19.6785	-10.9296	-14.0757	-1.50429		1.52643	16.1017	114.945	105.826
16.7985	5.44181	-0.637211	4.36279		-38.1347	91.6165	81.2979	155.546
-4.48026	8.3349	20.6411	12.3006		-138.794	-101.84	5.75191	-7.24809
-9.97409	6.78392	-9.41202	7.28333		-35.6339	10.8878	48.6127	146.398
-3.73488	24.2192	-3.45933	9.54067		53.6794	100.31	-32.8285	-21.8535
-7.46867	27.6735	-36.7352	98.686		-44.9584	-11.4135	-6.58968	-27.7541
1.87796	18.636	-49.3058	68.9186		59.6774	85.0529	-3.79224	42.6636
-34.5964	-14.8376	-9.3095	3.94004		-84.3194	-65.9275	-30.2735	14.1337
1.63009	16.1509	-10.5883	-0.240475		-7.95635	2.05225	-75.5437	-11.2077
-8.06976	5.84304	6.41754	40.0883		83.3601	112.536	-49.7687	24.3069
-12.0032	20.4879	-10.4264	37.6039		-40.1162	37.3768	-35.7375	5.26164
-65.2647	2.0768	-10.7782	1.84033		-12.7625	3.17399	44.8797	38.8572
-124.484	-32.3661	-42.9862	50.4866		-68.5855	-59.466	12.1611	-5.3949
3.70409	9.72661	12.4409	22.4409		-116.984	-125.689	-36.4079	35.1381
-7.45985	14.6933	58.2836	65.5107		3.44136	-6.19467	-47.362	-27.5158
-0.988803	8.56489	-29.0309	-2.818		-7.51437	43.4708	95.5811	118.702
10.6214	-2.62811	-33.8297	-20.8297		-81.4359	-113.456	-81.2771	-16.2949
-13.5189	35.218	-62.4243	39.5461		2.68488	-4.21366	-30.4917	-21.7541
-5.09645	32.9667	-8.45156	8.31029		-20.1849	-11.48	-0.76676	-9.88623
-1.28868	31.0075	-10.0194	12.3438		-16.3343	-35.4417	3.75892	-5.24108
-0.387814	9.61219	10.0079	30.0251		-16.6186	-43.3021	-2.68985	4.23458
-146.797	-138.457	-21.5426	118.348		6.65317	-2.60042	-40.4558	2.0319
3.11568	12.6694	1.22448	-19.4752		13.8589	135.633	13.7173	-39.6956
-16.2676	5.78369	1.91104	-6.02061		-5.43611	-21.4324	-92.5193	-83.7817
-6.54313	24.065	16.0891	2.20869		-33.642	-24.0524	0.409521	13.2247
-0.405789	11.6949	26.3992	17.9676		-41.9514	-56.4596	3.37637	-6.17732
6.52681	-31.3689	75.6631	82.9173		-40.0643	27.5881	-14.4862	1.51009
-4.0502	13.5058	24.4711	43.6939		9.28286	-11.0287	-64.1486	82.4029
1.41321	25.6696	-8.22956	2.77044		1.14189	-14.1274	-74.1819	-85.1663
-7.73488	20.2192	-11.0395	-2.99125		-3.87228	40.6385	96.1171	88.8901
-32.8282	52.1472	169.494	154.058		13.4302	27.2273	-12.8416	1.01919
-22.2032	-38.2032	-21.3116	-8.66429		4.22556	41.041	-31.0731	-41.2289
-3.55155	9.79325	-52.5754	-20.0842		-13.7644	11.7063	-16.2999	27.2709
-0.0954469	14.8514	-11.7933	-4.11085		-42.9456	-51.6506	10.2786	25.7145
-0.675665	10.3243	12.9444	18.967		-1.25322	-21.3628	-108.57	-27.0829
-4.91381	33.6215	-12.7056	-18.7056		21.0732	-0.303818	4.09378	-11.0485
5.68475	-4.31525	-30.8557	7.03995		10.0762	0.440169	-64.2669	-71.5211
-4.07589	28.5286	20.8577	10.8577		-26.0613	-55.2369	1.31492	-10.7857
-6.22752	-19.2275	-65.3697	47.2187		-6.76313	3.24547	-25.1639	17.3238
-6.90557	14.8756	55.3626	35.3454		35.2406	153.023	21.3798	38.1378
-6.54313	24.065	133.505	145.003		-33.6197	1.52238	-112.318	-137.788
16.0182	2.73778	101.488	94.2341		8.63823	30.7913	-3.78782	-14.7878
-60.5554	-15.5589	14.7598	108.233		33.6225	-3.33116	-21.7602	49.1135
-5.34114	25.1974	-35.1113	-3.53771		10.207	-2.60812	-46.6371	15.0583
16.9719	3.80189	22.3576	-31.2558		12.1811	-3.18392	-19.0726	1.9764
41.899	12.4719	-27.7837	-16.26		54.4326	162.154	-58.6919	-23.5498
-5.50063	5.49937	-6.99797	6.22144		22.409	7.88826	-117.064	-124.291
-6.54313	7.36966	2.93148	-30.4592		-23.967	40.3137	-9.59346	15.8772
1.17407	14.1741	-9.23166	22.9087		-44.4483	-21.2404	-64.9792	-50.4709
-6.45301	7.40776	-15.9142	11.5705		-9.88889	27.0647	-7.18754	24.9528
-142.024	-126.101	0.492752	7.41718		-31.4491	-38.6761	-14.159	-5.42139
-11.3362	-0.310497	-13.5421	13.0188		-22.8359	23.7942	-8.93674	-0.199094
-22.0969	45.5555	125.286	101.381		0.671331	29.4647	-56.1986	5.44372
-11.9926	12.5858	-29.7302	-23.7302		-3.2475	19.9064	-69.1728	-73.7326
-20.1759	-1.77983	-13.9543	1.27943		13.9578	6.70363	-0.933724	7.06628
-0.42229	10.5777	-40.8757	23.7018		-25.9175	-38.5361	-38.4626	55.2283
6.77368	-5.22632	109.345	123.142		-11.5159	-1.87988	-7.10813	13.0015
-3.24094	7.8893	-5.66383	3.11616		152.626	163.651	-64.5614	-70.5839
-13.8993	-26.8993	-8.87884	31.5833		-3.33244	18.8207	-78.3833	-91.0601
-3.92886	11.0711	-18.5225	35.676		-43.6897	74.0927	-139.761	41.6338
-12.1707	8.79964	71.5418	49.7794		1.91076	12.9108	54.2864	63.2864
44.3389	64.185	-59.8661	-0.383363		-7.80538	12.3042	-36.3032	28.8869
-3.45573	9.54427	-7.31418	29.019		-14.1211	-8.04147	16.9351	30.2155
0.688627	20.5348	41.678	53.2018		6.2448	62.411	-20.9973	-6.95255
11.6903	0.715328	150.418	163.637		30.8532	44.084	-49.2177	-57.5582
6.24519	44.3084	-11.4419	-4.44185		-11.717	11.4042	-66.4656	-56.4656
4.93255	-6.04244	25.2199	13.2199		-1.5263	-19.9182	12.7143	5.11474
-0.254647	19.9351	0.339069	11.485		-74.97	-82.6525	-48.2647	7.9015
-28.8284	-41.8859	-66.2699	61.3028		10.4411	18.7816	35.3276	-23.513
-19.0148	-10.0148	3.75166	-5.48886		79.8451	128.696	-11.2847	137.898
-1.85123	40.5376	-7.44373	45.2695		19.467	26.7211	-6.5097	-0.760915
-4.99905	4.199	56.4173	82.6302		9.41376	-1.11076	88.9285	147.769
3.95902	-2.0635	-24.1881	-8.4739		0.820042	25.133	-6.77849	1.95915
-2.66082	14.8951	-1.73003	17.1978		10.4679	-4.47894	-1.4401	-13.5407
-12.1798	19.8404	-21.2264	1.87494		-12.9724	4.58358	-11.1557	12.0722
-7.8484	12.1688	-13.5897	78.449		-57.6841	-45.0368	-58.5682	-30.6141
1.46267	7.46267	24.5325	39.0408		-155.917	-169.83	17.7306	6.17993
-9.00626	-2.00626	-30.1048	57.7506		-6.85895	-57.8442	-118.571	-107.021
173.312	163.312	7.80747	27.1685		9.58374	3.56123	-5.96009	0.0624327
13.4353	-0.18372	-12.2838	20.8216		-8.99629	3.68053	-22.9695	-35.0701
-21.009	30.0485	4.767	98.2399		16.4559	1.88059	-89.9978	-68.9306
7.3129	17.4687	29.8245	22.8245		-5.46759	11.2514	-23.402	51.5507
6.13546	17.1611	-2.46693	-30.2925		-51.2144	91.1874	1.33706	-3.66294
1.99048	12.9749	-13.6492	6.19698		-55.4275	33.6706	17.7923	45.7463
4.67042	-8.38704	-6.4945	0.40404		-26.47	12.2432	-8.32868	1.67132
-1.83812	38.6241	-6.98402	19.5769		1.86402	12.0198	50.3427	42.7431
-3.1265	11.8864	-2.00455	10.5668		12.9666	23.951	-4.67177	7.56093
-2.44424	21.017	-16.1043	16.2375		18.5675	12.545	-39.9677	53.7232
-2.78241	13.1404	-13.0942	-1.09417		-55.791	-20.517	-12.1826	-0.631991
-2.82038	9.85644	-12.5168	-1.51683		-9.13428	52.5081	-85.8373	-93.0914
-6.34909	6.26948	-19.7179	-8.73347		-18.3008	-2.36423	-84.8528	-93.1933
-10.4081	2.82268	51.0423	40.6945		13.9182	43.2033	6.40893	-12.8587
-3.6863	5.90325	152.866	166.747		6.38909	20.9644	12.7602	111.843
-18.1045	28.3113	-5.95142	1.2756		11.4136	-22.1313	19.6939	28.0033
-5.42606	17.5889	-1.63068	-7.63068		-9.05834	84.4145	-20.8195	-7.53904
-3.17109	7.82891	94.5514	102.551		15.7268	3.82933	-3.3463	-9.65558
8.31423	19.2987	-67.7269	30.9008		32.8557	40.1098	45.7155	74.866
-6.1649	40.7575	-33.2011	193.015		-8.63603	-20.1867	-18.3933	67.7841
-12.1505	-19.075	0.743196	26.1187		1.68288	8.93703	-10.5105	7.88142
-9.73565	19.5495	-0.0134739	-11.0135		-5.1655	31.7881	-109.06	-104.06
-5.152	11.606	-14.9978	13.2614		17.8112	42.0677	-120.41	-109.426
-12.3711	4.34788	-41.1112	-33.1112		-32.5973	-11.4511	0.0471614	-6.26212
-6.52981	3.16439	0.859543	-18.0683		-4.40959	8.26724	-14.2673	-0.860895
168.9	174.9	-15.6575	18.9944		29.1962	118.629	-2.89728	6.25641
8.55522	-6.64389	-4.53829	2.36026		18.2019	9.04817	-37.6409	-25.6409
9.15824	-1.18957	7.82002	18.3445		-6.97492	26.6958	-14.1343	4.45835
-0.802219	9.19778	78.9513	132.318		107.308	100.081	-58.9532	53.4758
10.3605	3.10633	4.51525	-8.10331		3.7186	-3.85254	-59.8483	-68.1888
2.62389	-3.12489	-7.58437	3.44128		-24.7013	39.5794	-57.991	-63.991
-5.06405	7.55451	-3.67283	8.89856		7.58526	-8.41107	9.00773	82.0095
-9.53279	29.6029	-9.5105	21.169		-70.0828	-83.762	-53.0877	-22.0734
-2.36025	10.6972	-1.51508	-10.5151		-7.56759	14.5855	-37.8784	-0.574302
8.73597	-0.00167432	-20.1154	53.9603		55.2737	126.147	-10.9157	2.94508
-2.43133	15.9606	-21.1994	24.4461		-12.2087	-0.71113	-7.03547	-39.1758
-17.4562	50.0387	-3.1619	5.6711		22.0198	34.6966	25.0546	46.2008
-0.366747	12.2806	-7.94615	3.03828		-11.0648	22.4801	-62.7733	2.41674
-6.31244	7.68756	-8.9185	17.765		-13.109	-5.85488	-17.0585	4.08769
-14.2138	50.7684	43.1661	-21.1699		15.4287	3.90493	8.07511	-14.078
-6.37423	14.8745	42.0629	68.7464		-36.1559	-30.1334	-7.10328	-12.1033
-7.07288	-66.1987	10.3147	4.29223		-89.1949	59.4297	-36.263	-31.263
19.2149	11.9879	-5.82911	4.32669		14.8571	23.1976	-35.6482	1.30546
-8.83708	12.2301	-13.0987	15.6947		-19.3483	-38.5439	-30.3123	47.4715
-9.65275	14.5694	110.306	161.248		-12.3738	29.955	-9.66267	11.4045
-0.104798	16.6142	-19.7193	31.3382		0.986219	11.9706	-10.537	-1.29647
-2.36061	12.6394	-8.10756	10.2843		-41.1616	-17.9537	-10.7546	-0.877146
-4.0887	63.4063	4.11731	11.7998		88.1209	120.141	-34.0497	10.2946
-20.2142	6.4693	18.312	-37.7235		-12.4393	-4.00774	-54.185	194.087
1.09407	12.6015	36.4355	134.221		-7.75665	25.9141	-10.2459	-3.87672
-9.74178	22.2509	4.87074	31.8454		-26.2741	-10.2778	-20.6673	103.186
-32.173	-20.1006	-55.9049	54.9559		0.541293	-9.45871	-22.221	4.46247
-0.720602	9.2794	-16.8212	38.4019		-31.8958	-16.6265	8.17167	24.168
3.69904	-6.30096	0.976058	12.4736		-19.4588	33.9541	-12.5042	14.1793
-6.50312	21.3464	45.3402	80.022		-26.645	-6.50684	-24.558	-29.558
15.9677	0.825395	142.912	117.536		-0.449962	12.1686	3.44729	-7.53714
2.71274	23.859	-42.174	-25.2331		-2.97582	4.27833	-5.32428	12.2317
5.27899	-0.743525	-7.85134	48.0568		-13.3599	80.331	-29.8311	3.83969
-9.54183	5.60045	-13.5349	13.0866		-12.5421	-3.54206	-9.23933	11.9251
-11.1785	18.4262	-17.1114	1.83274		-113.198	-120.123	0.965389	-17.9787
-8.86294	8.62738	-31.016	-8.19775		-1.08558	32.5852	-7.32388	63.5498
-0.236235	8.59676	-17.7422	2.56944		-1.52159	60.1207	-96.5927	28.4359
3.688	10.915	-7.78889	32.0524		-21.9639	-15.9414	-24.1622	-9.58693
-19.1816	8.644	5.74737	14.4523		7.36206	2.36206	-44.1262	26.7476
-2.10174	10.5456	-5.62098	32.2747		-21.3975	-13.7979	-114.496	-102.423
-12.7675	49.5476	-77.8137	36.2688		-35.0255	-23.9999	-10.993	82.3476
31.6817	-12.7255	19.8218	-5.55368		-8.24917	16.0638	-6.92571	-1.17692
-21.2636	-9.21855	-14.3876	-5.13396		33.6282	42.7477	-4.68793	27.6539
-1.41874	11.8617	-13.3598	2.63651		15.0014	22.2555	-8.29561	-22.0927
1.3971	24.605	-16.8496	-2.32884		-9.50251	1.99506	-56.9537	66.612
1.29728	15.2101	0.573816	60.9145		7.38186	-5.84892	-42.162	39.0209
-5.57495	-0.574953	25.7633	2.74835		-9.01022	-24.9467	42.2267	29.0073
178.636	158.353	-3.75925	28.3063		-30.9077	13.6031	-5.40912	3.32853
-2.34771	10.9971	-5.79505	10.1415		-25.986	-18.0543	27.6354	45.1914
-0.976529	19.0407	1.49948	-7.61999		-13.9177	15.2579	-5.4146	0.585396
-1.71794	12.1428	-22.5039	-30.1035		-53.6562	13.8388	-2.59742	-13.6231
-7.01733	26.4987	131.573	141.45		-62.9601	107.922	-7.1056	2.77189
-7.65484	6.02436	-23.8745	24.1145		-5.02036	7.08028	17.961	-11.3241
-0.991805	8.16189	-5.04846	8.95154		-48.8355	-32.8392	-14.2842	-20.5935
-60.1431	-86.7268	4.1209	-7.95158		15.7475	28.4243	17.2556	45.9223
-102.27	-79.1163	4.10446	-16.0337		-16.8418	18.8172	-5.41187	4.58813
2.40326	11.957	-46.3032	2.32281		-11.3489	-3.0084	-1.4913	52.1221
-6.75455	7.82071	3.18053	-5.81947		-3.24379	39.2439	12.7735	-3.22284
0.345953	8.2776	-1.84836	4.15164		7.87503	-23.0955	-4.89416	6.13149
-17.9065	-25.8679	-2.99593	37.4663		-15.6771	5.46908	0.463406	25.9341
-3.05234	29.088	-4.9395	6.58427		-6.53052	122.736	-13.1265	0.123065
-6.20633	25.934	-19.936	8.01807		-33.7114	36.8973	44.2473	-4.48955
-8.85014	27.483	-8.15777	21.4469		13.0849	-7.02472	-79.6125	-74.6125
-2.10049	11.1799	55.3474	40.806		-5.89517	6.78165	32.0313	39.9927
-10.2884	19.876	22.1306	6.93153		-0.0519991	-11.0777	-11.4023	-0.76292
-1.74046	7.50006	-4.11861	0.881394		2.09353	-7.02594	14.996	-18.838
-13.7437	9.46429	-11.615	-4.38794		-2.0708	8.91363	-6.57998	6.06734
8.58286	-1.90231	-3.72895	7.25548		-0.952957	5.06956	-8.20714	34.0853
-1.81608	17.4516	-33.914	-21.8415		-21.773	-5.01496	-9.23048	33.2572
0.572436	-18.2883	0.524961	32.5176		13.9478	149.877	-2.95146	-13.1073
-0.662636	6.93692	3.65871	18.8709		-66.6594	-58.3189	35.8635	25.8635
-8.20853	9.34743	-10.0216	17.9325		-36.47	-9.88629	-22.7591	-10.6585
-4.22898	2.0803	-10.2524	8.07073		-93.6259	-4.11651	-11.7076	-26.9067
-2.53827	8.9692	-7.34593	10.9772		15.1432	2.46639	-13.1236	-21.5551
0.339524	11.8902	-3.80098	9.01419		-3.55476	12.9219	-120.312	35.9734
0.392124	18.784	-9.55589	4.30489		32.6168	40.5484	-6.36856	-15.9223
-1.36282	25.3207	-5.69517	14.4899		24.3032	46.6664	-21.885	-4.32902
1.65062	8.97357	-6.36771	3.50978		8.57046	16.17	46.6627	40.3534
1.99592	13.0216	-20.4797	23.0911		1.82608	20.1752	1.22098	-8.77902
-8.84964	5.06316	-10.307	21.6857		-47.9976	70.2269	-63.2505	-42.8739
-4.8589	8.56647	6.21678	-13.1442		16.7631	-17.227	-57.6229	-15.2941
-94.8383	-85.6403	-18.2437	26.0625		-15.454	-8.45405	-8.8554	0.26407
3.98776	29.5819	-15.1939	10.1816		-2.68506	6.55546	-12.4785	5.82886
-12.4963	22.6459	2.73051	-4.59245		-4.36973	24.6718	-103.306	-85.7498
-6.93166	18.422	-4.27876	2.72124		14.5476	-2.21038	-16.3274	-0.331074
-0.332908	47.6974	30.7009	5.28952		8.78241	-2.20202	-21.3046	-9.6444
0.16994	7.39696	-16.336	0.383002		8.72991	99.0107	-19.1683	7.29329
-16.7694	15.2508	105.958	89.3389		30.6837	38.6154	40.5737	3.21678
2.6239	-7.3761	-25.1285	13.4946		4.30758	16.4082	-58.0238	-4.41041
-22.9951	2.38032	-6.60912	-15.3141		-35.9635	154.069	22.2364	38.1592
-17.9003	-6.75431	-24.0129	50.0627		23.5205	47.8335	13.3231	42.886
-1.06183	9.7787	-11.3048	3.90738		-7.16913	67.0793	-38.0321	32.8416
-4.21878	3.03537	9.74507	16.9721		-20.1941	11.826	-10.5231	-20.0768
-4.40775	1.90153	-14.4607	24.0746		-10.3963	0.733913	-24.0544	-2.90819
-54.6231	76.5441	164.639	149.925		1.14304	16.4123	9.92941	4.88199
-6.67275	0.327245	154.097	123.933		0.344274	5.34427	-30.2391	-5.69544
-13.4054	10.8511	-27.3195	6.35129		6.93547	-14.4113	-37.0305	-66.2061
-3.5619	6.13231	-8.63865	-21.3155		-6.79635	18.9523	-31.3183	-14.5602
-3.87521	12.8438	-4.10221	25.3248		31.4776	36.4776	2.45831	-3.62134
-4.49142	8.50858	0.555982	11.0412		-2.04193	-9.72442	-45.5943	-39.5718
-6.10591	3.01356	-7.20808	6.0227		-24.7762	7.21645	25.7373	-33.4721
-10.1921	3.80791	-17.8247	17.3174		-22.4863	12.7056	3.43385	-7.59181
-0.612406	13.8959	-5.94206	-0.942061		12.5539	-0.616132	-66.5081	-55.0105
-19.3524	3.85556	-8.64401	1.84116		-126.64	-75.6543	-108.87	-103.87
-18.9272	48.4143	-24.8686	2.98093		96.4351	103.662	-18.3739	-29.3583
-1.97763	4.02237	-3.24441	11.7556		5.45029	-3.28735	-71.493	-54.7977
-2.72238	12.4898	17.1038	-25.285		-19.0909	-32.7099	80.3491	91.3335
-3.61892	9.38108	-2.97595	8.38077		-6.86151	0.738046	-36.1298	-45.2493
-7.10273	57.178	-3.18783	7.65271		-9.63783	22.5025	40.4423	51.799
-0.465104	5.55741	32.3588	-7.86046		-9.54934	13.6046	-54.9358	-66.4433
-8.33291	45.0341	-10.3282	36.1935		26.4003	10.2294	-38.3102	-47.4297
2.18392	29.1586	-22.5608	-14.5608		3.27355	-3.65088	-69.0457	-92.2736
-10.9145	9.19508	-36.7191	44.394		-4.17551	13.828	-6.41622	-0.667432
-4.30499	10.2158	-3.37375	27.1911		88.851	79.6973	-8.31741	2.66702
-4.13472	35.7409	-10.5784	0.945357		-5.71876	-12.9458	-132.255	-38.9942
3.46416	-7.02101	33.1655	-7.23942		-8.57745	-26.9694	-78.1683	-68.6146
-6.23753	12.1544	-10.0427	-2.36021		4.36388	8.36388	-63.4616	-70.7157
-11.6424	10.1388	-5.82419	0.175811		-21.5884	-67.3962	97.0534	108.199
0.621863	6.64438	-9.19857	25.4832		-12.9065	0.263455	-6.20978	-13.2098
-1.2574	-8.2574	-5.56342	1.43658		8.33639	-8.35896	-61.3023	63.9032
15.5305	4.00671	-15.5935	0.342981		-0.490428	15.4461	78.7276	46.7349
-50.4494	-68.0053	-5.32566	13.8699		-21.664	107.602	-15.7517	-4.75167
-3.05859	30.0468	-11.8917	15.9338		-76.6321	-67.5126	-80.1633	-43.2097
-3.40633	-20.1017	-16.8494	50.2403		-50.3327	-11.7642	-78.9329	-98.2939
7.19756	-26.3473	-10.1378	3.20701		-77.431	34.9981	88.7244	74.7244
-9.98831	30.3819	-5.17959	5.30558		4.04588	-2.85266	18.6662	1.90821
8.87717	-2.09782	-7.77335	0.931619		2.83546	-4.41868	168.999	176.57
0.390903	10.3909	-19.3004	-28.4985		3.3959	-5.4371	8.27461	0.703464
15.0631	5.50942	22.0248	-5.80075		-14.259	84.9642	-7.74551	-1.74551
-7.07466	3.92534	4.08609	-6.91391		-10.9634	3.68254	-110.738	-57.1249
16.8249	5.32734	-16.0772	5.99308		27.489	-25.9996	-17.2619	-23.2619
-19.7886	-38.2697	-12.3767	33.4706		-45.6756	-7.14031	-31.6087	-18.3779
1.41642	14.6969	-5.98224	2.83829		-12.2907	-18.2907	-13.2296	6.88005
13.4945	1.97071	-76.291	-27.5542		-9.95429	-0.954288	124.729	131.654
8.30067	14.9104	17.9624	-1.51555		-3.79871	6.20129	-21.8796	-15.8796
2.62324	21.9843	1.55993	-19.2312		-11.2711	5.48695	-12.9745	-42.1915
-5.96554	2.08276	-0.275429	-27.6392		-5.14137	-0.14137	9.03274	-1.99291
3.93103	14.2788	-29.6766	63.5838		-10.2391	1.83342	-9.37014	1.11503
0.824035	11.8497	-18.2827	-4.36986		0.14882	-11.5114	-7.53307	-16.7736
-9.72456	23.3809	0.436086	-12.2112		-0.369315	8.78438	-6.97574	-18.106
-10.3223	19.1047	-14.3878	18.7177		6.61495	-5.48569	-19.5245	-13.5019
14.9841	6.9841	1.68507	15.5458		-3.17283	5.16767	-153.126	-162.28
-4.45999	10.8093	-17.1391	19.7285		-22.92	-30.147	4.4319	-3.99963
18.1343	30.7816	7.06678	18.0512		-4.25997	-10.6291	-8.53208	63.1151
-1.54294	23.8325	7.887	22.341		-1.57945	-6.82203	-12.9214	64.5715
-3.7528	9.30466	-10.0931	0.906942		25.9877	16.434	146.428	131.415
-0.568592	-13.2159	-15.1693	1.00159		-39.8262	-32.255	-11.008	-4.00799
-8.17401	5.2324	28.0593	19.3544		26.7744	62.0484	-22.6038	12.6702
-0.677661	24.676	52.5225	61.2601		-8.19084	-41.8616	-6.8114	28.4626
-4.28097	10.2398	-11.2002	-2.08073		-37.9911	-30.6682	-43.1158	-55.2164
14.4119	32.7193	29.0353	45.8745		3.50389	22.7267	128.405	150.558
-1.51616	36.547	-6.3769	-18.4494		-2.6273	-15.2567	19.2599	10.1404
3.24737	13.2474	0.280917	30.8457		1.76828	-20.3848	2.41883	-6.58117
-8.91873	11.1909	139.087	165.648		-39.7196	-30.1659	7.84678	1.53749
0.853551	9.28508	-15.0365	0.197201		-47.1264	-8.55792	82.0908	68.6844
-16.2484	57.6589	-13.62	12.8416		-6.81095	-12.5597	47.3413	72.812
-66.4021	-4.90315	-5.82302	6.97405		0.496574	10.4966	-8.58614	-1.6617
16.7951	4.05685	-29.8156	7.5413		-99.1219	-81.3994	-6.48315	-0.483152
-0.636276	35.537	-21.1438	4.60488		50.2901	59.4882	-89.5051	-83.7563
-1.70633	9.29367	-34.4825	-4.91957		5.65963	-10.7445	-43.9815	-36.299
-0.24023	30.4393	-6.00757	15.0596		-2.91693	10.3326	-83.0891	-90.3432
-1.13422	39.085	-28.9409	-16.9409		-0.480383	4.56704	-102.7	-97.7004
-2.95383	11.993	-11.4121	3.30144		35.7392	5.05967	-12.8592	-1.30853
7.6503	1.90152	-10.0661	11.001		0.238241	15.5075	-10.2302	3.68257
-4.79502	10.57	-14.0539	-1.95327		-106.517	72.502	92.4392	83.1856
4.95492	14.5445	-11.842	13.5334		6.31733	-7.5631	-10.096	-4.34717
7.25619	13.0595	-4.65276	13.6546		21.6391	-4.9446	-135.631	-123.472
-13.4874	20.3466	-22.6391	14.3145		3.48825	43.8932	-95.6362	-90.0967
42.7151	49.3875	-34.3153	107.755		-13.0494	-4.21645	-89.0002	-17.3531
-12.2048	36.5321	-18.1984	0.997195		1.88744	-6.85021	-178.465	-163.944
-1.96801	8.1878	39.7169	27.7169		-108.338	-69.7698	2.97029	-18.1759
-23.6762	69.2354	-18.8822	19.181		46.733	21.2623	-1.04874	12.8001
-40.1442	10.6067	-39.2185	5.1258		3.39287	10.3929	9.34446	-12.8087
-3.84385	6.50396	2.69017	-12.3227		-3.19091	5.92855	38.0704	10.2209
1.2194	-73.8393	115.566	121.315		-23.5265	-35.0503	-11.5891	-5.21993
-5.01008	8.23946	-12.4705	8.59665		-96.0039	27.3868	0.0779884	-14.4634
9.73499	58.4028	-0.613446	8.16654		-1.54988	-13.5949	-7.62465	-13.6247
-49.7209	-45.7209	-14.3898	0.822433		18.3117	36.0341	-110.542	-124.422
8.8829	21.5015	-14.0376	24.5309		-13.8644	49.3494	-105.6	-46.896
2.12985	35.8083	-8.74968	2.27597		-13.7407	7.30833	-18.6124	-26.544
-28.5097	55.0553	-13.8207	30.4855		16.0719	-0.0990526	28.5509	11.5509
-11.8378	36.899	-7.76148	6.75929		-17.8351	15.7097	-43.3457	12.8206
-21.8018	45.8661	-11.1626	2.45643		-12.3317	26.2367	-5.488	10.2262
-1.35077	13.6492	-9.09803	6.83849		-13.8659	5.98029	-7.01242	3.96257
-1.28877	20.9717	-9.38651	11.7597		-11.3728	10.7803	-108.137	-103.137
-10.0366	9.44129	4.09215	38.1304		-0.828009	-57.6072	-11.2564	-3.68529
-3.97915	13.282	-20.6186	19.8436		-4.47082	-10.4708	-4.51829	3.16421
		-0.177637	-18.6587		25.9254	2.57204	26.1657	15.14
		-35.2625	26.2364		-13.147	23.7206	-14.1949	7.18207
		-5.77582	5.74795		-3.41525	9.83429	-7.48182	17.9889
		-9.80743	6.9116		-3.45345	-30.0372	-35.3991	-15.0225
		-11.2842	14.3099		4.17043	-9.44858	1.88778	-11.3618
		-41.5372	17.0834		-15.2289	-23.5382	-8.49466	18.1268
		14.8992	-17.121		-34.5724	-26.9728	-8.42995	3.17668
		-37.1101	98.8194		-109.962	-100.409	68.4524	37.438
		-11.9975	21.1079		5.77134	12.7713	16.7598	10.0874
		-19.7934	0.316171		5.96377	1.96377	-45.1453	13.5584
		-8.00494	7.6536		29.6254	50.6925	0.335995	17.094
		-10.2516	8.97123		-0.297699	4.7023	-18.4814	-9.32772
		-24.6265	10.5156		-1.63985	52.4821	-12.6849	0.721501
		-10.0899	9.13288		0.233773	-13.627	-1.29691	-21.4065
		-8.02027	11.3408		-4.88231	18.2389	-101.568	-45.5326
		3.46964	-9.17769		-92.2457	-82.2371	-5.01457	1.00795
		51.2791	132.392		-46.1358	-37.7042	57.5147	22.2407
		19.5847	31.0823		41.2509	55.1117	-15.71	-24.415
		48.1274	33.6733		-16.2015	-11.2015	-75.9133	-31.4025
		-18.0087	-0.452741		5.17475	-21.409	16.1568	24.8945
		-18.4449	9.5092		-12.2891	4.46896	-26.7175	-31.7175
		-10.6302	11.44		25.4144	-16.1761	-26.3349	8.93906
		-7.97936	2.1621		9.31001	-11.8362	-70.3026	-35.1107
		-12.0519	0.519478		3.07298	-11.6614	-69.9094	-79.0288
		-3.29957	7.70043		10.1141	4.31082	-44.3448	-23.2776
		-7.79142	3.56529		-58.6366	-49.4829	8.3946	-8.52237
		102.589	112.466		-177.277	-169.677	-16.7202	-5.06003
		144.357	158.206		-172.86	-168.86	-31.4446	-40.1496
		-8.19931	1.95649		-30.2565	-36.2565	10.6736	-4.5957
		-8.42232	-3.42232		-48.5505	-36.3913	27.5519	34.4763
		-16.1859	17.3589		-111.107	-99.7503	3.41471	-6.59389
		-5.30623	5.82401		54.4436	66.4887	-0.800216	7.93743
		-3.60794	11.5343		4.33561	9.33561	-10.2876	-4.28755
		-10.0095	14.2469		-1.45727	6.88323	-65.224	77.1778
		-11.4504	13.9611		13.6703	30.4283	-22.3711	19.2194
		-55.1293	9.29792		-14.0049	1.26434	-48.338	47.7413
		-8.97105	-2.0725		-7.90016	-14.9002	-16.127	-7.42202
		107.818	118.793		-59.7095	-36.5015	-10.4303	-19.584
		5.37553	-5.62447		-118.335	-141.456	-6.79749	-18.3481
		-7.40893	9.34908		-3.8427	4.4978	-37.8218	104.58
		10.0679	4.04534		74.1478	58.4892	21.4111	32.9349
		-14.3349	1.37936		-144.534	-137.307	-22.8986	5.05548
		-8.63218	5.88859		-5.13826	4.54226	14.6595	-2.8965
		-2.44806	5.51335		61.1041	67.1041	3.12782	9.12782
		-36.9543	-22.3791		121.26	154.22	-5.20148	-11.2811
		-4.67222	3.28919		-12.2503	0.98046	-45.4807	-38.2266
		-13.4605	11.915		-38.5872	-28.9067	-6.37776	-34.3318
		-14.3412	36.6002		44.8828	58.8828	4.87696	-11.0596
		4.49142	-5.50858		-5.45475	4.09895	51.9946	57.5341
		-3.57127	9.67827		9.05022	22.0502	-55.8653	-2.25195
		-10.293	5.14291		80.4039	91.4039	-10.4067	7.08357
		-7.06673	-2.06673		-21.2303	139.04	-12.781	3.21535
		-13.5955	-2.04484		58.9578	83.2142	-71.0413	10.4462
		-8.31233	5.6679		-14.2083	14.9673	-3.56207	5.59162
		34.4853	46.4853		7.36843	20.3684	-57.2085	106.519
		-9.54807	1.45193		69.6596	128.28	16.8235	8.48299
		-14.2186	11.2521		-3.1732	-9.1732	-17.3704	16.1745
		-10.6089	-1.45519		-12.847	1.86652	-5.48398	7.686
		-9.19147	33.5021		-9.06989	-15.9943	-34.5246	-13.3784
		-15.6629	11.7008		-11.4497	-30.6453	25.1788	75.4961
		-3.80668	2.50261		13.9167	-2.70196	-3.61201	2.38799
		-5.75993	5.79072		-20.9373	86.2894	-0.750304	-13.9998
		-10.7311	10.4152		-2.25598	9.84466	3.15072	12.3912
		-7.40134	-0.147192		21.5456	4.85024	-12.6416	4.91435
		-2.83699	27.9912		3.79537	-7.23029	-10.9865	1.086
		-11.1328	12.0752		-35.36	136.163	-5.49531	44.6006
		-5.29652	0.725996		49.3748	21.5252	-10.368	6.39004
		-17.5765	3.49064		-55.2715	-48.2715	-16.9759	-33.4525
		-7.59266	3.76406		3.36915	77.4448	-4.61827	-12.2178
		-7.9175	26.7643		-7.2135	11.1356	-16.6389	-31.8726
		-20.1138	1.95645		-7.5772	60.7169	-40.5988	32.0817
		-0.63785	5.11093		19.3779	27.3095	-151.26	27.6053
		-25.9884	24.3289		-17.2591	-36.4819	-2.83493	-16.0845
		-3.64	2.38252		123.662	160.446	-108.289	-117.289
		-16.7427	23.7195		-8.46649	-2.66318	-41.3142	31.6875
		-3.70831	16.5746		-15.1438	55.7299	-1.41196	7.74174
		-11.8405	-4.94191		68.6531	96.5422	-3.5996	23.0839
		-8.47171	-1.54727		83.6426	98.8763	1.5076	-6.5407
		-16.0235	12.7699		-65.4923	-59.4923	-10.0382	3.84218
		-10.4782	17.0065		-10.8062	40.3704	4.72262	13.8421
		-19.9233	-7.85079		-3.55831	21.8171	-49.8153	-24.3446
		-3.6262	2.12258		113.963	149.105	-111.219	8.12731
		-5.90223	5.09777		-13.0362	13.5475	-40.2137	-3.26007
		178.24	161.559		-1.41043	7.58957	-12.9952	-7.24645
		-4.62948	1.1193		-20.6529	7.19663	-0.0960293	-9.64973
		-12.949	0.670042		-101.518	-132.197	-7.55355	27.7205
		-11.553	-1.02849		-3.32079	8.22986	-50.6233	-44.6233
		-10.892	7.70066		68.0101	85.2713	-9.70545	7.1576
		107.594	136.811		27.747	35.0012	42.6749	36.6749
		-10.8169	15.8045		-12.7782	136.057	-7.05011	9.1208
		-6.52544	2.47456		5.41949	11.2228	-8.05815	0.251173
		-4.24032	6.73467		6.3349	-5.71014	-71.6484	-61.1632
		-17.2585	5.94945		-57.6636	-50.0924	-43.6786	-10.0079
		-8.597	-0.597005		-61.5709	-51.5623	-9.81875	-2.89432
		-20.6671	-9.6414		3.27027	-3.72973	-12.1011	11.1068
		-7.09519	0.131828		50.1882	66.1247	-40.7282	5.90194
		-14.9127	15.7668		-111.055	-122.579	-14.2408	11.2299
		0.452167	19.9301		-130.955	-104.372	-111.938	-54.0856
		-4.92501	1.97353		14.0178	3.49324	-12.0691	2.45165
		-8.71256	-1.72245		-32.0483	-23.7078	-11.281	0.26964
		-9.123	3.50643		-7.76364	7.65047	-49.0079	-19.445
		-15.6282	9.84249		7.18951	-5.42906	1.45295	114.304
		141.294	126.152		-28.139	0.902568	-34.6716	-40.6716
		-40.95	-77.7338		-23.8619	139.253	-15.0256	-1.74513
		-1.28278	11.2886		-46.3774	-33.9135	2.1696	-12.3387
		-8.46023	8.25879		8.71163	-5.74241	38.3911	47.9448
		-0.334515	13.6457		-39.9502	-26.0894	25.2131	-10.0609
		-1.33039	4.66961		-1.84229	-27.4364	2.82265	7.82265
		-5.52158	5.50407		4.05835	14.0669	-23.6119	-12.0613
		23.5949	-17.1582		13.5313	2.53128	-77.1749	-69.9208
		-3.82706	7.17294		-24.7071	23.7371	16.8664	-34.1188
		175.516	162.296		108.162	119.147	-6.60175	-0.579235
		-49.8082	166.126		-0.148397	8.97107	-4.03893	0.961072
		-40.3147	-5.17257		81.7297	68.5597	-48.4145	-29.2189
		-0.266784	15.0025		-0.703561	7.22809	-4.14748	-9.14748
		-14.6602	9.54112		177.997	162.134	-2.11423	-17.3264
		-12.6095	1.25127		5.1718	160.873	-20.7286	-29.4336
		-14.8234	1.87191		-2.0474	9.45017	-8.97333	4.25745
		11.8371	-1.96003		20.3178	2.82751	14.5568	-48.9364
		-12.2841	0.935348		39.8437	13.26	-2.97225	9.26045
		-2.06918	6.66846		3.02361	-3.87493	-3.80879	-8.80879
		-12.762	-1.73631		-18.5549	-9.00117	0.699695	4.6997
		-4.23243	4.47254		-7.47302	8.93112	-32.4024	103.527
		3.88866	-54.4626		-35.5618	-27.6301	-71.6593	-94.7606
		-6.4554	16.3629		7.86684	2.32729	5.90502	-3.09498
		-14.2715	6.79564		104.204	91.6327	-9.57785	63.4239
		-0.824911	14.1219		-40.3496	-79.0628	-16.5295	27.8149
		-9.69495	-1.27533		-126.389	-31.8094	-5.38474	-11.3847
		-1.40845	-12.4084		0.316851	25.7875	-5.5844	79.7832
		-54.5894	8.90383		-19.0006	46.2816	-6.4863	-12.2896
		70.6331	56.6331		123.653	116.399	151.14	158.712
		-3.68851	13.8018		22.0795	8.86005	-15.8703	5.47645
		-8.48861	1.51139		53.6529	36.7898	-5.32264	7.30679
		-15.2048	27.184		40.7016	-1.59087	10.4981	16.2469
		-5.67283	8.32717		23.8945	1.84322	-1.17215	-12.1721
		-15.8744	0.296556		-6.71627	2.11672	-8.90913	15.4039
		-16.6624	-1.45024		53.7191	64.7447	32.7069	64.8473
		54.105	36.0375		14.5322	-0.467791	-111.745	36.7515
		-7.57216	4.99923		2.98222	-9.09027	-19.4055	-15.4055
		-7.19211	6.72069		-48.4741	13.8409	-4.8203	4.42022
		-9.93765	42.5436		38.0294	10.6656	-3.9706	-17.251
		-1.03938	48.3442		-2.97147	4.02853	41.8705	74.0108
		-14.0502	22.9034		-41.6924	-27.7796	-7.7923	77.183
		63.5134	56.2864		2.06367	17.0766	-1.2487	-7.92111
		-15.6763	23.2796		53.6856	44.5661	27.8388	11.9023
		1.22215	25.4443		10.703	2.74155	-4.76183	-13.9155
		-10.6627	-1.10905		-21.1486	21.3391	0.090726	27.9797
		-28.6246	18.5145		-31.2619	-22.5569	3.44056	88.489
		-15.6432	3.83475		1.78601	-7.04699	-24.4233	2.26019
		-10.1374	15.3333		-0.423019	-6.42302	-65.7359	57.6548
		-13.7932	7.58384		6.70492	0.704924	-22.9836	12.2904
		-34.9559	35.7529		121.328	135.782	-17.7368	3.51189
		18.4449	28.4449		25.781	18.5539	-13.931	-30.65
		-6.82732	5.27332		53.7372	73.5834	-12.9826	-1.98264
		34.9993	47.0718		-24.3286	10.9454	-6.52292	0.375627
		-4.73666	-10.7367		5.0662	12.2932	-2.19096	-10.1524
		4.78601	-9.01108		-5.09689	-11.9954	9.41766	26.1757
		-113.359	-103.482		112.976	89.8549	-17.1177	-0.359713
		-21.0798	-3.07626		-7.08714	2.60706	-19.1651	11.5145
		-6.52278	7.32608		3.47614	40.4298	-23.2752	34.5775
		-6.55631	3.44369		1.94007	36.592	4.66145	-31.9848
		23.7605	-19.8104		-3.82812	-8.82812	47.4531	81.1238
		-4.98359	10.3814		-14.5864	11.044	5.92292	-0.386363
		-19.2755	-5.99507		-13.6894	30.6549	-40.8775	23.5498
		-25.1608	15.2094		-77.9039	-64.9039	0.557182	-17.8347
		-17.4555	-3.59474		-84.2312	-74.2226	-12.8378	36.0127
		-22.9413	23.4746		-23.0705	-38.7983	-41.6519	88.0993
		171.783	158.726		5.98299	-6.08949	57.6852	78.8314
		-7.46606	7.07529		-11.4555	0.616945	-92.6472	-85.7487
		-9.58669	3.6441		-76.298	-48.3439	-2.38876	3.63376
		-5.31163	5.67279		167.643	156.643	-7.26333	-0.263334
		-8.10608	10.243		134.069	170.853	-5.9695	24.5953
		-13.2822	7.9665		98.1523	56.378	-11.0136	-5.2648
		2.59503	-9.47745		-146.681	-95.7398	18.2656	-11.0195
		-12.4356	33.9803		-7.07093	6.15986	-1.92846	33.2635
		-4.67719	9.18359		39.7394	27.168	-12.2366	32.0696
		-28.5058	3.51442		0.428878	9.58257	-1.12251	9.90314
		-9.69645	4.82432		0.578538	28.0632	-8.40238	36.5306
		-10.5595	2.44054		-3.15104	9.49629	-11.1015	9.00807
		14.7503	38.2115		-4.8156	9.72575	-11.5099	-3.93876
		113.905	122.214		-34.9919	12.8271	-4.47719	1.52281
		-27.4667	2.13801		14.1018	2.57803	-14.0314	35.2825
		-6.64376	22.7833		-8.11148	3.93356	-7.27639	-0.276394
		-7.24304	4.802		-0.438121	-32.5037	-33.249	-40.8486
		-4.74451	-12.3157		-4.85329	10.1467	-28.1955	18.4347
		-7.31737	3.82861		14.1133	20.1358	50.5801	58.1513
		-17.6313	33.4262		-12.7623	8.28677	5.29452	14.0322
		-76.8713	-6.32332		-8.46309	15.8499	-2.66591	2.33409
		-11.8736	-18.1829		62.1855	79.7415	-17.5267	-0.0363909
		8.90121	21.4726		38.8078	29.8078	-11.3909	37.2769
		-3.28626	17.7809		-1.45736	9.89935	-4.79754	5.35826
		-2.08938	5.91062		9.58017	-41.3612	157.054	163.077
		-13.9803	13.4808		-1.74623	14.7162	-7.98424	7.97487
		-8.57374	2.40125		0.81786	-6.86463	-70.8513	58.4148
		142.473	130.473		4.64407	19.1854	27.5582	-18.9635
		-8.91787	-4.91787		10.1997	4.45095	-73.4899	-26.3509
		-1.39189	-36.8369		4.76925	-0.230754	-6.13793	-12.1379
		-4.19552	-21.0586		0.0969064	8.02855	0.0355122	-14.4853
		-20.9293	-5.66		-13.1464	-5.54685	-11.8455	-27.1148
		-28.4809	24.6865		99.9998	87.7671	-31.8522	53.3168
		4.17254	-13.3426		-47.3326	108.369	1.00593	-6.56521
		-5.66126	15.0384		-5.25136	9.25693	-34.0604	-8.58976
		-0.962173	-15.6081		13.6246	-2.77958	10.4452	40.6096
		21.9846	9.9846		33.0968	-34.3982	3.58042	-6.57538
		-15.4673	-2.65213		-19.1206	9.54614	-13.4025	-0.755184
		-5.60251	7.39749		0.266589	16.1894	-2.35752	-11.5112
		-16.3798	-1.66625		-88.5927	57.4394	161.995	176.995
		-7.76085	-18.6014		16.0882	-4.02145	-4.03055	6.80998
		-1.30306	-11.3031		6.90936	-2.64434	1.65153	-4.15179
		-19.2913	8.53429		27.9426	102.551	-18.1931	20.5201
		17.2179	-1.1312		-14.5679	22.0784	26.2972	34.2586
		-3.64673	9.09154		-39.4116	-5.73313	1.50199	-9.49801
		-0.836238	17.7564		2.14786	-3.85214	8.5896	0.2491
		-25.2964	-42.8115		109.065	94.1178	78.1661	-5.39881
		-21.6903	-63.8246		-85.4661	-100.466	-114.221	-102.12
		-8.07477	10.4063		-16.2855	73.147	28.0884	9.49582
		11.4247	-1.74525		7.58099	19.6535	3.32989	-7.67011
		-30.013	7.8827		-62.0567	-67.8055	-14.5901	24.1231
		-22.4342	38.6955		-26.7576	-9.03513	-13.6632	-3.96897
		-15.751	3.61007		-87.3442	-81.2646	-16.165	-2.54597
		-34.4598	-10.0289		-44.9452	-56.9452	-18.1027	5.10521
		-15.1593	31.4709		-15.748	-34.1399	-81.4882	-60.4391
		-21.7994	-31.3531		22.6096	29.6096	-57.7007	-86.9925
		-28.1966	41.4871		37.9343	2.74241	73.5248	67.5023
					5.75527	-34.6149	-85.7128	-111.833
					-10.3026	18.4908	1.18444	-4.81556
					-8.51116	4.70826	4.66453	-9.01467
					-3.00417	5.33633	-68.6658	-61.7673
					0.405308	-11.6672	9.03469	-7.06191
					-6.76688	8.23312	-16.8586	-12.0406
					-10.0747	64.984	72.6486	83.6486
					-10.952	-23.5993	2.15918	-3.86334
					-40.4436	83.122	4.93312	20.8922
					4.88725	113.284	-6.68798	3.18951
					4.06589	-6.41928	1.29005	7.65918
					-5.42108	19.1573	-16.2956	0.423376
					24.9323	7.68595	-5.2702	-15.8945
					55.6729	35.8267	1.96347	-7.15599
					114.053	91.8998	10.7427	3.1716
					8.35227	-2.1329	-5.68586	2.27555
					-25.2732	-44.4688	85.4303	122.734
					7.70219	35.0659	57.4514	64.3758
					17.372	0.895382	75.1607	88.3915
					-0.470572	8.52943	-48.574	7.33409
					1.92603	-11.9868	-65.9001	-53.2232
					2.77969	-10.4698	-6.43087	-0.408357
					-10.4437	4.5563	8.58393	-15.6174
					2.09274	-3.90726	-116.835	39.4508
					-4.72672	18.2882	-20.711	-4.54011
					6.97225	38.9924	-14.4714	-2.42636
					4.33357	0.333566	8.93897	49.4955
					-85.7771	51.4417	-84.5819	38.8088
					-1.8007	10.1993	-16.1625	34.1548
					1.43173	-6.52969	-12.732	-6.92867
					-7.50301	5.74653	-4.31551	21.0599
					-18.1128	59.671	-17.9971	-4.13637
					79.9874	92.0881	-9.95759	3.2732
					9.05775	1.8036	-23.6652	131.902
					22.2793	5.36236	-5.05513	37.2737
					-1.85577	-15.1053	39.8101	93.4235
					-7.79774	5.88146	-5.94507	56.37
					-12.9285	0.951908	11.1252	1.03032
					21.7664	34.9972	-41.6275	-28.9507
					-1.98288	-15.8437	-22.4478	33.5877
					-21.3016	-8.02116	-1.04883	-14.3293
					-42.4092	13.757	-73.9796	-78.9796
					-9.14321	24.5275	-80.0719	-93.8689
					10.3335	-3.28554	-59.3646	-64.3646
					7.8589	17.8589	-88.1854	-45.2341
					6.90581	-5.16668	-36.0342	-30.2854
					-2.96508	9.03492	10.5086	25.7207
					-7.62377	9.05724	-77.3012	-40.5174
					5.84301	-2.20529	-27.4643	-38.4488
					8.26347	-8.45556	-58.8955	-52.8955
					-11.9938	18.0379	-31.2848	-18.2848
					0.601889	21.7481	-111.101	-121.942
					-9.62377	-15.6238	123.923	109.402
					-14.9475	36.2291	42.8045	145.246
					0.204383	-8.50059	-91.1191	-82.1191
					-0.377149	-9.21015	-80.0963	-63.3383
					35.6195	26.3789	56.992	70.2228
					2.98583	26.447	97.1314	84.4841
					-3.1134	-18.0602	8.49661	17.6161
					-80.6312	-73.4042	-12.5931	-25.8126
					-0.00561413	12.9944	-10.1171	-30.9083
					7.53277	-2.34472	120.32	158.943
					-12.2116	31.9289	-51.7424	-43.7809
					-7.85491	9.63541	-46.8765	-30.4724
					2.80181	22.0246	48.2127	54.2127
					3.23301	-2.78951	-75.1554	-53.1041
					8.16619	-6.35458	-3.64209	16.4675
					27.4318	48.223	54.0999	74.2095
					9.61922	-3.38078	92.7108	76.7517
					17.4599	7.58238	-5.83008	3.32361
					-5.74442	1.4826	94.6048	131.42
					-76.7761	-67.2225	86.7879	120.179
					40.2464	51.2464	6.01215	19.2429
					-92.9522	62.97	31.6612	40.4064
					-21.968	-11.8122	125.291	114.652
					-6.05211	6.94789	-115.974	54.9085
					47.2871	-1.56343	-9.02768	4.22186
					20.7504	4.57954	-16.2813	17.3894
					-4.48177	10.5182	38.219	61.2339
					-65.7357	-52.5049	108.678	143.952
					2.81652	10.0435	49.7614	162.612
					-3.37344	9.62656	-33.7253	-22.7253
					19.4207	37.4243	-31.5247	-6.14926
					100.502	91.7639	42.7836	140.936
					-58.7269	-42.7305	-42.3996	-47.8919
					-4.36992	-13.5236	5.78172	-11.7086
					55.1041	42.6401	-17.5532	118.376
					0.567977	31.1761	59.6867	111.349
					12.8913	97.5489	-4.2893	16.7778
					-6.78668	9.13615	72.929	16.7628
					27.0249	9.02494	60.9091	49.8834
					-109.942	-99.1019	-0.886877	-12.3943
					-3.28705	11.6598	8.9658	-1.0428
					19.668	4.93366	-60.94	74.6731
					8.10728	-7.85183	36.2791	29.0249
					5.422	-0.577997	96.8306	104.085
					79.3198	67.2473	3.30648	56.7194
					-1.76701	8.23299	57.9233	120.238
					-6.80947	4.54724	-25.3331	1.5176
					11.0937	-9.04447	-14.0239	-23.5776
					-6.53199	-34.421	-90.3592	-130.764
							-17.541	-2.27168
							21.0141	44.168
							-113.111	57.7715
							-2.51945	-23.5866
							-77.151	110.658
							-92.6017	0.309929
							-13.8094	39.8039
							76.5626	107.101
							-9.33434	-14.3343
							36.0328	60.3458
							-7.50684	10.8851
							-74.8513	-62.0543
							9.68972	15.493
							-5.17093	21.4128
							-5.81887	6.9963
							-25.9775	-35.1311
							-11.6464	16.2426
							-40.0425	75.6855
							-103.587	-87.5906
							-75.0429	-49.6675
							-35.0106	0.263437
							126.998	145.321
							35.0509	46.5747
							34.4041	52.643
							-6.49309	6.50691
							-67.9693	-72.9693
							-4.75902	8.41096
							-15.8174	107.748
							-23.5458	118.856
							-68.0399	94.9352
							13.9199	-15.6848
							-3.7565	-16.5717
							6.18986	82.6019
							42.884	48.884
							-10.6457	-18.694
							-62.1515	-0.652554
							-69.3046	-75.3046
							-105.963	-28.5362
							-11.9625	-25.1933
							-48.0587	-34.4397
							-89.7018	-76.4523
							11.4843	-0.560765
							-27.5382	-19.5768
							4.03826	31.9273
							34.0515	76.5391
							-47.133	-76.1746
							21.7228	26.0753
							-48.6311	-82.2235
							42.3448	119.838
							-5.68907	-13.7374
							69.0603	54.1135
							-120.384	32.6014
							26.1945	-10.4518
							-2.80784	16.415
							28.4808	13.534
							-59.3769	102.989
							-104.374	-93.3738
							-14.4579	141.11
							-65.4421	-54.8027
							-30.2856	-13.5276
							-1.40459	-16.4046
							10.6642	20.2179
							121.959	130.792
							13.97	131.651
							-6.63732	17.5848
							60.3206	51.1669
							-47.1175	70.1237
							9.38794	33.61
							-46.7932	-52.8157
							92.1559	82.1473
							-2.81224	-15.4891
							0.969189	-6.63037
							76.0931	99.9773
							-39.8565	-1.28807
							-23.8686	-38.8686
							-29.221	73.6282
							-50.7218	-42.6735
							-47.2025	-65.5256
							121.171	107.89
							-118.759	-0.534221
							74.9702	85.9702
							-103.416	-80.2625
							5.84971	15.0034
							-24.6702	0.800501
							-14.7882	0.424037
							-14.5334	-27.1807
							49.8869	136.186
							0.610375	-9.39823
							120.07	127.641
							146.07	160.524
							-10.5108	-23.7603
							-4.26735	30.8748
							-9.33958	-16.9107
							61.6775	74.897
							-10.1232	-3.12321
							7.82745	-3.01308
							-0.116102	-13.9965
							160.939	174.558
							112.438	134.833
							-5.94856	1.73393
							-31.0646	-21.0646
							-12.2955	-22.6433
							9.73345	-2.26655
							86.7959	60.9574
							16.9731	54.33
							30.8505	49.0895
							9.1545	-1.99148
							47.8228	39.1178
							-7.73797	14.554
							-2.00064	11.8601
							-15.1752	4.93437
							-33.0204	-18.6898
							-5.22404	-19.1045
							-22.7695	68.9429
							-2.59886	-13.5989
							-85.8445	-56.8029
							-6.37868	74.9193
							-52.8316	-21.8173
							19.7477	7.1004
							-2.55464	-14.1053
							-13.3668	1.29982
							-4.09559	12.6624
							-9.75556	3.86344
							14.6045	2.60448
							-33.8075	-17.1888
							-87.0624	-80.1379
							-7.29495	11.9279
							78.7604	52.2988
							2.57755	-12.6346
							14.8821	-28.6887
							56.2014	69.8204
							66.9863	77.9613
							-60.2878	23.5744
							9.9298	-8.55124
							17.6124	-15.3473
							34.4594	21.2894
							24.1598	52.9532
							4.71967	-4.83402
							1.2192	-5.7808
							-5.33775	7.23364
							1.23966	9.20108
							-69.0841	-87.0876
							-3.4576	-11.7981
							13.3291	-15.3376
							9.63642	-6.22687
							8.07712	13.0771
							-39.0845	5.22176
							-59.3384	-20.7153
							-61.4238	-68.4238
							37.2231	31.2231
							-10.3404	33.2305
							7.69115	13.6912
							-53.4917	-68.4917
							-42.2643	-61.1922
							-105.377	-133.331
							-34.4545	-2.1584
							-4.011	0.989005
							-32.1081	-25.1081
							-2.48746	-14.5599
							1.29599	-11.3226
							12.555	-2.44498
							2.3428	24.7377
							-10.0479	-19.2016
							-10.505	-3.27797
							2.63903	-8.36097
							-9.25188	9.94373
							-20.883	20.8913
							-19.7386	20.7236
							77.9219	63.5914
							-3.05168	-19.5142
							147.181	138.181
							4.32569	-6.67431
							161.205	172.351
							-15.2913	1.18533
							-7.50059	-36.1673
							-32.6756	96.4794
							78.3887	65.7701
							57.9971	151.338
							-10.4951	3.77235
							-115.118	71.5636
							11.8672	-4.8282
							1.00596	-5.30333
							-26.578	-7.47061
							-41.5213	112.14
							-6.97741	8.25634
							-12.1191	8.94804
							-10.5649	0.95884
							-12.8744	24.3108
							116.307	149.899
							88.2526	76.7019
							4.27001	-1.72999
							-1.15715	-22.5341
							-26.871	-7.02482
							-7.46121	-0.536775
							-79.8818	-68.9068
							-18.9808	-8.98078
							-12.6693	-0.0979402
							81.7849	85.7849
							-8.57249	2.95128
							-7.91639	19.4474
							-43.0268	-17.5561
							-12.5448	-1.90546
							-2.96205	-15.962
							14.2333	-51.9905
							1.76343	-10.3091
							2.83386	-62.1484
							-27.9476	-8.04285
							-12.9734	10.38
							-75.3088	47.9758
							10.0497	139.801
							-31.2139	81.3745
							-9.99097	-18.991
							39.6732	25.6732
							14.4227	-17.1781
							-12.7895	3.20687
							24.2169	-17.9174
							2.5165	13.5165
							-77.1203	-71.1203
							16.1946	-0.990672
							11.0139	-7.225
							-1.93796	-14.0104
							-15.6801	-26.7057
							-13.5534	16.871
							-18.7645	5.03512
							21.66	-1.44126
							-14.9048	-2.83229
							69.7169	81.7169
							-28.0554	55.5095
							-16.5095	8.42338
							-2.92721	8.59656
							5.71062	-5.28938
							-11.4436	1.72637
							-23.2523	-16.3538
							-4.82854	-14.8285
							-14.2107	2.7302
							0.477775	129.744
							28.2445	33.9933
							-11.1451	29.3171
							-16.6544	1.65295
							-10.2298	0.74515
							1.01952	-14.8438
							-17.3787	-2.10942
							-5.12669	-18.1841
							-23.9918	-9.04495
							-4.06695	-10.067
							-71.1913	-59.6675
							-34.7343	3.83417
							3.06504	-10.1049
							7.5549	-9.14045
							-141.175	-116.919
							-13.8632	4.20434
							14.3603	56.6891
							-3.15321	-11.8582
							-6.00058	42.4436
							2.65894	41.3721
							-43.2122	-62.9711
							-5.31022	0.712297
							-34.8642	87.9595
							-39.2793	-23.3202
							-5.38631	28.6038
							-10.266	1.77903
							-38.5683	-45.5683
							-12.5394	-20.88
							122.13	110.13
							-32.9224	-21.7765
							-95.5922	-106.949
							-15.3182	3.03088
							28.4275	37.1651
							-23.7844	3.15221
							-13.813	5.13112
							-5.79296	0.207037
							-30.4515	10.5476
							50.9011	77.5225
							11.2495	-10.5317
							-4.88805	7.68334
							-6.3825	8.6175
							-102.775	25.897
							-36.3937	22.2269
							-8.49481	-0.533398
							-8.37006	13.3152
							-37.0134	7.98309
							-68.2683	44.3201
							-1.80283	7.75087
							-77.7089	52.0423
							-7.63687	1.0681
							18.4088	71.7758
							-14.112	-8.11201
							12.392	98.5694
							-15.1532	-1.98325
							15.4982	-4.04763
							-55.6613	-23.6411
							-8.4905	1.60435
							-16.3497	25.7846
							-31.3821	36.1129
							-4.85272	2.07171
							-8.48973	103.939
							9.35116	-5.10288
							-14.282	-7.38347
							-10.161	12.2338
							-7.77511	5.22489
							-96.1014	-116.211
							-46.8833	6.73003
							19.3782	30.3782
							35.5158	22.2964
							-9.56529	12.486
							-12.4123	-3.67467
							-8.36788	-0.406468
							6.68304	-2.87065
							-22.9491	-7.23485
							-16.9982	12.1523
							21.7989	34.3703
							-0.293891	6.70611
							9.40045	-13.4178
							67.4963	57.4014
							-31.3669	-17.3669
							146.684	167.733
							118.364	65.1963
							-9.84021	-27.0866
							-42.4166	-61.524
							-5.27597	3.92209
							-72.8671	-80.4666
							19.3964	7.32388
							170.004	160.885
							-47.4999	-38.7623
							-9.88043	3.28955
							-24.5895	-45.8683
							-100.797	28.6525
							-51.7904	-37.5229
							-23.9882	-31.3112
							-10.8942	-2.18926
							-76.9003	86.0748
							-11.243	-5.24299
							-17.1738	-2.84325
							-13.3733	-6.37327
							32.3409	-4.5267
							55.2381	-40.8413
							0.266715	-26.2942
							7.10744	-4.93759
							2.88412	-10.1733
							13.9361	-9.60694
							146.968	115.954
							3.51939	20.2384
							-0.833307	-10.8333
							17.101	-23.3039
							100.761	161.368
							23.2747	79.3102
							-38.5081	-9.08103
							114.376	100.108
							25.8742	6.39632
							-76.4081	-55.7084
							-5.82044	0.179556
							10.1137	-16.3478
							-31.1408	12.6226
							-0.374653	6.87949
							-2.1675	-12.743
							-40.6905	-26.8101
							-1.26138	-15.8027
							-112.294	-96.4311
							-12.9541	-1.95409
							-5.56869	2.43131
							1.63749	-9.71922
							-9.98016	0.994828
							3.06903	-24.7566
							-58.3049	-42.134
							-62.7041	-51.7041
							-13.3849	-0.384895
							-144.47	-132.973
							-39.6119	-51.657
							-51.7303	-37.7501
							-13.1711	-5.17109
							22.0551	9.59113
							83.6741	153.358
							-11.4396	66.0534
							-1.43144	16.8917
							-1.33498	-11.3436
							114.249	98.5213
							18.4374	-45.0012
							-45.0485	29.6653
