# Supplementary material for: Multiple time-scales of decision-making in the hippocampus and prefrontal cortex
Source: eLife. 2021 Mar 8;10:e66227. doi: 10.7554/eLife.66227 (PMC7993991; doi:10.7554/eLife.66227)
Supplement: Figure 4—source data 1. [file elife-66227-fig4-data1.xlsx]

## Sheet: AsymmetryIndex
CA1															PFC
Session 1		Session 2		Session 3		Session 4		Session 5		Session 6		Sessions 7-8			Session 1		Session 2		Session 3		Session 4		Session 5		Session 6		Sessions 7-8
outbound	inbound	outbound	inbound	outbound	inbound	outbound	inbound	outbound	inbound	outbound	inbound	outbound	inbound		outbound	inbound	outbound	inbound	outbound	inbound	outbound	inbound	outbound	inbound	outbound	inbound	outbound	inbound
0.27746	0.00293262	0.11557	-0.451968	-0.124497	-0.782857	0.137049	0.162234	-0.422673	-0.161532	-0.432347	-0.563218	-0.148309	-0.219057		0.59812	-0.973865	0.134939	-0.411554	-0.523245	-0.564971	-0.663866	-0.593421	-0.512866	0.239811	-0.537893	-0.622748	0.265018	-0.715761
-0.258278	-0.689034	0.030422	-0.29116	-0.0878214	0.423349	0.32685	0.637188	-0.2507	0.378238	0.119105	0.0790483	-0.11527	0.244561		0.94377	-0.751536	-0.781047	-0.656091	0.066719	0.0385249	-0.316196	0.00653019	-0.38771	0.369757	-0.665215	0.0925877	0.539558	0.275495
-0.126067	0.166961	-0.410538	0.302181	-0.410725	-0.175845	-0.553561	0.165644	-0.091196	0.128147	-0.220779	-0.15454	-0.0332326	0.141365		-0.86114	0.602308	0.39488	-0.550054	0.130348	0.167046	-0.507212	0.355313	0.0921502	0.0971642	-0.0839897	0.275659	-0.260907	0.101308
-0.340491	-0.507656	0.614983	-0.451215	-0.358683	0.409396	-0.0429275	0.326683	-0.505314	0.202814	-0.476061	0.0958691	0.158081	-0.573034		-0.682636	-0.99378	-0.344262	0.210623	-0.729664	0.173696	0.251385	-0.0403121	-0.243749	0.221658	-0.461846	-0.219993	-0.0262457	-0.275424
-0.441964	-0.0876133	0.452216	0.515002	0.0968921	0.286438	-0.0932868	0.0691212	-0.217949	-0.146098	-0.27314	-0.211666	-0.0247506	-0.629375		-0.57492	-0.0189027	-0.865358	-0.37616	0.00977199	-0.115055	-0.600286	-0.0496874	0.0313507	0.105145	-0.33295	-0.509826	-0.150474	0.698644
-0.557032	-0.0947795	0.424137	0.023569	0.141782	-0.319761	0.232134	-0.117954	-0.143201	0.406263	-0.0320988	-0.445882	-0.00220865	-0.00985554		0.366035	-0.815713	-0.383097	-0.313482	0.371027	0.509346	0.503268	-0.364067	-0.1154	0.480519	-0.430432	0.510703	0.237822	-0.451521
-0.245902	0.507524	-0.0618762	-0.64486	-0.0911361	-0.121759	-0.137324	-0.626928	-0.06481	0.0458716	-0.327668	0.152357	-0.0119645	0.461538		-0.163964	-0.652761	-0.0973417	0.24149	0.180961	-0.134939	-0.394745	0.257069	-0.0145077	-0.605129	0.0418398	0.261993	-0.328671	0.0668248
-0.486155	-0.0138805	-0.0494541	0.0098289	0.291248	0.00293255	0.0160296	0.225806	0.0690423	-0.447572	0.266094	-0.618497	0.192951	-0.133518		-0.586888	-0.750547	0.181165	-0.142758	-0.523021	0.404392	0.123919	-0.0131675	0.178782	-0.575419	0.025641	0.480519	-0.272427	0.748954
-0.367143	0.434883	0.28829	0.0622182	-0.435768	0.137725	-0.664492	-0.142098	-0.184652	0.203899	-0.280899	0.0935871	0.139983	0.112008		-0.426756	-0.985655	-0.147789	0.237141	-0.660796	0.468018	-0.127637	-0.20983	0.620948	0.032967	-0.139825	-0.117498	-0.642857	-0.328878
0.101713	0.583333	0.210682	0.366906	-0.190361	0.391976	-0.717514	-0.00633914	-0.567481	-0.26369	-0.165247	-0.260023	-0.0166305	0.303359		0.8034	0.495695	0.757619	-0.688573	-0.388516	-0.325444	0.248259	0.12426	-0.518336	0.312779	0.00308642	-0.680672	-0.477655	0.0857143
0.616162	0.927118	-0.272727	0.00293255	0.180698	0.432208	0.0781671	0.166351	-0.0513834	0.101124	-0.0299572	-0.174398	0.0331534	-0.0405509		0.756126	-0.684153	-0.731703	-0.298392	0.264016	-0.0115607	-0.656898	-0.025641	-0.56912	-0.325967	-0.487394	0.25983	-0.454545	0.139785
-0.54717	0.0966123	-0.0458716	0.26868	-0.00466563	0.583333	-0.23913	-0.235133	0.271233	0.213759	-0.521964	-0.266094	-0.508105	-0.0460251		-0.141631	0.404302	-0.552042	-0.312935	-0.810097	-0.0547264	-0.590383	-0.292743	0.47541	-0.554027	-0.208644	-0.320755	-0.521455	-0.108214
-0.681256	0.858574	0.0344828	0.186911	0.0810811	0.441118	0.182209	0.352751	-0.644839	0.315221	-0.676818	0.333333	-0.0405757	0.584965		0.732394	0.529233	0.639207	0.665513	-0.767976	0.688889	-0.436312	-0.108742	-0.381034	-0.277359	-0.318155	-0.268178	-0.469229	-0.382114
-0.222682	-0.548939	0.0512484	0.0846755	-0.134328	-0.139518	0.165234	0.212254	0.278066	-0.0423826	-0.35085	0.00715187	0.025641	-0.239015		0.259843	-0.114872	-0.834302	-0.748856	-0.457744	-0.539208	-0.336982	0.310345	-0.134912	-0.415759	-0.289728	0.170013	-0.601454	-0.624721
-0.0760059	0.728555	-0.179601	0.437269	-0.253945	-0.0107198	0.394422	-0.00977199	0.22449	-0.443067	-0.169649	0.136691	-0.128713	-0.0185016		0.439722	-0.0787879	-0.223409	0.770533	-0.0243902	-0.498737	-0.918953	-0.581148	-0.289941	0.389016	-0.304698	-0.656532	-0.625255	-0.118043
-0.790576	0.739573	0.199745	0.310345	-0.611046	0.0469099	-0.409341	0.0980458	-0.208158	0.270517	-0.0889052	-0.15346	-0.686684	0.304348		0.298536	-0.390374	-0.419087	-0.0900083	-0.642193	0.388516	-0.738145	-0.699605	-0.616825	-0.485747	-0.134633	-0.34357	-0.414166	-0.345853
0.846706	0.712891	0.203282	-0.133186	-0.480519	0.233038	-0.380342	0.489844	-0.360882	0.592299	-0.310345	0.0222222	-0.107075	0.0254873		0.410437	-0.319138	-0.780498	-0.119541	-0.736188	-0.794277	-0.530201	-0.550054	-0.316969	-0.474388	-0.603257	0.33099	-0.301746	0.0885417
-0.228007	0.523294	-0.104681	-0.409797	-0.105145	-0.00452546	-0.196787	-0.0921502	-0.162641	0.236209	-0.0243902	0.552688	-0.0369181	0.235843		-0.592549	-0.178225	-0.116883	-0.425226	0.12532	-0.653272	-0.0857143	-0.667361	0.47596	0.544396	-0.228761	-0.240524	-0.541382	-0.494505
0.908213	-0.647332	-0.279561	-0.00043122	-0.480519	0.358816	-0.357143	0.128238	-0.153634	0.356461	-0.206349	-0.0755442	-0.148936	-0.0132996		0.352705	0.778455	0.406462	-0.0650696	0.486486	-0.374531	-0.723742	-0.444077	0.462264	0.0172351	-0.261667	0.142758	-0.548458	-0.42004
-0.409177	-0.42004	0.106067	-0.509434	-0.0563277	0.049676	0.250601	0.252004	-0.366906	-0.0965946	-0.0410959	0.0531178	-0.343926	-0.380356		0.61472	0.355962	-0.129512	-0.367098	-0.659467	-0.445187	0.517241	-0.0420168	0.05	0.15493	-0.555099	-0.381246	0.567164	0.0857143
-0.701492	0.93994	0.0867294	-0.505065	0.366164	-0.0817031	-0.292974	0.0717601	-0.562295	-0.0409155	-0.218968	-0.264712	0.0512484	-0.309091		0.109322	-0.582418	-0.322672	-0.470215	0.547619	-0.025641	-0.300934	-0.348056	-0.192825	0.469456	-0.467327	-0.521739	0.196748	-0.0810811
0.109741	-0.236476	-0.461128	-0.07171	0.126437	0.160305	-0.175258	-0.0635869	-0.215686	0.190361	-0.644839	0.301979	-0.348035	0.253945		0.82771	0.0538336	0.24	0.181198	-0.103506	-0.693446	0.732061	0.190171	-0.20904	-0.0986267	0.15016	-0.102362	-0.659838	-0.508806
-0.637188	0.617724	-0.157415	0.30575	-0.606857	0.10842	-0.52815	0.376378	-0.1618	0.29099	-0.315947	0.609121	0.0405509	0.045532		-0.78611	0.720206	0.339852	0.0736452	0.826484	0.800499	-0.581571	0.265585	-0.586064	-0.467787	0.377049	-0.344538	-0.149446	-0.76018
0.122558	0.742558	-0.545309	-0.201024	-0.261993	0.0245837	-0.462431	0.0342406	-0.239615	-0.00308642	-0.134763	-0.173913	-0.141631	0.0900099		-0.624352	0.161572	-0.458239	0.311656	0.120086	-0.642083	-0.0424602	-0.360993	0.0904255	0.413754	-0.403208	0.165478	-0.115717	-0.025641
-0.414894	0.0389395	-0.266667	0.310345	-0.349752	0.150757	-0.421391	0.353654	0.143017	0.259711	-0.462309	0.0394654	-0.497066	-0.025641		-0.721254	0.431414	-0.0225151	0.0946502	0.451923	0.498035	-0.288136	-0.00732945	-0.0220049	0.109875	0.047836	0.253945	-0.10888	0.217949
0.293875	-0.238012	0.27031	-0.19403	-0.280899	-0.266409	-0.156909	-0.383043	0.0981852	0.102354	-0.23615	0.22234	-0.297023	-0.20025		-0.542767	0.695943	-0.176447	-0.358767	0.316705	-0.39865	0.00265408	-0.184308	-0.440066	-0.346226	-0.0800299	0.315947	0.27603	0.40583
0.382114	0.20982	0.119105	0.22252	0.0460251	-0.479616	0.097357	-0.391304	-0.383471	0.503839	-0.124369	-0.359675	-0.258959	0.482088		-0.59142	-0.719529	-0.315441	0.707137	0.267218	0.109352	-0.668698	0.192825	0.45305	0.551641	-0.303635	-0.129589	-0.0974729	0.191102
-0.376905	-0.215067	-0.344793	0.235182	-0.665394	0.365751	-0.219976	0.0225796	-0.0780142	0.135937	-0.131915	0.510703	-0.15878	-0.530637		0.795918	0.553186	0.493333	-0.121129	0.025641	0.318537	-0.0922844	0.192825	0.374853	0.00621118	0.22449	-0.203008	-0.27105	0.113222
-0.34005	-0.104793	-0.439808	0.255468	-0.686684	0.102902	-0.625668	0.154557	-0.352751	0.324182	-0.616872	0.2827	-0.6139	0.248826		-0.47551	0.564165	0.0628019	-0.431894	-0.575005	0.515312	0.107383	0.615912	0.168537	-0.351098	0.0843373	-0.0939691	-0.593393	0.167493
-0.00466562	0.211752	0.147982	0.0766002	-0.602978	0.00662252	0.025641	-0.0536398	-0.207921	0.0238943	-0.644339	0.392315	0.0340371	-0.000848176		0.892824	0.451518	-0.219173	0.0807386	0.460446	0.198328	-0.638917	-0.530083	0.365263	-0.417015	-0.512157	0.493029	0.660536	0.32003
0.403509	-0.09215	-0.489517	-0.755889	0.0395158	-0.509795	-0.629464	0.206349	-0.495387	0.177592	-0.517709	0.252747	-0.676325	0.125926		-0.382041	0.383298	0.300823	-0.272191	0.536757	0.131604	-0.107468	0.691008	-0.0316972	-0.142789	0.3723	-0.0452261	0.286863	0.0972453
0.291925	-0.102362	-0.0595954	-0.139159	-0.371728	-0.136364	-0.480519	-0.393324	-0.543147	-0.481818	-0.705666	0.343434	-0.141631	0.0857143		-0.0220049	0.275043	-0.0809873	-0.0875455	-0.412639	0.562982	0.00603622	0.143118	0.143317	0.563236	0.330905	-0.194232	-0.639667	0.404517
0.0256411	0.197708	-0.0736452	-0.266094	0.256437	0.0702762	-0.446367	-0.0774859	-0.373494	0.0281612	-0.642857	0.466413	-0.385797	0.134912		-0.495174	0.0846457	0.0655738	-0.109547	-0.104874	0.310345	-0.266109	-0.362899	0.22449	0.465182	0.227658	0.175258	-0.697162	0.436259
0.206496	-0.514067	0.348811	0.130435	-0.145729	0.52776	-0.640288	0.0132414	-0.394495	0.785235	-0.58752	-0.251296	-0.625668	0.409924		0.193634	0.556678	-0.263116	-0.566069	0.107594	-0.518987	-0.326371	-0.0394202	-0.0548579	-0.196094	0.359204	0.649348	-0.315221	0.0701115
0.296296	-0.750547	0.116279	0.461538	-0.612121	-0.165397	0.426612	-0.334939	0.721911	-0.0770855	0.367837	0.00792284	-0.316089	-0.174228		-0.33222	0.153634	0.664993	0.123344	0.145853	-0.0919085	0.381	0.737524	-0.057538	-0.093578	0.0218553	-0.353191	0.15942	0.0332326
0.803229	0.555864	-0.167493	0.374131	0.459075	0.701493	-0.0678547	-0.0921502	-0.49345	-0.171415	-0.191102	0.191919	0.133286	0.561644		-0.218437	0.592299	-0.229496	-0.270188	-0.0405434	-0.252784	0.328237	0.704568	-0.039801	0.0371052	-0.13409	0.506173	0.124284	-0.332526
0.164587	-0.139518	-0.518694	0.252747	-0.240953	-0.243322	-0.508105	-0.0626186	-0.352751	-0.248097	-0.458239	-0.266409	-0.817768	-0.185372		-0.333464	-0.0727229	-0.279434	0.238834	-0.258278	0.711278	-0.408186	-0.184648	0.268157	0.121877	0.025641	-0.399517	0.407743	0.111459
0.240524	0.285125	-0.370492	-0.178782	-0.758822	-0.340694	-0.54023	-0.226994	0.114488	0.167493	-0.0538336	-0.262838	-0.414894	-0.309091		0.808462	0.00933238	-0.114655	0.254984	0.228769	0.713075	-0.261993	0.3342	-0.8151	-0.0944879	-0.0356394	-0.296296	0.261599	0.688796
-0.214307	-0.0932755	0.123158	-0.568627	-0.631042	-0.246459	-0.367339	-0.279133	-0.561644	0.0595954	-0.105145	0.274705	-0.738562	-0.025641		-0.0930086	-0.658511	-0.238877	-0.213793	0.142857	-0.210908	-0.0654206	-0.0451497	0.375187	0.290285	0.0172882	0.265806	-0.312112	0.688467
-0.359699	-0.390374	0.464789	-0.428571	-0.779614	-0.142098	-0.237861	0.147425	-0.0537134	0.200516	-0.524517	0.0678547	-0.1875	-0.232323		-0.141631	-0.678198	-0.246179	-0.284993	0.0624823	-0.171662	0.228902	0.202669	-0.139785	0.0123457	-0.117647	0.00377358	0.0968921	0.0475516
0.488345	0.510703	-0.433962	-0.113619	0.802426	-0.0303767	-0.209144	-0.258324	-0.121877	-0.145194	-0.0878214	-0.0505198	-0.108062	-0.355932		0.271777	-0.341991	0.20983	0.152472	-0.64743	0.0248498	0.188119	-0.156436	0.0120706	-0.486486	0.260264	0.150032	0.330724	-0.345615
-0.509025	0.283361	0.0843373	0.0135883	-0.0431373	-0.561668	-0.480519	0.429875	-0.35412	0.0169306	-0.245283	-0.0553019	-0.24154	0.0256748		0.630057	0.500721	-0.395248	0.341176	0.352424	0.421463	-0.169801	0.427549	0.250244	0.349486	0.252731	-0.196879	-0.192015	0.202532
-0.884449	-0.503268	-0.258278	-0.214191	0.711525	-0.488133	0.218583	-0.205246	-0.113838	-0.157847	-0.319265	0.00466563	-0.175258	0.335937		-0.29173	0.173722	-0.199678	0.212008	0.199334	0.254651	0.110943	0.368288	-0.018081	-0.146805	-0.0193251	-0.583974	-0.047619	0.00884956
0.494371	0.625351	-0.027027	0.130846	0.0451412	-0.171068	0.455347	0.0857143	0.265823	-0.0578512	-0.126365	0.027027	-0.169231	-0.158433		0.440159	-0.509434	0.371027	-0.0497389	-0.264003	-0.355932	0.313629	0.00272975	0.225488	0.356193	0.0487484	0.466502	-0.117993	0.50025
-0.278401	0.395248	-0.588643	0.0932868	-0.618209	-0.296641	0.110601	-0.366846	-0.0654206	-0.318996	-0.437838	-0.08299	-0.190361	0.0857143		0.751499	0.0189666	-0.690045	0.0437436	-0.460959	0.118347	-0.0458716	-0.238494	0.45924	0.150714	0.068319	-0.195875	0.0968921	0.0844233
0.502183	-0.770624	0.303462	-0.458003	-0.43067	0.69278	-0.298861	0.0857143	-0.255255	-0.301273	0.122895	0.500581	0.0821256	-0.260773		-0.34179	0.24971	-0.396059	-0.476446	0.317365	0.164345	-0.340451	0.415736	-0.193316	-0.463228	0.247236	-0.0221219	-0.128713	-0.18692
-0.0206611	-0.00238664	0.825547	-0.163946	-0.213759	-0.00925147	-0.407407	0.0377113	-0.310345	0.0750308	-0.1582	0.0838375	0.035533	0.120538		0.0921502	0.0590351	-0.314933	0.141939	0.247028	0.645233	-0.638595	0.344401	0.0698623	0.326187	0.378203	-0.113792	-0.6633	0.410269
-0.0141613	0.462957	-0.442158	0.645279	-0.468599	0.366906	-0.385797	-0.112347	0.195517	0.388275	-0.0825009	0.027027	0.025641	0.321459		0.65426	0.480519	0.129992	-0.352768	0.160221	0.474457	-0.422209	-0.286863	-0.540933	-0.025641	0.022291	0.027027	-0.0513834	0.327296
-0.889503	0.3137	0.22449	0.0287924	-0.112689	0.396795	-0.393173	-0.189886	-0.729222	0.178541	-0.488409	0.165644	0.280932	-0.112347		0.0710128	-0.760496	0.14062	-0.385013	0.355932	0.393385	-0.599198	0.219635	0.133882	-0.0191926	-0.614542	-0.129002	-0.0233012	0.606686
-0.294404	0.0456287	-0.122363	0.499364	-0.525547	0.0114068	-0.547511	-0.67382	0.291925	-0.00390407	-0.579169	0.076006	-0.67033	0.175258		-0.256861	0.699361	0.0596026	0.267918	0.529809	0.538238	-0.100431	-0.320192	0.141723	-0.0929347	-0.129343	-0.0222985	-0.404869	0.117647
-0.228087	-0.823256	0.035533	0.516807	-0.245902	0.322672	-0.460252	0.335192	-0.164345	0.347826	-0.420989	0.52	-0.0289449	0.475341		0.449275	-0.63017	0.375187	0.0667153	0.110466	-0.349977	-0.0648183	0.0346535	0.418062	-0.218777	0.306991	0.345651	-0.190601	0.0787359
-0.146982	0.511514	-0.441118	0.28294	-0.359165	0.165036	-0.361331	0.185442	-0.222402	0.235182	-0.446367	0.256198	-0.141631	0.0513834		-0.403649	-0.046892	0.579779	-0.231904	0.112097	0.193835	-0.536388	0.0534145	-0.0404978	0.255468	0.344828	0.310345	0.000641437	-0.129421
0.651376	-0.307354	0.121637	0.288136	-0.408343	0.458239	-0.586158	-0.185102	0.265178	-0.105425	-0.349112	0.391266	-0.0939122	0.494382		0.791956	-0.653495	-0.261003	-0.304878	0.0960378	0.0862486	0.149319	0.357143	-0.284931	0.21827	0.337209	-0.273885	0.270614	0.575699
-0.922892	-0.548787	0.296296	-0.495778	0.22449	0.376433	0.433381	-0.0526316	0.393324	0.0208955	-0.246136	-0.221492	-0.693593	0.684274		0.491828	0.602228	0.446303	-0.0329076	-0.0593467	-0.0932929	0.182385	-0.102362	-0.335071	0.129782	0.285753	0.297561	0.184308	-0.720588
-0.417249	0.767442	-0.00769889	0.665339	-0.661778	0.364527	0.416067	0.399727	-0.336942	-0.1528	-0.442576	-0.340515	0.187648	0.285714		-0.0861936	-0.374637	-0.485956	-0.025641	0.294188	0.184302	-0.213759	0.0694234	-0.128015	0.120031	-0.0404652	0.15779	0.347484	-0.370619
1	-0.025641	-0.186638	-0.280209	-0.357688	0.0788644	-0.840456	0.182222	-0.44393	-0.21447	-0.0432183	-0.182266	-0.910615	0.514321		0.702018	-0.281532	-0.311039	-0.0964826	0.244387	0.0718268	-0.0402854	-0.0163825	-0.128713	-0.0604545	0.18306	-0.165318	0.355932	0.625438
-0.527187	0.264603	0.0551351	-0.403141	0.525312	-0.498959	0.139735	-0.0401189	0.056524	-0.34357	-0.0622182	-0.159783	0.592969	-0.00618886		0.698993	-0.508328	-0.208083	0.0766002	-0.140518	-0.100715	0.384846	0.100286	-0.027027	0.36131	-0.042091	0.125285	-0.391549	0.0468441
0.233689	-0.629526	-0.192411	-0.155556	-0.126659	-0.0472494	0.0655738	0.489517	0.187975	0.0410959	0.109375	0.341176	-0.5622	-0.229072		0.841497	-0.618373	0.392069	-0.067089	-0.23749	0.50104	-0.123275	0.5069	-0.51567	0.0817264	-0.231778	0.451518	-0.459459	-0.608327
0.548787	0.657827	-0.660484	0.265212	0.113385	-0.0173802	-0.245427	0.223198	-0.252747	-0.24	-0.52	-0.349633	-0.957939	0.0405757		-0.171179	-0.72281	-0.348158	0.0735258	-0.389051	0.0932195	0.182796	0.701493	-0.164345	0.596639	-0.0678047	-0.435644	0.321429	-0.0175146
0.403509	0.564165	0.196207	0.272876	-0.627307	0.514731	-0.523533	0.710057	-0.524517	-0.0781671	0.284607	0.24812	0.296296	-0.129462		-0.195052	-0.644547	-0.39267	0.0437436	0.337209	0.0869338	0.28402	-0.0119466	0.401051	-0.244123	0.20381	0.0904049	0.144601	-0.615998
-0.537572	-0.23793	0.533101	0.56778	-0.598611	-0.128748	0.411658	-0.373071	-0.208942	0.525547	-0.0133333	0.277108	-0.0574853	0.352751		-0.296518	-0.274523	0.154163	-0.113191	0.410437	0.338677	-0.317794	0.362007	0.16336	0.57513	0.315953	0.652954	-0.23206	0.0697674
0.0861133	0.60815	-0.652174	0.57121	0.247366	-0.248699	0.0857495	0.193624	0.50404	-0.661721	0.507656	0.196249	0.00925147	0.0578158		-0.247398	0.461336	-0.225806	-0.145194	-0.149154	-0.19539	-0.0775047	0.169649	-0.333333	-0.293088	0.500938	-0.145758	0.199169	0.0122087
-0.368677	0.0622182	0.167883	0.346049	-0.320938	-0.197494	-0.494382	-0.15016	0.215067	0.0667153	0.435644	-0.0159831	-0.474886	0.399727		-0.301063	-0.657497	-0.117647	-0.196493	0.294729	0.267077	-0.324619	0.641143	-0.373212	-0.267425	0.532148	0.0143737	0.610196	0.517332
0.0921501	-0.535777	-0.59142	0.217465	-0.0373563	0.182778	-0.56226	-0.271233	-0.0198366	0.229584	0.530582	0.493029	-0.390244	0.0434012		0.6609	0.509025	-0.68757	-0.156481	0.0414972	0.483071	-0.298275	-0.376658	-0.479652	0.41714	-0.0398464	0.210065	0.0133892	-0.215458
0.0256411	0.415298	0.305483	0.0946502	0.432836	0.620853	0.460142	-0.190567	-0.329446	0.190723	0.0760476	-0.147132	-0.297913	-0.00663285		-0.0104621	-0.523914	0.025641	-0.393324	-0.305691	-0.227257	-0.507819	-0.259636	0.15924	-0.0271808	-0.607006	0.162128	-0.222779	0.465875
0.169344	0.393643	-0.344692	-0.0634173	0.493333	0.492559	-0.371471	-0.182796	-0.150032	0.284294	-0.0840094	0.3984	-0.133879	-0.510867		-0.419574	-0.16129	0.0908483	0.0730282	-0.448011	-0.0132996	0.221108	0.350401	0.070969	0.37141	0.616162	-0.0896445	-0.218183	-0.529986
0.440262	0.850187	-0.671554	0.0684465	0.111898	0.436323	0.564885	0.358666	-0.518072	0.0410959	-0.195804	-0.175904	-0.241307	0.257466		-0.242731	0.145939	-0.33121	0.265527	0.180698	0.00466563	0.0956444	-0.122611	-0.18907	0.185232	0.110147	0.496063	0.0578512	-0.212358
-0.260468	-0.178167	-0.542144	-0.025641	0.283493	-0.0349784	0.220513	0.212492	-0.250457	0.335651	-0.353919	0.2	-0.431414	-0.337209		-0.375901	0.0768332	-0.529905	-0.0578512	-0.336683	0.00181123	-0.206349	0.160839	-0.171095	0.157224	-0.277296	-0.125192	-0.0830235	-0.218347
0.36194	0.457995	-0.40246	-0.464789	-0.43899	-0.762365	-0.064395	-0.190248	-0.0454801	0.218968	-0.601667	0.140733	-0.0391722	-0.602787		-0.48359	0.676244	-0.567275	0.0307414	-0.0501535	-0.536628	-0.00213828	0.616841	0.169522	-0.000848176	-0.498854	-0.106988	-0.0520487	0.719689
-0.118766	0.0466102	0.203282	-0.471173	0.40625	-0.238938	0.0580974	-0.355932	-0.0114068	0.0191571	-0.449153	-0.025641	-0.284294	0.131134		0.162833	-0.462725	-0.517361	0.0950226	-0.399225	-0.358265	-0.202686	0.714818	-0.164562	0.348938	0.248807	0.738562	-0.266667	-0.243714
-0.583333	-0.40625	-0.784134	-0.63918	-0.67655	-0.768431	-0.0985915	-0.046892	0.46367	0.480519	-0.379845	0.288256	-0.512591	0.114007		0.678473	-0.954651	0.213689	-0.493333	-0.298137	0.317057	-0.249869	0.305316	-0.443367	0.394438	0.178314	0.721254	-0.0987039	0.231192
0.34104	-0.0647915	-0.240953	0.404052	-0.690522	-0.420188	0.234899	0.421769	-0.462309	-0.269231	0.0583788	-0.0109393	-0.0939122	0.449153		-0.201807	-0.298608	0.0215782	0.00114548	-0.366599	0.508294	-0.295372	0.320938	0.13864	0.151454	-0.326113	0.514731	-0.496337	0.0654206
-0.0128332	0.322034	0.603233	-0.0936591	0.574483	0.848161	-0.299416	-0.0956444	-0.29477	0.43662	0.0102605	-0.0587038	0.146572	0.193835		-0.350435	0.756493	-0.0103397	0.100943	-0.0703869	-0.0491408	0.440262	0.240273	-0.208942	0.113722	-0.0602056	0.231002	-0.667629	0.561644
0.441338	-0.642751	0.191489	0.449541	-0.0205371	0.219428	-0.156909	-0.097357	-0.764969	-0.409326	-0.341838	0.149632	0.217782	0.138057		0.771772	0.496384	0.151466	-0.025641	0.3825	0.0435606	-0.042229	-0.426612	0.295813	0.327731	-0.0114068	0.217082	-0.217413	-0.256437
0.367222	0.191102	-0.0382514	-0.0541728	-0.0596912	-0.715957	0.327434	0.0720321	-0.134674	0.233038	0.173368	-0.547619	-0.147947	0.0500864		-0.39059	0.536388	0.131167	0.6	-0.0936926	0.25113	0.326472	-0.275295	0.000324781	-0.0628691	0.42004	-0.0843373	-0.0431851	-0.598879
-0.182222	0.397993	0.359675	-0.642429	-0.69278	-0.320901	-0.563786	0.0114068	-0.296794	0.0966123	0.376481	-0.254902	-0.0322581	0.357143		-0.365157	-0.658776	0.494371	-0.116942	0.225205	0.157866	-0.147425	0.477	-0.0910357	0.0378007	-0.253353	-0.0215947	-0.594567	-0.174767
0.145194	0.462847	-0.701493	-0.311796	-0.57121	-0.66603	-0.423631	0.312932	-0.0769231	-0.136364	-0.263713	0.127922	-0.843699	-0.211618		-0.418638	0.488409	0.621574	-0.294907	-0.196402	0.262203	0.151641	0.65977	0.0365261	0.418323	0.379574	0.647864	0.740211	0.0780142
-0.139607	0.0243902	0.00151328	-0.335453	-0.334566	-0.310776	-0.335371	0.0857143	-0.268404	0.2827	-0.495755	0.264779	-0.246336	-0.0176446		-0.463896	-0.409076	-0.54516	0.0658271	-0.124811	0.451074	0.180374	0.433215	0.119691	0.292517	0.0885049	0.0463398	0.350496	0.294859
-0.389172	-0.32038	0.15016	-0.394996	-0.423268	0.0913838	-0.358816	0.319631	0.148381	-0.104566	-0.508105	-0.273885	-0.171095	0.164345		0.567744	-0.940377	-0.663207	-0.050975	-0.326772	0.468018	0.00776616	0.255636	0.00317094	0.542913	-0.575699	0.00704462	0.438528	-0.163848
-0.406263	0.463987	-0.566161	-0.538462	-0.392231	-0.246938	-0.305398	0.223085	-0.0347142	-0.0843373	-0.138337	0.285714	0.158672	-0.119105		0.025641	-0.682451	0.0921502	0.120538	0.575682	0.198081	0.0819419	0.425231	0.734266	0.1274	0.308556	-0.422258	-0.231693	0.64995
-0.350254	-0.0843373	0.134356	-0.33995	-0.288136	0.301188	-0.0738849	-0.348926	-0.221832	0.079334	-0.00529101	0.248826	-0.136691	0.0389395		-0.175707	0.784813	-0.0214763	0.0728729	-0.534565	0.298374	0.0536398	0.339581	0.114809	0.0138867	-0.0282903	-0.26876	0.034329	-0.556836
-0.0909091	0.261993	0.211618	-0.167883	-0.324771	-0.088	-0.245796	0.0454093	-0.294589	-0.119945	-0.342646	-0.16144	0.0108083	-0.0230041		-0.351677	0.341894	0.593235	0.0846755	0.0144928	0.471131	-0.516324	0.234188	-0.0820229	0.158027	0.0409491	0.408728	-0.388033	0.637676
-0.0654206	-0.280433	0.0852121	-0.207997	0.108284	-0.221492	-0.279088	-0.3723	-0.219753	0.0900099	0.111333	0.455939	-0.366061	0.642325		-0.363444	0.544246	0.438341	0.366768	-0.549448	0.466026	-0.143118	0.123153	-0.0372762	0.624327	0.273885	0.331019	-0.531327	0.723478
-0.358816	0.0332326	-0.378238	-0.227706	0.132966	-0.278182	0.152593	0.0428101	0.273885	0.339413	-0.250191	0.231785	-0.217082	0.611525		-0.219807	0.126984	-0.538248	-0.22449	0.197183	-0.572376	-0.300801	0.43451	0.245033	0.468018	0.373313	0.329609	-0.196954	0.0721649
-0.298246	-0.670607	-0.491917	0.0849195	0.273885	-0.0822898	-0.648952	0.192825	0.116279	0.148936	0.176142	0.275912	-0.182879	0.197101		0.321913	0.522201	-0.385663	-0.208771	-0.749858	-0.355932	0.145194	0.0212164	0.334445	0.43633	-0.319728	0.779216	0.467098	0.507307
-0.147425	0.244332	-0.480519	0.283407	-0.544715	0.421652	-0.099053	-0.350563	-0.357143	0.276486	-0.573548	0.0713101	-0.166667	0.383298		-0.230096	0.543272	-0.550309	0.134176	-0.411075	0.637188	0.254902	0.286116	-0.147026	0.283609	0.09301	0.682984	-0.429467	0.365751
0.199352	0.128015	0.20983	-0.211722	-0.437683	0.294947	-0.0453074	-0.155235	-0.00138696	-0.490313	0.14825	0.0946502	-0.453552	0.261993		-0.288136	0.46696	-0.714964	0.0353461	-0.353397	0.480519	0.492205	-0.398417	0.0794235	0.519012	0.136364	-0.321349	-0.0220049	-0.0853392
0.0526315	-0.60977	-0.480519	0.494017	-0.278156	0.725209	-0.221032	-0.616162	-0.326113	0.289502	-0.268293	-0.025641	-0.656539	0.676471		0.371555	-0.421593	0.812298	-0.213397	-0.423986	0.383097	-0.436259	-0.0743285	0.133379	0.0114068	-0.430962	0.374925	0.277567	0.130049
-0.310345	0.335548	-0.375677	-0.355932	-0.322672	0.0191571	-0.148936	-0.371823	-0.0697674	0.105145	0.00564392	0.225806	-0.388443	0.171299		0.699064	0.709929	-0.406214	-0.45401	0.0167953	-0.0902394	0.0703364	0.476138	0.152416	0.632571	-0.294404	0.296156	-0.224739	-0.105715
-0.544715	-0.116279	0.0940676	-0.146544	-0.275745	0.124839	-0.460021	0.245622	-0.0857143	-0.119105	-0.400171	0.198636	-0.388704	0.447468		0.753988	-0.428743	0.0431655	0.0379128	-0.144801	-0.0857495	0.293452	0.272727	0.273885	0.269488	-0.0488323	-0.0685104	-0.126365	-0.152893
0.12369	-0.0547264	-0.230582	-0.170106	-0.0114068	0.596123	-0.496063	-0.131167	0.047836	0.15911	-0.0243902	-0.222254	0.462701	0.104068		-0.415788	-0.472127	-0.105145	-0.0600707	-0.198264	0.494382	-0.00188324	0.449153	0.485493	0.701493	0.151203	-0.482289	0.0509244	0.455725
0.503268	0.175258	-0.529747	-0.507656	-0.446367	0.730849	0.025641	0.0139211	0.349484	0.253945	-0.117647	0.349112	-0.172414	-0.538027		-0.724672	-0.789361	-0.203528	0.0332326	0.298644	0.161948	0.402918	0.274705	-0.00122549	0.407407	-0.161654	0.32128	-0.470173	0.214307
0.474654	0.202814	-0.182222	0.244332	0.239509	0.203813	-0.355993	-0.248486	-0.0901375	-0.0425717	-0.496358	0.00466563	-0.414894	0.193624		-0.445519	-0.120922	0.644121	0.185442	-0.461467	0.203269	0.097576	0.252004	0.231782	0.0970329	-0.0801661	0.321106	0.456437	0.562982
0.446985	0.346049	-0.0971129	0.135632	-0.367946	-0.0553019	-0.599198	0.0332326	-0.110546	-0.177885	-0.254869	0.319742	0.0479461	0.0332326		-0.0544707	-0.0663879	-0.00222434	0.322034	0.00125156	-0.0188416	-0.0926167	-0.253798	0.381222	0.08857	0.188487	0.394788	0.37931	0.54014
-0.194969	0.528433	-0.621394	0.175258	-0.123548	0.0396427	-0.225806	0.0138161	-0.38258	0.410725	-0.255255	-0.285266	-0.165515	0.11931		0.476751	-0.459015	-0.154171	0.310345	0.0744366	-0.0168814	-0.147425	0.0363636	-0.346049	-0.0140173	0.296967	0.436546	0.610922	0.375444
0.252731	0.0701833	-0.338314	0.29099	-0.785235	0.151515	-0.206349	-0.025641	-0.199029	0.118359	-0.258278	0.420989	-0.150032	0.0751445		0.0965946	0.728682	-0.0391722	0.291785	0.345224	0.492265	-0.247398	0.0591649	-0.188661	-0.0541728	0.0411193	0.0416577	0.113333	0.295696
-0.656539	-0.250379	-0.154557	0.278476	-0.29593	0.0716247	-0.25983	-0.29519	-0.0499273	-0.358755	0.434288	0.368677	-0.0194265	-0.161765		-0.296375	-0.712846	-0.0107326	0.0389395	0.111319	-0.0446927	0.532479	0.534785	0.151689	0.399727	0.324852	0.258278	0.0911809	0.284294
-0.576892	0.149338	-0.359858	-0.180005	-0.148352	-0.228597	-0.212943	-0.155556	0.00168997	0.0374826	0.0652572	0.180791	0.0979228	-0.207764		-0.231693	-0.31214	0.368068	0.132791	0.660309	0.530852	0.0628359	0.388584	0.130877	0.391635	0.380959	0.288976	-0.0143737	-0.119061
0.269231	0.257773	-0.154557	-0.145194	-0.286494	-0.119691	-0.0208234	0.310345	-0.188504	-0.582418	-0.318048	0.24163	-0.387515	0.230096		-0.115517	0.451434	0.790735	-0.168573	-0.0153846	0.103413	-0.275996	0.10389	-0.160839	0.217082	-0.297189	0.514416	0.755365	-0.185758
0.324823	-0.176471	-0.480519	-0.111931	-0.0341127	0.156522	-0.0590642	0.121482	-0.137979	0.40246	-0.156909	0.158591	-0.0191571	0.0614525		0.67147	0.438339	0.111973	0.382997	0.165669	-0.201051	-0.207738	0.357688	0.141498	0.310345	0.102362	0.686482	0.508255	0.543359
-0.713115	0.390244	-0.476483	0.258278	0.173132	-0.0707204	0.102362	0.234801	0.206266	-0.0747271	-0.248826	0.00360144	-0.68059	0.460021		0.201539	-0.655967	0.141498	0.626667	-0.334332	0.128518	-0.114868	-0.360931	0.191889	0.211305	-0.0486875	-0.0853041	0.485547	0.316564
-0.258006	0.310345	0.19403	0.596882	0.486486	0.412511	0.620851	-0.104793	0.334087	0.246062	0.200179	-0.112637	0.201201	0.315811		0.202769	0.673054	-0.0745501	0.436391	0.616162	-0.178957	0.196262	-0.00135037	0.106501	-0.348982	0.555282	-0.00701083	-0.0394851	-0.188782
-0.175258	0.233038	-0.62665	0.283361	-0.113653	0.0608246	-0.0921426	0.0566702	-0.0442055	0.0431373	-0.270517	0.0922844	-0.0817264	0.25		-0.334966	0.391037	0.00171863	0.637661	-0.327731	0.266667	0.309751	-0.294534	-0.574195	0.132007	0.750547	-0.106501	0.13541	0.292517
0.0968921	0.378238	-0.20234	0.240596	-0.320242	0.566161	-0.4946	0.251647	-0.446367	-0.120585	0.593039	0.233283	-0.0800608	0.540036		0.0127253	-0.496277	0.114206	-0.0163426	0.494727	-0.0853392	-0.270995	-0.2315	0.630478	-0.128726	0.091662	-0.0107198	-0.123116	0.170616
-0.0568319	0.757709	0.263519	0.0604461	-0.0627362	-0.0968921	0.0420168	-0.271565	-0.274705	0.450382	0.0307132	0.0780142	-0.783394	0.120262		0.535906	-0.313537	-0.145729	0.0979563	0.00611284	0.0619981	0.518987	-0.232731	-0.461104	0.0544707	0.0612299	0.203211	-0.220345	0.0654206
-0.0382514	0.507524	-0.326113	0.364332	-0.0125392	0.263534	0.037874	0.0893761	-0.126365	-0.188487	-0.279434	0.50495	-0.00377358	0.499061		-0.0695003	0.714639	0.0572687	-0.598163	-0.114667	0.569293	0.344967	0.522461	-0.600887	0.231349	-0.221367	-0.07171	-0.211594	0.0555556
0.112347	1	-0.277471	-0.116279	-0.042838	0.246659	0.200179	0.146272	-0.322672	0.44942	-0.536059	0.381284	-0.258278	0.0857143		-0.482798	0.686239	-0.172198	-0.185499	-0.264311	-0.208929	-0.461445	0.0561091	-0.123768	0.187369	0.176471	0.389313	0.327434	0.511063
0.0439354	-0.164295	-0.405145	-0.133703	0.103022	0.163907	-0.114434	0.0745501	-0.0857143	-0.0759027	-0.296794	-6.84999e-16	0.0371243	0.235182		-0.354147	0.54295	0.410684	-0.2	-0.457266	-0.255474	0.0600707	-0.0694102	-0.422415	-0.42132	0.300613	-0.0928962	0.719275	0.36624
0.192077	0.00138693	-0.133233	-0.355932	0.202961	0.4939	-0.197708	0.566161	-0.243959	-0.0604396	-0.0389395	-0.206497	-0.235182	0.206349		0.136364	-0.699605	0.21139	-0.103694	0.088	0.779614	-0.175258	0.127971	0.53808	-0.458967	0.134725	0.597029	-0.273743	-0.0438024
-0.386294	0.466413	-0.474886	0.168471	0.296296	0.17618	-0.00466563	0.0721649	-0.310345	0.109063	0.0968921	0.0643275	0.0452261	0.319631		0.025641	-0.676355	0.382521	0.0929843	0.0596798	0.122325	-0.502402	-0.302262	-0.480519	0.725153	-0.0581843	-0.413832	0.305288	-0.111111
0.201201	-0.279901	0.071309	-0.507103	0.0148924	-0.0541728	-0.0410959	0.355423	-0.407407	0.255695	-0.0108655	0.0307414	-0.181669	0.287576		0.192854	-0.209482	-0.567615	-0.402296	-0.397112	-0.276215	-0.457526	0.651086	-0.586434	0.690977	0.400394	0.31304	0.135738	0.425482
-0.562634	-0.676616	-0.446367	0.435228	-0.230096	0.256873	-0.19197	0.0867159	-0.50495	0.186638	0.458003	0.426621	0.11937	0.138877		-0.355798	0.0130459	-0.00837989	0.582189	-0.377302	0.420199	-0.0444161	0.422652	0.233393	0.506358	-0.325329	0.104157	-0.431015	-0.322544
-0.0587349	0.0494541	-0.575197	-0.0731707	-0.0704225	0.0131317	-0.841741	0.244332	-0.132791	0.913669	-0.50104	-0.228744	-0.390244	0.0654206		0.837969	0.375677	-0.159785	0.279561	0.516722	0.364332	0.440589	0.625187	0.42132	-0.335453	-0.526881	0.064047	-0.0497238	-0.387746
-0.708384	-0.172529	-0.537572	-0.12337	-0.409781	0.322034	-0.608018	0.175258	-0.148574	-0.00746269	-0.446367	0.37287	-0.40396	0.591837		-0.354839	-0.327841	0.721354	0.493029	0.298536	-0.108742	0.124227	-0.186931	-0.553903	0.600981	-0.539205	0.363925	-0.0745501	0.0337235
-0.642325	0.411012	-0.620853	0.125529	-0.175258	-0.00719424	-0.321459	0.134912	-0.271375	-0.0559006	-0.0555556	0.282125	-0.177298	0.33121		-0.250585	0.480519	-0.245283	-0.503097	0.403274	-0.0667852	-0.539297	0.724403	-0.476202	0.601093	0.00925147	0.367704	-0.363057	0.393939
-0.000908224	0.00503781	0.0751907	0.167301	-0.423631	0.0121065	-0.298246	0.143607	-0.245902	0.188151	-0.142229	0.410725	-0.400567	-0.401051		0.00664189	0.470709	0.12337	0.591253	0.10657	-0.0849276	-0.509271	0.534294	-0.516324	-0.0736398	-0.529555	-0.0325318	-0.410824	0.0549321
-0.0195429	0.189687	-0.0699659	0.270517	-0.350254	0.532539	0.00951593	0.386253	-0.450382	-0.128748	-0.82771	0.108062	-0.564047	0.549003		-0.35347	0.431189	-0.0557129	0.243891	-0.480085	-0.0635538	-0.186823	0.178925	0.0671089	0.277868	-0.538698	0.383754	-0.471911	0.261993
0.165669	0.6324	-0.0208955	-0.0792952	-0.144631	0.165976	-0.353198	-0.185024	-1	0.0555556	-0.415632	-0.66603	-0.110226	-0.284818		0.239049	-0.454545	0.745506	0.160644	-0.323624	-0.285519	-0.30478	0.166081	-0.539127	0.175258	0.163718	-0.0668401	0.371645	0.103413
0.258653	0.0620748	-0.354012	0.347105	-0.43662	0.352751	-0.87891	0.139031	-0.310345	0.597806	-0.0451479	0.480519	0.116279	0.471199		-0.52	-0.343669	-0.0482759	-0.514178	-0.393114	-0.345188	-0.296013	-0.231008	-0.363575	0.335421	0.476425	0.113924	0.480775	0.347015
-0.750934	0.210281	-0.398948	0.278001	-0.326113	0.376045	-0.284294	0.0394654	-0.369369	0.252747	-0.39743	-0.264748	0.311301	-0.112347		-0.53908	0.616793	-0.0686953	-0.433145	0.300681	-0.46576	-0.499128	0.673796	-0.396962	0.291964	-0.5999	0.0340136	-0.646805	0.206349
0.0843373	-0.191489	-0.187053	-0.130186	0.202351	0.0121715	-0.155405	-0.22449	-0.55956	0.629941	-0.0671109	1	-0.0909091	0.326113		-0.416904	0.169837	-0.6292	-0.65954	-0.346622	0.45862	0.0805275	0.327787	0.173667	0.678715	-0.602246	0.0423059	-0.6624	0.108452
-0.132791	0.591042	-0.0105133	0.0930626	-0.357965	0.250312	0.0818608	0.718593	-0.221032	-0.459716	-0.25983	0.0766002	0.417625	0.194198		-0.0582278	0.399225	-0.132286	0.353865	0.284247	-0.410179	-0.0910148	0.205732	0.217144	0.775394	-0.468218	0.320463	-0.331703	0.0555556
-0.0205371	-0.228527	-0.244009	0.370239	-0.0940499	0.126603	0.184883	0.242685	0.10915	-1	0.149489	0.143294	-0.335096	0.273743		0.409326	0.531902	-0.357246	-0.204941	0.302008	0.0366886	0.400175	-0.0910617	-0.0607404	0.133916	-0.33	0.53186	-0.153513	-0.622748
-0.481865	-0.256117	-0.184652	-0.155556	-0.391084	0.242685	-0.945215	0.20966	-0.083684	0.396447	0.178782	0.467377	-0.194969	0.0410959		-0.377607	0.233038	0.301837	-0.380943	0.175525	-0.315044	-0.236097	-0.461109	0.167883	0.783394	-0.0402607	0.032322	-0.364562	0.0925877
-0.691141	-0.0153358	-0.076006	0.254369	-0.421769	-0.101027	-0.365079	0.357846	-0.931219	0.505919	-0.924953	0.491718	-0.286988	0.419659		-0.306213	-0.570024	0.502694	0.526262	-0.117647	0.539835	0.144405	-0.306563	0.102362	-0.261424	-0.46681	-0.492431	-0.428743	0.275659
-0.206992	-0.370547	0.00449543	0.189687	-0.385797	0.283407	-0.910615	-0.532513	-0.410407	0.533632	-0.293821	0.121155	-0.175258	0.36624		0.472629	-0.662837	0.591797	0.507937	0.025641	0.610217	-0.177698	-0.183312	-0.427858	-0.42004	-0.258173	0.559663	-0.345738	-0.219993
-0.394495	-0.181538	-0.156909	0.108753	-0.140422	0.0713101	-0.521399	0.242685	-0.928762	0.237636	-0.378238	-0.30618	-0.0857143	-0.025641		-0.31	0.647177	-0.634071	0.643586	0.0762332	0.613111	-0.447769	0.314581	-0.586672	-0.364708	0.0841134	-0.515628	-0.0536888	-0.509826
-0.0513834	-0.0449736	0.252236	0.480519	0.2694	0.204127	-0.906651	0.414166	-0.581493	0.0932868	0.0126582	0.53468	-0.690522	0.494382		-0.0419917	0.687389	-0.0892358	-0.20405	-0.182222	0.400659	-0.531027	0.0100413	0.00974229	0.283609	-0.0166305	0.711445	-0.485312	0.510703
-0.381284	-0.574326	-0.476606	0.215116	0.0707851	0.301875	-0.943182	0.602978	-1	0.539317	0.14561	0.488409	-0.253267	0.67033		-0.0713101	-0.663332	-0.0317305	0.247346	-0.456458	-0.305869	-0.175258	0.448035	0.256507	0.444083	0.182609	0.376433	0.0399121	0.261993
0.102362	-0.756468	-0.0740242	0.327296	-0.496413	0.0350195	-0.118943	0.275168	-0.777283	0.0971129	-0.352751	0.352751	0.0337641	0.432444		-0.285362	0.647926	-0.331765	-0.32181	-0.284591	-0.508794	-0.404517	-0.186729	-0.181152	0.339458	0.0189329	-0.323778	0.104294	0.480519
-0.537572	-0.770624	-0.208481	0.494767	-0.199782	0.493768	-0.319149	0.0277778	-0.117647	-0.151365	-0.414277	-0.853282	-0.214478	-0.446509		0.491511	0.566386	-0.219349	0.523741	0.649894	-0.334351	0.276055	-0.0832954	-0.238095	0.516756	-0.310345	0.679397	0.323785	-0.117498
0.563845	-0.88537	0.232731	0.706122	-0.252572	0.370349	-0.946092	-0.0320873	-0.847474	0.309172	-0.128713	-0.00374532	0.629761	-0.142098		-0.17746	-0.680672	0.030449	0.171806	0.36496	-0.0807257	0.242307	0.437838	0.162682	0.33295	-0.534835	-0.477793	-0.0694184	-0.680672
-0.52	0.690522	-0.212943	0.721254	-0.461538	0.394406	-0.549161	0.175258	-0.429703	0.577358	-0.899041	0.0243902	0.00291545	-0.0934394		-0.414184	0.497066	0.0845938	0.18092	0.110395	0.300365	-0.301446	0.466749	0.0700816	0.329181	-0.513224	0.261778	0.0852121	0.25983
-0.741355	0.597557	-0.119245	-0.0916335	-0.171484	0.370079	-0.321106	0.221764	-0.151515	0.457672	-0.204127	-0.0859729	-0.0756788	0.135937		0.0222066	-0.592275	0.112279	0.360842	-0.258459	0.0569943	-0.116374	0.472981	-0.0184975	0.385797	-0.225806	0.0247889	-0.522191	-0.320755
-0.0857143	-0.204188	-0.943182	-0.422749	0.198668	0.466282	-0.36255	0.370612	-0.211594	0.922179	0.0170241	0.288136	-0.456869	-0.102801		-0.326113	0.563291	-0.237388	0.715792	0.361482	0.418285	-0.407407	-0.0182371	-0.203187	0.314775	-0.155296	0.488596	-0.532588	-0.268178
0.154225	-0.025641	-0.411012	0.22722	-0.448095	-0.331494	0.0578512	0.25711	-0.388704	-0.0124873	-0.132791	0.20966	0.26346	-0.0145341		0.499493	0.475066	-0.211341	0.168047	-0.00514981	0.315682	-0.198397	-0.34402	-0.151515	0.482854	-0.416532	0.707258	0.160604	0.170013
-0.113653	0.398104	-0.840743	0.623842	-0.379179	-0.157025	0.0921502	-0.300813	-0.358133	-0.0158411	-0.277471	0.327296	-0.848389	0.0884634		-0.253442	0.457227	-0.536636	-0.450733	0.0690423	0.678116	-0.0444607	-0.441568	0.208684	0.0126693	-0.0343055	0.108062	-0.235651	-0.656532
0.495327	-0.861818	-0.0636132	0.369369	-0.240136	0.137432	-0.278846	-0.148575	-0.108062	0.0857143	-0.0926518	-0.396825	-0.441118	0.5		-0.551685	0.668029	-0.443682	-0.114627	0.309393	0.318101	-0.154557	0.286825	-0.445928	0.255468	0.0968921	0.289456	0.30515	-0.34357
-0.616051	-0.00198626	-0.339581	0.314503	-0.387286	0.112321	0.0852121	0.214162	-0.20966	-0.025641	-0.888528	0.150032	0.187648	0.0567297		-0.419827	-0.510299	0.0222759	0.556659	0.603088	0.118302	-0.578758	-0.318772	-0.23703	-0.0882605	0.577417	-0.137574	-0.461538	0.33099
0.489362	-0.544607	-0.52362	0.224108	-0.123768	-1	0.0163857	0.338142	0.0336341	-0.037303	0.234257	0.0332326	-0.243891	0.0434012		-0.277771	0.365376	0.31787	0.436956	0.353242	-0.303291	0.385021	0.440433	0.236568	0.522355	-0.0245298	-0.0747271	-0.191102	-0.240524
-0.0429276	0.271376	-0.0766002	-0.188487	-0.100263	0.237209	-0.047619	0.620853	0.13242	0.513274	0.0115607	-0.337209	-1	-0.269231		0.765378	0.658715	-0.273269	0.547304	-0.51489	-0.304073	0.624073	0.642325	0.7751	-0.147583	-0.358133	-0.286013	-0.487137	0.142758
-0.577762	-0.45305	-0.0542823	0.103734	-0.223644	0.263252	-0.242003	0.0304026	-0.235182	-0.0314843	-0.100431	0.042229	0.160455	0.0513834		-0.215626	0.566932	0.140298	-0.0961983	-0.562018	-0.310433	-0.00884956	0.474468	-0.00833651	0.458239	0.263158	-0.0421521	-0.451958	-0.381246
0.244263	0.19236	-0.673867	-0.27515	0.167883	0.219635	-0.242685	0.175258	-0.383754	0.0299572	-0.0654206	-0.0626186	-0.56778	0.455244		-0.29393	-0.609386	0.0285208	-0.186161	-0.378851	0.716563	-0.196526	0.412064	-0.188953	-0.228527	-0.175258	0.393589	0.545817	-0.521739
-0.609811	0.492265	-0.342427	0.474627	0.29285	0.138203	-0.106502	0.473299	-0.175258	0.175258	-0.114007	0.258278	-0.866071	-0.0640394		0.113954	0.135589	0.329543	0.484375	0.447813	0.304426	-0.410376	0.0982071	0.301032	0.633545	0.454725	0.757392	-0.656418	-0.102362
-0.75447	-0.127196	-0.130435	0.54023	0.0821256	-0.13242	-0.347737	0.0410959	0.114091	-0.28402	-0.42446	-0.207646	-0.155567	0.310345		-0.343284	-0.291248	-0.533968	0.252308	-0.442628	0.308467	-0.0933269	0.446367	0.218107	0.33222	0.162614	0.483037	-0.133678	-0.344538
-0.0038525	0.720543	-0.26868	0.285125	-0.150175	-0.331431	-0.631902	0.0697674	-0.240506	0.352751	-0.447253	0.613283	0.494617	0.407407		-0.117647	-0.126849	-0.0253304	0.181669	0.283689	-0.0569247	-0.304592	-0.0107198	0.111813	-0.288878	-0.211863	-0.0620793	0.447014	0.165478
0.673094	-0.516382	-0.69278	0.306323	-0.154796	0.0618762	-0.215686	-0.0399121	-0.151515	0.115717	0.088	0.530201	-0.294404	0.15958		0.619301	0.726711	-0.268764	0.374963	-0.425231	0.485057	0.0458601	-0.0205417	0.151586	-0.37882	-0.317865	0.530968	0.32918	0.253945
-0.640288	0.358622	-0.769563	0.0379128	0.328622	-0.12181	-0.547511	-0.31951	-0.565634	0.0766976	-0.125285	-0.230308	-0.0780142	0.188781		0.0781671	0.697445	-0.504332	-0.114809	-0.633011	-0.0865742	0.283019	0.0252393	-0.0820229	0.297561	0.0126582	0.74212	-0.10859	0.315947
0.0588235	-0.154809	-0.696714	-0.339413	-0.544715	-0.00890208	-0.342646	0.372057	-0.280111	0.346457	0.231954	0.218968	0.505065	0.235182		0.674307	-0.501888	-0.0178571	0.452055	-0.0124146	-0.025641	0.0119466	-0.319092	-0.15736	0.214002	-0.57468	0.317124	-0.516143	-0.129589
0.461596	0.369722	-0.275618	0.304012	-0.300999	0.118766	0.265378	-0.373992	0.370166	-0.260653	-0.364332	-0.0893246	0.0995261	-0.415929		-0.027027	-0.783307	-0.261616	0.600887	-0.136569	0.286154	-0.0982659	-0.396989	-0.0930086	0.366104	-0.532016	-0.168433	-0.379784	-0.203008
-0.596913	-0.00523564	0.102362	0.680928	0.382114	0.333333	-0.297961	-0.190189	-0.164008	0.406546	-0.407407	0.151515	-0.583333	0.103734		0.488187	0.0763547	0.476096	-0.458248	0.398143	0.156909	-0.0966123	-0.108742	0.15016	0.252927	0.151122	-0.0581506	-0.112008	-0.0939691
-0.120879	-0.183458	-0.514731	-0.216069	-0.527187	0.298861	0.11215	0.340357	0.196903	-0.025641	0.0307652	0.117647	-0.255602	0.264268		-0.235468	-0.363636	0.0596522	0.217316	-0.472868	0.584923	-0.345133	-0.442184	2.73219e-16	0.45891	-0.336643	0.458158	-0.0336694	0.493029
0.211296	-0.0441386	-0.0832259	0.20298	0.563218	0.293408	-0.174142	0.0469738	-0.216259	-0.0541728	-0.220183	0.0318772	-0.417652	0.472958		0.540222	-0.17427	-0.767082	0.617687	-0.1582	0.486649	-0.281741	0.503321	-0.493791	0.596391	-0.151515	-0.155556	0.00459087	-0.0452261
0.280932	0.344899	-0.0188249	-0.0700057	-0.454783	0.057187	-0.431593	-0.560331	-0.322867	-0.161687	0.0488677	0.800499	-0.121311	0.103535		0.537499	-0.360025	0.270443	0.374586	-0.395248	0.0674565	-0.177609	0.306205	-0.67704	-0.225696	0.0690423	0.157316	-0.688889	-0.194232
-0.488098	-0.649903	0.0342541	-0.102362	0.0687304	0.191841	-0.255408	-0.185185	-0.134328	0.613655	0.355932	0.286154	0.0414972	0.480519		-0.575881	0.563138	0.516866	0.421161	-0.225806	0.605211	0.025641	-0.441758	-0.150474	-0.348315	0.535366	0.666168	-0.461737	0.175258
-0.231693	-0.0987887	-0.0343195	0.165644	-0.154064	2.87856e-16	-0.183257	0.232296	-0.392639	-0.126761	-0.220183	0.305973	0.408681	0.0602056		0.122959	0.657399	0.0492333	-0.305948	-0.184753	-0.545494	-0.602505	0.0924326	-0.164345	0.353327	-0.0753288	-0.307492	-0.397504	0.649348
-0.754895	0.168174	-0.0143737	-0.188487	-0.372815	0.0143737	-0.270951	0.0208234	0.345365	-0.486486	-0.146552	-0.45305	-0.652174	0.150175		0.540353	-0.710494	-0.491761	-0.105765	-0.00954346	0.677999	-0.516698	0.135632	0.025641	0.027027	0.116279	-0.347733	-0.727534	-0.353191
0.371708	-0.455149	-0.110336	0.544873	-0.306538	-0.025641	-0.149543	-0.0171845	-0.00263852	0.0609137	0.15016	0.0932868	0.0726122	0.210191		-0.526565	-0.338481	-0.565157	-0.37577	-0.343434	0.0836449	-0.432059	0.0688652	0.295016	0.0696565	-0.667171	-0.105181	-0.0155739	0.506173
0.390374	-0.419321	0.173913	0.537572	-0.487179	-0.025641	-0.0564448	-0.181933	-0.378238	-0.0945427	-0.42734	0.381284	-0.184136	0.510703		-0.407407	0.422037	0.266916	-0.15016	0.10705	0.027027	0.396825	-0.206497	0.025641	0.173098	-0.0996785	0.171393	0.564885	-0.399517
0.27031	-0.236253	-0.0382514	-0.0731707	-0.352751	0.19685	-0.343926	0.119843	-0.171652	-0.432091	-0.0322581	-0.0645376	0.00869565	-0.146398		0.520975	-0.513118	-0.100853	0.6	-0.210191	0.205197	0.0857495	0.168174	-0.0012781	-0.167883	-0.0633923	0.609121	0.484746	-0.296296
0.509434	-0.300533	0.364903	0.425	-0.220056	0.310345	-0.404869	-0.143847	-0.377517	0.297189	-0.316017	0.460907	-0.1875	0.140422		-0.283117	-0.579779	0.836649	-0.088	0.360412	0.721311	-0.0292524	-0.397233	-0.36367	0.41339	-0.0882817	-0.672196	0.299804	0.265806
-0.725449	0.0435606	-0.287383	0.0346535	-0.56701	0.554828	-0.576037	0.649123	-0.553903	0.29468	-0.405589	0.286988	0.117954	0.29992		0.248699	0.499805	-0.238592	-0.303462	-0.509025	0.318778	0.126291	0.243499	0.182796	0.155677	-0.132389	-0.48029	-0.146431	0.00377358
-0.653808	-0.210307	-0.276486	0.105524	-0.141631	0.113222	-0.133478	0.379626	-0.134229	0.595062	-0.191638	-0.138284	0.396825	0.0140208		0.701341	0.412005	-0.310345	0.123116	-0.48272	-0.0496105	0.0209487	0.00308187	-0.326393	0.476498	-0.0268774	-0.565714	-0.0355078	0.150032
0.341863	0.187771	-0.211487	-0.162325	-0.564734	0.177176	-0.522136	0.575699	-0.372057	0.398201	-0.553903	-0.0452261	-0.0701833	0.0100825		0.359612	0.635361	-0.292035	-0.139159	0.0427163	0.555749	-0.0530787	0.0935252	-0.443038	0.0946502	-0.234535	0.318463	-0.212902	-0.196879
-0.733368	0.353198	0.180263	0.445769	0.34431	0.560117	-0.34488	0.326683	0.208333	0.197708	-0.17873	0.619048	-0.323137	-0.575837		0.00183262	0.57204	0.474654	-0.105425	-0.407407	0.310345	-0.417091	-0.287654	-0.499519	0.235618	0.134177	0.486782	-0.446515	-0.583974
-0.188876	-0.608247	-0.0344119	0.144066	0.186421	0.0253725	0.213936	-0.0643368	-0.270517	-0.365534	-0.323234	-0.0378243	-0.131752	-0.0427651		-0.00458231	-0.265229	0.0052356	0.68757	-0.236209	-0.262409	-0.493671	-0.712846	-0.820751	-0.156542	-0.531637	-0.417744	-0.0971129	0.466502
-0.315811	-0.211839	-0.196249	-0.0450532	-0.231192	0.581626	-0.0788644	0.392539	0.401889	0.314153	-0.255468	0.145299	-0.600213	-0.0326282		0.33829	-0.795805	0.501948	0.67906	0.226023	0.615912	-0.0578158	0.289176	0.100148	0.167916	-0.261183	0.166874	0.285783	-0.195875
0.76667	-0.437632	-0.826635	0.0396427	-0.0932868	0.310345	0.0578512	0.143519	-0.428571	0.312574	0.578947	-0.32346	-0.272727	-0.025641		0.407572	-0.151232	0.230308	-0.213793	0.567958	-0.0170978	-0.124443	0.28598	0.183062	0.0494541	-0.695321	0.278097	0.492205	-0.0221219
0.415531	-0.382114	-0.0109546	0.214941	-0.193668	0.21545	-0.195318	0.0790483	0.0768221	0.161572	-0.590094	0.407407	-0.12426	0.330289		-0.0800608	-0.641791	0.831683	-0.0991379	-0.29646	-0.136847	-0.318926	-0.22824	-0.0813008	0.225806	-0.67394	0.0887125	0.359913	-0.113792
0.0904255	0.212492	0.146441	-0.627373	-0.254869	0.691553	-0.36255	0.696106	-0.369597	0.84466	-0.12708	-0.0538506	-0.142391	0.38258		-0.0622182	-0.568044	0.241379	0.530201	0.330724	-0.0714651	-0.116778	-0.0810811	-0.00599401	0.263977	-0.75453	-0.518987	-0.272653	0.027027
0.0708263	0.31832	-0.259198	0.233972	-0.641919	0.50104	-0.0178571	0.194385	-0.352751	0.57492	-0.471831	0.420989	-0.15878	-0.245621		-0.414634	-0.36915	-0.687752	0.267431	-0.29593	0.130049	0.0578512	0.0984811	-0.752997	-0.431723	-0.410002	0.498065	0.384235	-0.129002
-0.0220049	0.251362	-0.357399	0.387515	-0.528433	0.26803	-0.218437	0.369855	0.0594876	0.310345	0.226152	0.718593	-0.00884956	-0.171766		0.498681	0.451105	-0.322034	-0.407797	-0.217082	0.369475	-0.884184	-0.337447	-0.406081	-0.213793	0.218354	0.543835	-0.424866	-0.0222985
-0.328189	0.433962	-0.00466563	-0.441923	-0.244864	0.117647	0.436378	0.453552	-0.0602056	0.110745	-0.443423	0.0792227	-0.620853	-0.197183		-0.42695	0.264188	-0.325843	0.161583	0.36229	-0.294688	-0.00884956	-0.153196	-0.466559	0.134674	0.314106	-0.227163	-0.606073	0.345651
-0.122974	0.643766	-0.171095	0.6139	-0.658806	-0.0341226	-0.364641	-0.251113	-0.317877	0.0332326	0.102362	-0.0335083	-0.0220049	0.316801		0.347079	-0.176657	-0.047619	0.218139	0.0107198	-0.318792	-0.108062	0.699973	-0.0800442	-0.0368664	-0.00110693	-0.596936	-0.572764	0.310345
0.189399	-0.000324781	0.262136	-0.237388	0.279621	-0.0407767	0.42132	0.576101	-0.286988	0.146272	0.449275	0.0930086	-0.230769	-0.375401		0.512126	0.640288	0.243451	-0.461287	0.265983	0.649371	-0.0647343	-0.144371	-0.276344	0.260151	0.588681	-0.52146	-0.306621	-0.273885
-0.509101	0.0458716	-0.104116	0.00529101	-0.130435	-0.388654	-0.0876565	-0.108742	-0.24163	0.54993	-0.327731	0.470968	0.14087	0.244915		0.513859	-0.462058	-0.373268	-0.27031	-0.0661812	0.0874152	0.0433728	0.492868	-0.135969	-0.187648	-0.345494	0.685436	0.259757	0.297561
-0.645669	0.138577	-0.561644	-0.401051	-0.217538	0.0939122	-0.0690144	0.0442055	-0.353487	0.609121	0.0132996	0.238155	-0.165036	-0.279133		0.42132	-0.0771625	-0.511014	-0.025641	-0.287243	0.0593732	-0.06311	-0.351747	-0.292339	0.0618762	-0.716563	-0.247525	0.0854575	0.15779
-0.0178571	-0.712846	-0.477374	0.131134	0.336371	-0.133796	-0.274705	-0.0326282	-0.162641	0.170548	0.113106	0.0677853	0.179856	-0.626452		-0.480519	-0.476664	-0.109063	-0.199169	-0.310345	-0.487501	0.112858	0.0386428	-0.4	0.00632763	-0.473497	0.643859	-0.305703	-0.165318
0.110506	-0.0731707	0.449275	-0.157184	0.0949165	-0.412509	-0.188504	-0.254902	-0.372057	0.51567	-0.487357	-0.387856	-0.112971	0.0442055		-0.310345	0.700549	0.500387	0.345677	0.425804	0.469613	-0.597806	0.444444	-0.353372	-0.314952	-0.219922	-0.412483	0.133783	0.125285
-0.287915	-0.766871	-0.580008	0.495174	0.342828	0.333892	0.0111524	0.434352	0.0945978	0.52682	-0.290303	-0.16144	-0.123768	-0.243028		-0.324709	0.0864279	0.213793	0.423077	-0.367436	0.392478	-0.210689	0.599198	-0.0166305	-0.0523908	0.0731707	0.285443	-0.401364	0.451518
-0.263116	0.191102	0.717039	0.274705	-0.24383	0.383754	0.339343	-0.157635	-0.139785	0.356251	-0.0835031	0.500403	0.41633	0.171095		-0.407407	-0.520975	0.543739	-0.327434	-0.0845586	0.272916	0.428571	0.744995	-0.0448625	0.0133968	0.0483401	0.57204	-0.511246	-0.435644
0.398143	0.117647	0.122112	0.437628	-0.00662252	0.00845728	-0.536388	0.248826	-0.153634	-0.106813	-0.340357	0.233038	-0.149978	-0.0494204		0.425804	0.283117	0.556851	0.16645	-0.462084	-0.453674	-0.773692	0.265832	0.110506	-0.196493	0.183816	0.568532	-0.237313	0.0904049
-0.480519	0.407407	-0.229217	0.20966	-0.514091	0.446367	-0.457437	0.229371	-0.0263421	-0.454999	-0.701493	0.322672	0.047836	0.0592334		-0.521581	-0.248699	-0.348035	0.240136	0.0691282	-0.318108	-0.0195122	-0.00347264	-0.474343	0.0607879	0.100076	0.0922844	-0.542563	0.652954
-0.128713	0.225806	-0.235772	0.265212	-0.199549	0.35471	0.133186	0.106796	-0.150547	0.24347	-0.183673	0.0857143	-0.354839	0.0857143		-0.697199	-0.701341	-0.585134	-0.37639	-0.100431	0.0126227	-0.52684		0.174968	-0.149645	-0.533352	0.61996	-0.458661	-0.145758
-0.13066	-0.474654	0.334961	0.485806	-0.335938	0.466515	-0.343753	0.0592334	0.283019	-0.636205	-0.139124	0.169231	-0.105145	0.11421		-0.625668	-0.359612	0.348039	0.455906	-0.310345	-0.0414972	-0.238018		-0.333019	-0.13526	-0.589008	0.394568	-0.048228	0.0143737
-0.0610329	0.210191	0.052272	0.139785	0.369973	0.0286624	-0.31674	-0.0993826	-0.175258	0.133316	-0.405145	0.197708	-0.639408	0.0588235		0.456921	-0.00183262	-0.310345	0.521255	-0.313305	0.328076	-0.219829		-0.396518	0.00198469	0.133379		-0.432871	0.210065
0.0727632	0.00138696	-0.603318	-0.158433	0.046892	0.771055	0.0568455	-0.394324	0.254902	-0.208333	-0.00326313	0.607251	-0.213759	0.405923		-0.0550588	0.00458231	-0.637188	-0.101912	0.117614	-0.136364	0.0566518		-0.103535	0.29099	0.507386		0.031771	0.162128
0.341372	0.145502	-0.64576	0.487544	0.0117563	-0.140704	0.329053	-0.025641	-0.0984811	0.185111	0.102362	0.272517	-0.129512	0.12651		-0.55594	-0.33829	0.732604	-0.0698096	-0.478758	0.248826	-0.6633		0.259008	-0.126437	-0.100966		-0.548205	-0.0896445
-0.873239	-0.83711	0.44229	0.319265	-0.367163	0.452824	-0.233038	0.441118	0.15942	-0.550054	-0.218968	0.326113	-0.620853	0.0787359		-0.355404	-0.407572	-0.0137429	0.594046	-0.403208	-0.219512	0.0655738		0.00851414	-0.0792509	-0.494171		-0.468305	0.496063
-0.625906	0.55516	-0.595778	-0.0835811	-0.613111	0.53186	-0.186911	-0.216755	0.0616201	-0.651376	0.399138	-0.976815	-0.36255	0.256782		0.750547	0.0800608	0.473137	-0.0795848	-0.343706	0.234387	-0.295289		0.0757109	-0.325967	-0.557878		0.259752	-0.125192
-0.0116372	0.403409	-0.000446229	0.583333	-0.125958	0.69278	-0.461221	0.433962	-0.306621	0.259107	0.309091	-0.0483401	-0.33222	-0.070672		-0.352751	0.0622182	-0.506608	0.0117146	-0.426523	-0.106616	-0.563121		0.298893	0.327821	0.439296		0.3078	-0.106988
-0.0196493	0.607772	-0.166667	0.51353	-0.076006	0.404302	-0.332527	0.352751	0.182209	0.0662177	-0.154848	-0.0690423	-0.48693	-0.213583		0.752577	0.414634	-0.111111	0.750195	-0.319036	0.53159	-0.407407		0.0745935	0.709849	-0.513382		-0.0434012	0.738562
0.355932	0.0734463	-0.110256	0.047619	-0.0032075	0.0669546	0.047836	0.418468	0.117389	-0.400742	-0.463987	0.0534145	-0.24347	-0.05		0.570401	-0.498681	-0.113653	0.65419	-0.261993	-0.24775	0.176851		-0.537572	-0.0206186	-0.693487		-0.541172	0.721254
-0.42029	0.132791	-0.165085	-0.167883	-0.0609137	0.0794678	-0.407407	0.293821	-0.099053	-0.309091	-0.59479	-0.775846	-0.358816	0.357375		0.159796	0.42695	0.716418	0.414894	-0.336146	-0.377049	-0.403296			0.0434012	-0.238464		-0.0549321	0.514731
-0.214478	0.314804	-0.43514	0.36255	-0.294947	0.263977	-0.400922	0.165432	0.183624	0.184652	-0.388159	0.755528	-0.225806	0.0227744		0.738382	-0.347079	-0.293194	-0.385681	0.239702	-0.331658	-0.228588			0.343434	-0.716312		-0.360244	0.231002
0.309091	0.484902	-0.454899	0.185889	-0.27314	0.312993	0.01002	0.132791	-0.0546854	0.340357	0.162791	-0.541116	0.332526	-0.0148924		-0.413659	-0.512126	-0.185177	0.252463	0.438664	-0.313998	-0.175258			-0.259064	-0.00293255		-0.218968	0.217082
0.325444	-0.42132	0.301837	0.340159	-0.106502	-0.122112	0.0173114	-0.00564392	-0.762523	0.208942	0.27239	-0.367837	-0.643766	-0.0710128		-0.415018	-0.513859	-0.370019	-0.467645	-0.632154	-0.0425717	-0.222265			-0.21976	-0.695829		0.0833333	-0.0843373
-0.106029	0.218004	-0.623932	0.330289	-0.302465	0.369369	-0.324182	-0.0526316	-0.440433	0.855335	-0.33295	0.446367	-0.352751	-0.145194		0.712846	-0.42132	-0.288352	0.718593	-0.488575	0.103917				0.343434	0.053451		-0.0731354	-0.0215947
-0.33121	0.0909091	-0.0369181	0.177247	-0.62872	-0.000324781	-0.189979	0.0392892	-0.248826	0.0974729	-0.0745501	0.438537	-0.462847	-0.381601		-0.357901	0.480519	-0.477778	0.0763547	0.760487	0.615912					-0.650506		-0.0437436	0.647864
-0.369369	0.388028	0.141498	0.168326	-0.393391	-0.112347	-0.0190236	0.463987	-0.294947	0.0429275	-1	0.12893	-0.274804	-0.130313		-0.524517	0.310345	0.0550113	0.134912	-0.375297	0.0304026					-0.545689		-0.506088	0.0463398
-0.273471	0.274971	-0.100811	0.0896677	0.0986267	0.408025	0.195159	0.27314	-0.488575	-0.119105	-0.108062	0.26803	-0.0316261	0.0900099		0.0483401	0.324709	0.594359	-0.484163	-0.0850097	0.442775					0.0703364		0.0393258	0.00704462
0.369716	-0.117562	-0.076006	0.128713	-0.326683	-0.206497	-0.193624	0.315641	-0.00466563	0.0332326	-0.233972	0.117647	-0.105145	0.383754		0.180972	0.407407	0.219512	0.152763	0.203282	-0.0866406					-0.642153		-0.371841	-0.422258
0.390374	-0.414601	-0.157024	-0.0175146	-0.480519	-0.48702	-0.378238	-0.0337641	0.25085	0.418468	-0.369369	0.701493	0.178095	0.583333		-0.378043	-0.425804	0.302752	0.234564	-0.0996785	0.0213412					0.208333		-0.491621	-0.26876
0.0144928	-0.506494	0.204696	0.216724	-0.380584	0.43067	-0.213759	0.106502	0.105072	-0.281211	-0.146431	0.252747	-0.474733	0.418323		0.708928	0.521581	0.278345	0.682677	0.285914	0.012699					0.647094		-0.436463	0.408728
0.0853392	0.216075	-0.0654206	-0.238264	0.0871148	-0.637108	-0.470468	0.461538	-0.590698	0.320938	-0.213157	-0.38673	-0.232297	-0.0346828		-0.515751	0.697199		0.221239	0.0874739	0.279279					0.631725		-0.263497	0.331019
-0.819038	0.228363	-0.350401	-0.139327	-0.320463	-0.0992786	0.355932	0.49743	-0.183391	0.207806	-0.303212	0.675174	-0.178681	-0.283019		0.389208	0.625668			0.277359	0.578474							0.025641	0.329609
-0.232023	0.273743	-0.45698	0.574536	-0.349675	0.376704	-0.805616	0.296794	-0.205118	0.230299	-0.0564448	-0.676721	-0.317794	0.0654206		-0.351351	-0.456921				0.643567							-0.258278	0.779216
-0.277778	-0.665332	-0.198798	0.314503	0.111349	0.151515	-0.428394	0.228172	0.0843373	0.31832	-0.301405	0.400922	0.136364	-0.680672		0.518987	0.0550588				-0.191489							-0.118176	0.682984
-0.492447	0.121966	-0.0885417	0.141631	0.21447	0.0835031	-0.21559	0.417539	-0.220642	0.076006	-0.108062	-0.0896445	0.130773	0.166667		0.453687	0.55594				0.0907152							-0.650488	-0.321349
0.39731	0.355581	0.301984	0.0857143	-0.208481	-0.317762	-0.139785	-0.127869	0.170086	0.275912	-0.42566	0.660194	-0.267697	0.280899		0.697843	0.355404				0.714522							0.248699	0.374925
-0.0231684	0.0442055	0.607348	-0.244598	-0.611307	0.604672	-0.210729	0.326854	0.564273	0.730849	0.0578512	0.155075	-0.137724	0.0118704		0.588448	-0.750547				-0.447302							0.257567	0.296156
-0.164345	-0.370645	0.146876	-0.432836	0.499493	0.257773	-0.363495	-0.25238	-0.0140558	0.047619	-0.0857143	0.5747	-0.173623	-0.0401188			0.352751				0.674263							-0.0996785	-0.0685104
-0.0877356	-0.144695	-0.0580956	-0.191489	0.268403	0.320463	-0.116698	0.0178571	-0.676244	-0.206897	-0.305973	0.352751	-0.222139	0.583333			-0.752577											0.286127	-0.482289
0.499801	-0.66725	-0.220183	0.141961	-0.43662	0.50104	-0.213547	0.620853	-0.248394	-0.124092	-0.134199	-0.184181	-0.220183	-0.478353			-0.570401											-0.221261	0.32128
0.485678	0.402057	-0.813737	0.123956	-0.152083	0.385797	0.00977199	0.32762	-0.0729888	0.0109546	0.527531	0.680341	-0.0284524	-0.182796			-0.159796											-0.647696	0.321106
-0.246907	0.74212	-0.373381	0.0654206	-0.0835031	0.192825	0.0290055	-0.275399	-0.511063	-0.260023	-0.42234	0.4351	-0.354405	-0.0206685			-0.738382											0.165541	0.394788
-0.151515	0.552042	-0.15958	0.138285	-0.626784	0.0281612	-0.375	0.195378	-0.221032	0.279561	0.0744986	-0.862568	0.0626185	0.508323			0.413659											-0.153835	0.436546
0.482112	0.000333222	-0.0900099	0.0304026	-0.599724	-0.159705	-0.943938	-0.213288	0.197183	0.0458716	-0.363925	0.763713	-0.200516	0.352751			0.415018											-0.389051	0.0416577
-0.192825	0.555864	0.158433	0.440646	0.132128	0.606414	0.0650018	-0.241908	-0.161466	0.0200256	-0.327957	0.197708	-0.114006	-0.268403			-0.712846											-0.348812	0.258278
-0.0442055	-0.0448497	0.145194	0.310345	-0.276185	-0.226892	-0.601269	0.219428	-0.0191571	0.62936	-0.431748	0.0538336	-0.330289	0.213759			0.357901											0.215067	0.288976
-0.0682047	0.194198	-0.458239	0.231693	-0.0435051	-0.0949165	-0.380584	-0.0655738	-0.0639365	0.30038	-0.316239	0.0958691	-0.38258	0.496063			0.524517											0.0111524	0.514416
0.780709	-0.449275	0.196865	0.372354	-0.210739	0.0924464	-0.423122	0.489212	0.216495	-0.213793	0.170836	0.451518	-0.557032	0.330289			-0.0483401											-0.480519	0.686482
-0.0469099	0.848843	-0.259259	0.117647	-0.446367	0.0234957	0.167883	0.0934556	-0.422008	0.366906	-0.887535	-0.355932	-0.514281	0.730185			-0.180972											-0.608455	-0.0853041
0.311891	0.027027	0.0159363	-0.153846	-0.079334	-0.204361	0.0380513	-0.256437	0.279621	0.137292	-0.0154712	-0.415385	-0.15499	0.360882			0.378043											0.322314	-0.00701083
0.0169492	0.0555556	0.15016	0.533301	0.025641	0.698201	-0.206349	-0.34357	-0.467705	-0.309091	-0.274705	-0.211296	0.112945	0.0485253			-0.708928											0.284993	-0.106501
-0.0225455	0.6292	-0.0646182	-0.0430434	-0.258407	0.259259	-0.430315	0.131134	-0.111111	0.563708	0.167883	-0.117469	-0.605211	0.146431			0.515751											0.165049	-0.0107198
0.562751	-0.85749	-0.220025	0.323973	0.015645	0.13522	0.264016	0.288136	0.143626	0.129804	-0.152083	-0.500938	0.257549	0.247104			-0.389208											0.308238	0.203211
-0.23158	0.738562	-0.235182	-0.465068	-0.855335	0.088017	-0.193316	0.207532	0.624588	0.883382	-0.433962	-0.433641	-0.338843	-0.290323			0.351351											-0.256966	-0.07171
-0.640607	-0.236476	-0.563132	-0.0772627	-0.59847	0.120797	0.283493	0.322672	-0.377092	0.775701	0.355932	-0.0791038	-0.112159	-0.0256411			-0.518987											0.40826	0.389313
0.208865	0.480519	-0.169231	0.149543	-0.488313	0.0431373	-0.141631	0.269061	-0.135632	0.185889	0.366937	-0.206497	-0.435677	-0.275477			-0.453687											0.100831	-0.0928962
0.630094	0.64986	-0.355581	-0.0687304	0.0119466	0.461253	-0.299724	0.194969	0.230769	-0.131167	-0.3843	0.395248	-0.175258	0.457575			-0.697843											-0.379349	0.597029
-0.471199	0.242685	0.279757	0.52	0.0349784	-0.139983	-0.121482	-0.443067	-0.283253	0.500099	-0.0318772	0.175258	-0.537572	-0.22449			-0.588448											-0.496288	-0.413832
-0.150474	0.660484	-0.401164	0.339207	-0.395248	0.480519	-0.185232	0.409924	-0.4507	-0.237249	0.025641	-0.116279	-0.0350195	0.301545														0.193345	0.31304
-0.110336	0.173418	-0.673545	-0.0206186	-0.283253	0.160896	0.170732	0.0789881	-0.0817264	-0.22449	0.34357	-0.174398	-0.0654206	0.180436														-0.275319	0.104157
-0.559882	-0.0756155	0.127869	0.259546	-0.608466	0.669251	0.0700057	-0.136364	-0.600286	0.102354	0.112637	0.0798376	-0.533372	0.0128331														0.00810081	0.064047
0.0991379	-0.215067	-0.0166305	-0.524224	-0.673173	0.0615369	0.0955331	0.23799	-0.13409	-0.0541728	-0.184652	-0.683992	-0.597198	0.183517														-0.264839	0.363925
0.0541728	-0.190301	-0.397776	0.691781	-0.569403	0.234011	0.253508	0.0256748	0.0541728	0.407407	-0.518336	0.132791	-0.274804	0.694563														-0.547511	0.367704
-0.000908265	0.00954346	-0.307148	-0.0172414	-0.0258216	-0.559536	-0.566161	0.00293255	-0.541089	-0.212536	-0.248826	-0.189886	-0.0316261	0.0128332														-0.192825	-0.0325318
-0.142435	0.398376	-0.100431	0.616183	-0.466515	0.146812	-0.00733221	0.169377	0.124227	-0.0514135	-0.353487	-0.187026	-0.105145	0.444445														-0.0143737	0.383754
0.243028	0.669508	-0.351464	0.545256	0.0901468	0.00406504	-0.0351165	0.109875	-0.0802676	0.419087	-0.451518	0.1875	0.178095	0.261033														0.0361576	-0.0668401
0.255908	0.388704	0.0132996	-0.0849176	-0.175258	0.154557	-0.357143	0.0973065	-0.462431	0.235932	0.429311	0.257655	-0.474733	0.154013														0.433486	0.113924
-0.407407	0.0527256	-0.308313	-0.111111	0.239375	0.268982	-0.185031	0.125055	0.120239	0.393173	-0.108062	0.703962	-0.232297	0.127801														-0.0198366	0.0340136
0.15016	0.059761	0.249688	-0.025641	-0.649202	-0.227076	-0.152971	-0.273885	0.0191083	0.0174404	-0.797297	0.187982	-0.178681	-0.184461														0.411892	0.0423059
-0.0713101	-0.309091	0.0851599	0.310345	-0.692308	-0.538995	-0.128065	0.00293255	0.100448	-0.15454	-0.0745501	0.471831	-0.317794	0.38258														0.269443	-0.4019
-0.222439	0.655337	-0.291785	0.374389	0.312793	0.256693	-0.00529101	0.532258	-0.0299572	0.327787	-0.622332	-0.184883	0.136364	0.54993														0.29002	0.179117
0.12609	0.0324921	-0.650109	0.394292	0.244046	0.117647	-0.307907	-0.0178926	-0.00466563	0.242285	0.270983	-0.116279	0.130773	-0.124738														0.00559378	0.128423
0.275054	-0.0921502	-0.289895	0.101193	-0.0208955	-0.0126582	0.00907029	-0.333333	0.217547	0.227104	-0.233972	0.249546	-0.267697	0.200395														0.515828	-0.430327
-0.284294	-0.288056	-0.116113	0.200385	-0.269311	0.183673	0.147982	0.207594	-0.3984	-0.248097	0.325444	0.168915	-0.137724	-0.131344														-0.422008	0.00707519
-0.0757319	0.443845	0.211153	-0.320851	-0.10703	0.279561	0.185714	0.123424	0.365091	0.209996	-0.0248963	0.360882	-0.173623	-0.382114														0.132802	-0.324078
0.176471	0.672956	-0.620853	0.463987	0.100338	-0.105593	0.0645376	-0.117469	-0.124088	-0.170635	-0.51882	0.0668248	-0.222139	-0.0770856														0.0821256	0.575905
-0.175258	-0.454545	-0.433962	0.194499	-0.0222586	-0.314952	-0.0369181	0.327296	-0.186968	-0.0305633	-0.521137	-0.315953	-0.220183	0.0350195														-0.217963	0.730969
-0.0364695	-0.484163	-0.0766002	0.370349	-0.0925877	0.37379	-0.0878214	0.259971	-0.123478	0.138577	-0.678715	-0.206497	-0.0284524	0.300801														0.682603	0.421391
0.809955	-0.220957	-0.11592	0.0578158	-0.203899	0.253945	-0.143932	0.491917	-0.528647	0.223485	-0.627561	0.170013	-0.354405	0.1875														-0.244594	-0.479875
-0.223161	-0.611545	-0.403208	0.352111	0.0995261	-0.141498	-0.57672	-0.291925	0.276857	0.180199	0.0405509	-0.221887	0.0626185	0.196628														0.300108	0.228957
-0.438339	-0.497326	-0.361564	0.242685	-0.124005	0.175258	-0.724296	-0.669086	-0.0624117	0.238808	0.025641	0.452824	-0.200516	0.0736452														-0.162128	-0.324417
-0.121353	0.0932868	0.409499	0.35412	-0.179746	0.155405	0.184461	-0.0766355	0.0340371	-0.138024	-0.0809628	-0.300108	-0.114006	-0.355932														0.0860058	-0.326043
-0.274571	-0.0968921	0.0397112	-0.672817	-0.46506	-0.0499211	-0.1406	0.0900099	0.51044	0.122363	-0.417249	0.23913	-0.330289	0.177987														0.453444	0.306076
-0.154171	-0.0360481	-0.144038	0.194198	0.0714286	-0.0460251	0.47912	-0.0438024	0.518987	0.160967	-0.298663	0.160305	-0.38258	-0.139814														-0.274327	0.039777
0.184308	-0.22449	-0.336231	0.516324	-0.179762	0.633887	-0.261993	0.182738	-0.499805	0.193433	-0.365079	-0.101075	-0.557032	0.314029														0.19403	-0.155349
-0.194334	0.291527	-0.0598994	0.313604	-0.59142	0.243792	-0.180275	-0.257742	-0.674576	0.387286	0.167883	0.342266	-0.514281	-0.05														-0.0458716	0.762772
-0.00851277	0.385797	-0.288365	0.175258	-0.369578	-0.568182	-0.124726	0.335006	-0.363	-0.0382868	-0.288136	0.364103	-0.15499	0.151515														-0.231481	0.307257
-0.678715	0.445432	0.10998	-0.101853	0.0676732	0.29593	0.00909642	-0.248215	-0.0966123	-0.0739364	-0.235182	-0.282198	0.112945	-0.210567														-0.20693	0.225806
-0.208306	0.587416	-0.20839	-0.025641	-0.166351	-0.172277	0.167883	-0.0550113	-0.617986	0.0692641	-0.208481	-0.163745	-0.605211	-0.21447														-0.167493	-1.5027e-16
-0.0105133	-0.025641	0.381222	0.0857143	0.203282	0.24163	0.482808	0.0448625	-0.661495	0.027027	0.113106	0.134328	0.257549	-0.389492														-0.294863	-0.0614589
-0.167493	-0.204188	0.0780447	0.0332326	0.0841697	0.539978	0.105072	-0.0131452	0.194605	0.119731	0.193634	0.272344	-0.338843	0.50322														-0.469613	0.215327
0.821036	0.543835	-0.234801	-0.133379	0.136731	0.0481341	-0.108062	0.0156454	-0.133996	-0.33995	-0.354528	0.177814	-0.112159	0.234535														-0.0654206	-0.530804
0.157847	0.04	-0.117647	0.151515	0.187187	-0.0204624	-0.220183	-0.00746269	0.0375343	-0.0690423	0.415385	0.614685	-0.435677	0.228172														-0.459098	0.284557
0.244844	-0.22449	0.0341805	-0.466459	-0.145449	-0.280932	-0.139421	0.0125392	-0.027027	-0.0541728	0.220027	0.662625	-0.175258	-0.299385														-0.300946	-0.0311011
0.0340371	0.396074	-0.870466	0.740515	-0.11144	0.175258	-0.357143	0.151843	0.211073	0.426621	-0.0578158	0.154557	-0.537572	-0.389492														0.462552	-0.152714
0.726619	-0.436911	-0.0598558	-0.143626	-0.0787359	0.505228	-0.301545	0.245578	-0.264834	0.284664	-0.0806389	0.38162	-0.0350195	0.20966														0.380176	0.245427
-0.750195	-0.108742	-0.146431	0.238256	-0.12265	-0.410567	0.208333	0.483704	-0.0654206	0.0667153	-0.00747791	0.161174	-0.0654206	0.156909														0.457696	0.503839
-0.406469	0.452824	0.0690423	0.21556	-0.408772	0.181669	-0.462216	0.0809628	-0.0442055	-0.0576636	0.22449	0.276486	-0.533372	0.152686														-0.228588	-0.270983
-0.227738	-0.423863	0.0632144	0.417652	0.439114	0.0486565	-0.214478	0.088017	-0.110546	-0.591914	-0.645414	-0.355932	-0.597198	0.367408														0.302883	0.784134
0.136364	-0.0448497	-0.0114068	0.294947	-0.117647	0.571556	-0.732842	-0.025641	-0.167849	-0.132966	-0.480519	-0.120585	-0.0834	0.195462														-0.171923	0.623461
0.455125	0.114868	-0.0748379	0.545455	0.0810811	0.0618213	-0.519012	0.0281612	-0.384966	0.44393	-0.0783928	-0.104793	-0.117647	0.20362														0.000791487	0.0491164
-0.147425	-0.439528	0.0312862	0.0128332	-0.313857	0.0800175	-0.38258	-0.102362	0.0991379	0.0610329	-0.167235	-0.121342	0.182796	0.127029														0.0338983	0.171855
-0.253582	0.2	-0.243105	0.107254	-0.453552	-0.0109393	-0.319265	0.0602056	-0.343434	0.463549	0.22449	0.213759	0.348039	0.294404														-0.0325668	-0.162895
0.0690423	-0.025641	0.40287	0.583333	-0.833234	-0.046892	-0.279561	0.0393596	-0.53186	0.019975	0.57186	0.385659	-0.617408	-0.152659														-0.310345	0.539412
-0.0123457	0.0614525	0.00834369	-0.169202	0.218994	-0.0203528	-0.60815	0.0345627	-0.383754	0.0445026	0.284404	0.433962	-0.265951	-0.175647														0.283216	-0.181733
0.00390407	-0.120823	-0.0448625	-0.170732	0.387097	0.469295	0.3002	0.342646	0.601972	0.233635	-0.649123	-0.0444874	-0.0128332	0.443553														-0.140658	0.0575224
-0.401241	-0.559278	0.0921502	-0.317365	-0.368288	-0.0115607	0.103213	0.150292	0.0488677	0.0740242	-0.301188	0.0229312	-0.0178572	0.161174														0.402003	-0.212806
-0.578497	-0.0526316	0.0900083	0.491917	0.0113595	-0.025641	0.181832	0.0521327	-0.620853	-0.535777	0.181165	0.198423	-0.141631	0.189687														-0.503839	-0.0298395
0.127349	0.532909	0.00436681	-0.109072	-0.202814	0.0627362	-0.163722	-0.118972	-0.480519	0.0713101	0.227357	0.00293255	-0.446367	0.490196														-0.151515	-0.539008
-0.490196	0.0595954	-0.421978	0.136415	0.131665	0.285714	-0.250498	0.42734	-0.578115	0.423631	0.242884	-0.0444874	0.0670291	0.305973														0.21576	0.570248
0.218583	0.665971	-0.433962	0.258278	-0.376433	0.197238	-0.137725	-0.0379747	0.155205	-0.34129	0.136364	0.0665405	-0.104335	0.0578159														-0.482078	-0.656706
0.0351562	0.379845	0.466318	-0.00502513	-0.546364	0.0316742	0.430692	0.106796	0.235632	-0.229562	-0.310345	0.357143	-0.301188	-0.173913														-0.372057	-0.652194
-0.488174	0.381072	-0.606686	-0.110421	0.361029	-0.596581	-0.236813	-0.106303	-0.234581	0.0996785	-0.261993	-0.025641	-0.231693	0.543684														0.111111	-0.514173
0.025641	0.224108	-0.617021	-0.120239	0.142621	-0.258653	-0.154557	-0.200616	0.451314	0.145729	-0.52	0.633758	-0.47403	0.120106														0.24	0.668936
-0.00610998	0.27544	0.0218409	-0.148765	-0.0369181	0.135896	-0.250312	0.461538	-0.671554	0.228856	-0.294484	0.139505	-0.652174	0.348298														0.00238663	0.355948
0.733021	0.144216	-0.31674	0.511936	0.22449	0.00884956	-0.498767	-0.22449	0.0515135	0.222864	-0.545885	-0.385681	-0.373494	-0.244598														0.175647	-0.644962
0.426612	0.50104	0.200414	0.277709	0.0936591	0.119185	-0.407407	0.343092	-0.138013	-0.12532	-0.40246	-0.15924	-0.221658	-0.025641														-0.0281612	0.222139
-0.369369	0.243354	0.221071	0.241307	-0.175258	0.302979	-0.167235	-0.256669	-0.0874525	0.000446229	0.217547	-0.015544	0.102362	0.314029														0.175957	-0.512979
-0.498208	0.67033	-0.194198	0.196714	-0.387111	-0.0806452	-0.0850973	-0.0494204	-0.297561	0.673736	0.0690423	0.239716	-0.2827	-0.0568454														-0.00153396	0.000839295
-0.318612	0.3843	-0.621826	0.128015	-0.225806	0.175258	-0.0299572	0.146722	-0.206349	0.239871	-0.190361		0.104377	0.681416														-0.0419162	-0.0395545
-0.659212	0.0769231	-0.373494	0.231693	-0.480519	0.399116	-0.310345	-0.181376	-0.290709	-0.465657	-0.269061		0.121054	0.427549														-0.379274	0.398212
0.430219	-0.436094	-0.435818	0.0745501	-0.480519	0.0969652	-0.312792	-0.284607	0.0644461	0.135087	-0.579717		0.038961	-0.366494														-0.0556814	-0.168769
0.79159	0.165831	-0.318463	0.547511	-0.539595	-0.0770855	0.182964	-0.0921502	0.245722	0.120879	0.0617284		-0.0654206	0.408107														0.0912016	0.659309
-0.414894	0.551116	-0.37155	0.126365	-0.515396	-0.317365	-0.310345	-0.159115	-0.24833	-0.0144092	-0.51915		-0.242065	0.67033														0.157548	-0.264189
0.088	-0.31951	0.0936591	0.155405	0.323155	-0.153967	-0.467377	0.609121	-0.620853	0.251815	-0.221913		0.32918	0.53977														-0.113246	0.521399
-0.528736	-0.253071	0.00436681	-0.143847	-0.124839	-0.0731707	-0.33121	0.410205	-0.708384	0.0398464	-0.196056		-0.248826	0.908676														-0.185031	-0.344409
-0.0857143	0.548589	0.540154	0.252463	-0.270517	0.59479	-0.364103	-0.025641	-0.0332326	-0.0185522	-0.214478		-0.0318772	-0.805128														-0.36549	0.543835
-0.412916	-0.246459	-0.179179	0.0332326	0.143915	0.214668	0.215427	0.095675	0.130552	0.250851	-0.310345		-0.147947	0.156909														0.238616	-0.216288
-0.377123	-0.404841	-0.0555556	0.394627	-0.631902	-0.0399633	-0.762818	-0.383204	-0.588424	0.0527256	-0.349962		-0.139006	0.0105133														-0.258278	-0.724851
-0.0485252	-0.136364	-0.227627	-0.176471	-0.231693	0.0842734	-0.360382	0.170479	-0.129343	0.166667	-0.65437		-0.431593	0.319265														0.165144	0.0754258
-0.195378	-0.025641	-0.553903	-0.349036	0.112251	-0.269557	-0.333333	0.0243902	-0.327296	-0.0526316	-0.463987		-0.494585	0.221261														0.0660841	0.516324
-0.407407	-0.0381601	0.29285	0.206349	0.364118	0.203346	-0.284294	0.0430622	-0.600887	-0.405302	-0.143519		-0.157895	-0.292492														-0.256658	-0.27603
-0.217645	-0.435338	-0.346049	0.310345	-0.528273	0.16955	0.133703	0.539797	0.0655738	-0.464789	-0.467741		0.147132	-0.246753														0.660989	-0.0395158
0.330724	0.171948	-0.819894	0.175258	-0.432624	0.35085	-0.409781	-0.0208589	-0.141631	-0.00869565	-0.0918224		-0.125529	-0.122112														-0.283154	0.00293255
0.328622	0.39472	-0.260815	-0.564648	-0.430502	0.308078	-0.541947	-0.214254	-0.0585975	0.088017	-0.057187		-0.235932	0.647318														0.22449	0.293408
0.273885	0.738562	0.00869565	-0.340278	-0.0458716	-0.163946	-0.423631	0.190601	-0.403759	0.183026	-0.459603		-0.327296	0.240356														-0.465875	0.500823
0.299385	0.0134786	-0.484622	0.471976	-0.832285	0.227738	-0.407407	0.489912	-0.73233	0.202814	0.133963		0.155556	-0.234257														-0.0299572	0.290894
-0.0607262	-0.431981	-0.244701	-0.238616	0.236476	-0.00977199	-0.427296	-0.680672	-0.0775047		-0.55836		-0.467377	0.620853														-0.350116	0.253079
-0.366906	-0.753717	-0.36255	-0.201201	0.316672	-0.273126	0.27031	0.281278	-0.329051		-0.104116		-0.348643	-0.153967														-0.727273	-0.51342
-0.0143737	0.0114068	0.339819	0.6483	0.530027	-0.546478	-0.399727	-0.0849709	0.301273		-0.0231684		0.116279	0.0857143														-0.352751	0.0182594
0.547619	-0.113106	0.131301	-0.0321716	-0.293194	-0.0176446	-0.492587	-0.154163	-0.480519		-0.299674		-0.134912	0.128353														0.385681	0.664562
0.610403	-0.189675	-0.441118	0.38258	0.126974	0.461107	-0.417407	0.310345	-0.0350195		-0.00725983		-0.293821	0.00621119														-0.456119	-0.216016
-0.0481341	-0.675214	0.124498	-0.12337	-0.228784	0.390244	-0.134912	-0.0109393	-0.272018		-0.464365		0.0447274	0.277709														-0.323452	0.479162
-0.125381	0.0612002	-0.52	-0.143485	-0.317333	0.0230364	0.0351563	0.20738	-0.6139		0.336371		-0.0227743	-0.427957														-0.798199	0.341176
0.0752688	-0.304348	-0.310345	0.105863	-0.489517	0.542144	-0.748805	-0.371158	-0.357143		-0.745583		-0.0369181	0.643766														-0.127119	0.396115
0.424242	0.189687	-0.0614525	0.143813	-0.722759	-0.219941	-0.300999	-0.281841	-0.269847		-0.411765		-0.393643	0.01675														-0.237861	0.564015
0.256259	0.0220049	-0.0857143	-0.230769	-0.0410959	-0.0492333	-0.454756	0.671339	-0.0490798		0.355932		0.0478361	0.427549														0.41833	0.781848
-0.330289	0.0348156	0.209118	-0.0300429	-0.60829	-0.443254	-0.352447	-0.134409	-0.420989		-0.0555556		-0.347015	0.709724														0.186233	0.591985
-0.0410959	-0.025641	-0.25113	-0.368898	0.230563	0.257912	-0.0393596	0.0751445	-0.327296		-0.524173		-0.438158	-0.167883														0.0863582	0.681333
-0.326113	-0.251448	-0.474886	-0.0363837	0.23143	0.272427	-0.380584	0.244332	-0.414894		0.102362		-0.165644	0.520958														-0.21133	-0.0952381
-0.731903	0.164816	-0.378238	0.0602056	-0.285419	0.407407	0.025641	-0.318681	0.194605		0.355932		0.261167	0.35085														0.557503	-0.342669
0.0591472	0.0745501	-0.267585	-0.194288	-0.281525	-0.104566	-0.0143737	0.432509	-0.332527		0.726619		-0.0713101	0.161572														0.787709	-0.094591
0.363503	-0.0859107	-0.433962	0.206349	-0.432807	0.00807382	-0.379581	-0.323798	-0.537572		-0.131134		-0.397625	0.407407														-0.548205	0.420243
-0.388128	-0.329053	0.104377	0.489517	-0.52	0.114303	-0.407407	0.333933	-0.369369		-0.114555		-0.891403	0.597806														0.384144	-0.112347
-0.216199	0.402737	-0.000908265	0.0285859	-0.314029	-0.208333	-0.365079	0.0898317	0.220129		-0.175258		-0.335651	0.023569														-0.855335	0.236813
-0.494382	-0.13242	0.478353	0.125789	-0.479167	-0.102362	-0.545455	-0.0640394	0.544607		-0.18907		0.098305	0.0410959														-0.269868	-0.167883
-0.489777	-0.141498	-0.548205	-0.385681	-0.868852	0.325843	0.24039	0.0752243	-0.109161		-0.496063		-0.0252394	0.537572														0.250601	0.451827
0.725644		0.200312	0.445704	-0.60017	0.113778	-0.229584	0.310345	0.237708		-0.0453635		-0.215686	0.244078														0.377368	0.529975
-0.184652		-0.15958	-0.046892	-0.0822785	0.214478	0.24886	-0.0668925	-0.28566				-0.128147	-0.114664														0.168929	-0.543032
-0.20966		-0.357143	-0.0753532	0.532704	0.341651	-0.383754	-0.0986267	0.175755				-0.817768	0.212288														-0.161174	-0.491791
0.0747271		-0.451518	0.0421012	0.196375	0.0591434	-0.0160428	0.179379	-0.461846				0.0175146	0.37287														-0.157706	0.398652
0.303462		-0.0932868		-0.29477	0.0908376	-0.545885	0.596639	-0.580656				0.0376776	0.0210372														-0.192825	-0.145194
-0.284294		0.129944		-0.0982659	0.137234	-0.189233	0.218968	0.617676				-0.53186	-0.121495														-0.457227	0.437115
-0.104478		-0.539317		0.328401		-0.839825	0.722922	-0.130775				-0.374131	0.0677412														-0.583333	0.24679
0.355932		0.0867294		-0.457075		-0.18771	-0.170544	-0.335295				-0.306358	0.152624														-0.537572	0.609953
-0.626459		-0.355581		0.186161		-0.636765	0.361084	0.0563973				-0.375444	-0.136364														0.025641	0.310345
-0.0857143		-0.235182		-0.150892		0.0500744	0.622851	0.025641				0.116279	0.168174														0.0916335	-0.486486
0.300108		-0.248826		0.281269		-0.151515	-0.294778	-0.458988				0.273885	0.132791														0.128107	0.370079
0.20229		-0.0440756		0.358616		-0.535141	0.144123	-0.215116				-0.00884955	0.0458715														0.638095	0.100772
0.167883		-0.0299572		-0.156909		-0.416532	0.199221	-0.0773667				-0.161572	0.701493														-0.50104	0.180521
-0.0130736		0.386092		0.0445667		0.288056	0.242199	-0.551641				-0.294404	0.60912														-0.515818	0.361331
0.0386152		-0.313426		-0.493029		-0.6633		0.640379				0.270983	-0.0655737														-0.179982	-0.525659
0.0617284		0.025641		-0.0971129		-0.122974		-0.00293255				-0.287979	0.287952														-0.602978	-0.0634173
0.298536		0.386414		0.146679		-0.148936		0.14061				-0.117647	-0.239509														-0.677419	0.598866
-0.711712		-0.0518813		-0.30479		-0.470468		-0.507524				-0.538461	-0.216437														-0.33643	-0.105012
		0.208657		0.136364		-0.168471		-0.437115				0.0571737	0.175258														-0.293194	0.12426
		-0.303212		0.205788		-0.701493		-0.443038				-0.0310078	0.259259														0.573034	-0.340515
		0.309091		0.452581		-0.300232		-0.383097				-0.465875	0.117647														0.025641	0.462084
		0.424242		-0.384966		-0.0654206		0.456129				-0.418821	0.727273														-0.18907	0.114303
		-0.0857143		0.848907		0.174398		-0.0578158				-0.414029	0.44451														-0.0892044	0.638917
		-0.659671		-0.328671		-0.0132738		0.204188				-0.0256748	0.197708														0.552322	-0.275935
		0.189024		-0.42246		0.0236462		0.244477				-0.103817	-0.185257														0.121233	0.49345
		0.256895		-0.129343		-0.431414		-0.191986				0.371158	0.206816														-0.600085	-0.282756
		0.25708		-0.631336		0.624872						-0.252464	0.345755														0.492073	-0.0750507
		-0.371362		-0.605404								-0.281153	0.168745														-0.441118	-0.352886
		-0.225806		-0.32762								-0.167493	0.120718														-0.270517	0.359699
		-0.495082		0.142857								-0.126067	0.160305														-0.471199	-0.294254
		-0.610538		0.0926457								-0.112773	-0.0111524														0.590203	0.732379
		-0.225806		0.447298								-0.541446	0.638604														0.496393	-0.40826
		0.018011		0.0731707								0.120823	0.590094														0.244123	0.589582
		-0.487742										-0.468411	0.411012														0.0564334	-0.420673
		-0.166961										-0.0766003	0.497505														0.252731	0.429803
		-0.564165										0.120585	0.196526														0.213793	-0.53702
		-0.155955										-0.391549	0.719828														0.706042	-0.134697
		-0.218968										-0.0963527	0.131349														-0.0893379	-0.602185
		-0.132791										0.127349	0.144801														-0.631256	0.0243902
		-0.701493										-0.175258	-0.193345														-0.15878	0.30343
		0.167883										-0.314218	-0.200616														-0.0114068	-0.180477
		0.317365										-0.0627362	0.264188														-0.118324	0.376258
		-0.248826										-0.389683	0.117647														0.0588171	-0.532498
		0.492718										-0.522269	-0.584963														0.616366	-0.676098
		0.0958904										-0.00138699	-0.0655738														-0.503577	-0.514258
		-0.799139										-0.346769	0.310345														0.643836	0.122974
		-0.112008										0.0152285	0.684866														-0.132791	0.17143
		-0.450382										-0.113653	-0.17134														-0.675174	-0.656192
		-0.246907										-0.421769	0.0564448														-0.0936926	0.43336
		-0.790576										0.22041	-0.147982														-0.20966	0.472868
		0.396825										0.0703364	0.318926														0.500548	-0.287842
		-0.516324										0.025641	0.0147783														-0.293194	-0.058924
		0.138024										-0.229584	0.260123														-0.743863	0.511754
												-0.248149	-0.0575938														-0.328671	0.119185
												0.117835	0.463019														0.108214	0.192825
												0.122578	0.391549														-0.25113	0.242685
												-0.291785	0.284881														0.757188	-0.154756
												0.28	-0.449275														0.0375343	-0.318996
												-0.344955	0.310345														0.21447	0.425379
												-0.620853	0.129125														-0.137494	-0.346705
												0.238616	-0.08299														0.617517	0.236291
												-0.101964	-0.13384														0.482602	0.248055
												-0.455319	-0.146398														-0.117647	-0.481481
												-0.102902	0.346049														0.355932	0.109875
												-0.0718835	0.183976														-0.114303	0.411922
												0.025641	0.781897														-0.261993	-0.294316
												-0.0789474	0.350254														-0.310345	0.276486
												-0.0578158	0.126751														-0.16278	0.0750816
												-0.592299	0.360382														-0.459603	-0.314035
												-0.166512	0.654214														-0.555367	-0.518987
												-1	0.0220049														0.518987	0.15322
												-0.513627	0.0198366														0.328725	-0.522613
												-0.760837	0.0626618														-0.361084	-0.412804
												-0.254279	0.243636														-0.494382	0.308078
												-0.397993	0.720373														-0.0191571	0.0118704
												-0.175258	0.446367														0.165606	-0.484973
												-0.391549	-0.367222														0.226567	0.325581
												-0.597082	-0.507478															0.505919
												-0.410598	0.537572															0.254608
												0.112347	0.397548															-0.273885
												-0.0922844	0.189475															-0.447706
												-0.216724	-0.0348635															-0.417049
												-0.259259	0.366718
												-0.424908	0.0391722
												-0.409653	0.486851
												-0.374389	0.133108
												-0.0547637	0.329286
												0.0446067	-0.349446
												-0.366438	0.593393
												-0.363426	0.393643
												-0.250191	-0.0972324
												0.184229	0.72315
												-0.600286	0.510703
												-0.610538	-0.0431655
												-0.470267	0.314834
												-0.218968	0.159322
												-0.592299	-0.355932
												0.122112	-0.691057
												0.0362694	-0.27619
												-0.0226629	-0.0585586
												0.126437	0.416532
												-0.192825	0.404517
												0.1	-0.0645376
												0.115196	-0.203654
												0.370283	-0.524224
												-0.228588	-0.0425717
												-0.0521327	0.606909
												0.025641	0.456119
												0.189886	0.346049
												-0.86014	-0.21447
												-0.627561	-0.656156
												0.181538	-0.523626
												-0.288136	0.330289
												-0.0755648	-0.0294695
												-0.655729	0.0662177
												0.0995261	0.118985
												-0.412916	0.306905
												-0.912473	0.317794
												-1	-0.025641
												0.238616	0.361084
												0.197183	-0.0720667
												0.396825	0.163115
												0.483313	0.290123
												-0.668165	-0.0414972
												0.013597	-0.035341
												-0.573964	0.420989
												-0.2827	0.459068
												-0.359317	-0.0111524
												-0.276486	0.0922844
												-0.00594273	0.595645
												-0.148489	0.392315
												-0.498208	0.233208
												0.0672359	0.803922
												0.331954	0.0299572
												-0.20966	0.134484
												-0.254369	-0.0921502
												-0.0571247	0.343249
												-0.121482	0.746203
												0.335453	0.490986
												-0.168174	-0.0976253
												-0.222733	-0.352968
												0.0294404	0.659212
												0.057091	0.0878214
												-0.248826	-0.025641
												-0.0614525	0.0198366
												-0.511619	-0.144371
												-0.323383	-0.025641
												-0.236813	0.657827
												-0.343167	-0.280932
												0.234257	0.225806
												-0.609121	0.0857143
												-0.143519	0.0166305
												-0.163831	0.0332326
												0.526971	0.118491
												-0.196526	-0.130054
												-0.752237	0.00792284
												-0.134574	0.265806
												-0.463244	-0.505065
												-0.377059	0.191638
												-0.0528061	0.47527
												-0.310345	-0.0701468
												0.341991	-0.33995
												0.0766355	0.452055
												-0.0667153	0.580137
												-0.522592	-0.249632
												-0.29992	-0.088
												-0.310345	0.618834
												-0.12426	0.1875
												0.216069	0.232647
												0.238616	-0.0921502
												-0.237313	-0.241685
												0.304694	0.294404
												-0.329446	-0.22449
												-0.509934	-0.184549
												0.570193	0.419967
												-0.604905	-0.518987
												-0.510703	-0.15016
												-0.117647	0.458239
												0.229909	0.263658
												-0.320617	-0.254902
												0.0582719	0.0857143
												-0.0602056	0.483483
												-0.449153	-0.205788
												-0.236962	-0.0119466
												-0.425597	0.0798376
												-0.49781	0.662028
												-0.688231	0.677321
												-0.446367	0.495695
												-0.652174	0.187982
												0.0446067	0.175258
												0.24068	0.843214
												-0.267323	-0.0952381
												-0.354405	0.212008
												-0.471831	-0.280932
												0.0921502	0.0469099
												0.310708	-0.025641
												0.440262	-0.0834879
												-0.711712	-0.221374
												-0.480519	0.0809628
												-0.455645	-0.320495
												-0.0588235	0.212008
												-0.291785	0.271375
												-0.169231	0.0544707
												-0.0922844	0.0697674
												-0.329446	0.714964
												0.110307	0.0555556
												-0.154171	0.667171
												0.120886	0.52
												0.043969	0.509564
												0.0598741	0.162641
												-0.651106	0.336683
												0.173057	-0.0939691
												-0.23749	0.353425
												-0.175258	0.480519
												0.178782	0.175258
												-0.517177	-0.184549
												0.351864	0.355581
												-0.241307	0.25684
												-0.678715	0.088017
												-0.927536	-0.561668
												0.711027	0.874082
												0.05	1
												-0.620853	0.416532
												-0.570248	0.270517
												-0.625844	0.334875
												0.637108	0.675174
												0.610542	-0.288056
												0.185185	0.105145
												0.0637466	0.163555
												0.539558	-0.253508
												-0.473684	0.13541
												-0.182879	0.186377
												-0.11546	0.245461
												-0.490986	0.225806
												-0.471199	0.86317
												0.264322	-0.567636
												-0.240235	-0.554596
												-0.419087	-0.201201
												0.025641	0.29099
												0.53702	-0.595745
												-0.225806	-0.273885
												0.00746269	0.105145
												-0.293821	-0.167883
												-0.293821	0.36255
												-0.0310078	0.396074
												-0.480519	-0.10578
												-0.347518	0.806608
												-0.298246	0.631902
												-0.609121	0.60379
												0.0300045	0.175258
												-0.0798376	-0.388118
												-0.117647	-0.364221
												-0.584173	0.0282903
												-0.33643	0.0332326
												-0.0709531	0.117647
												-0.0703	-0.147132
												-0.523294	0.0555556
												0.0612992	-0.131665
												0.025641	-0.0810811
												-0.184934	0.509025
												-0.344262	0.185889
												-0.525547	0.0302398
												-0.298861	0.197708
												0.136364	0.144801
												-0.261033	0.0857143
												0.111111	0.276486
												-0.493537	0.6139
												0.0471976	0.0154712
												-0.685265	-0.0905786
												0.348315	-0.0944395
												-0.294404	0.668293
												-0.440559	0.320314
												0.341991	0.117647
												-0.886525
												-0.52498
												0.102362
												-0.469613
												-0.365751
												-0.480519
												-0.278846
												0.17134
												0.479059
												0.275054
												-0.167493
												0.219664
												-0.599198
												-0.397993
												-0.9511
												-0.23913
												-0.637812
												0.0600707
												0.025641
												0.15797
												0.113106
												-0.168174
												0.187026
												-0.654457
												-0.218968
												0.549407
												-0.456119
												-0.627561
												-0.497066
												-0.165644
												-0.294404
												-0.147425
												0.0405509
												-0.353654
												0.246459
												-0.491589
												-0.181669
												-0.548699
												-0.239469
												-0.244122
												-0.450144
												-0.547511
												-0.0713101
												-0.0220049
												-0.148352
												-0.111111
												-0.263977
												0.170836
												-0.45937
												-0.00594273
												-0.572764
												-0.259259
												0.300613
												-0.607251
												-0.240565
												0.355932
												-0.110546
												-0.341176
												-0.711712
												-0.853659
												0.305483
												-0.0114068
												-0.76308
												-0.0229312

## Sheet: PhasePrecession_Slope
CA1 OUT	PFC OUT		CA1 IN	PFC IN
-461.019	-315.474		632.199	-543.08
-432.045	-315.474		-223.574	-543.08
398.588	-315.474		-661.469	-543.08
-445.808	327.62		251.001	252.579
-633.638	327.62		-343.257	252.579
-469.663	327.62		-419.339	252.579
-179.613	327.62		-191.076	353.75
-659.01	-39.7388		-524.753	353.75
-418.516	-39.7388		-382.386	353.75
767.182	-39.7388		-398.737	-254.729
583.529	-39.7388		-482.375	-254.729
-151.799	-350.349		-485.161	-254.729
-167.981	-350.349		-718.369	-254.729
-311.524	-350.349		753.279	-198.319
-415.764	-350.349		-883.068	-198.319
-94.4667	-162.468		-807.502	-198.319
-152.103	-162.468		-727.318	-198.319
-494.509	-162.468		-99.6236	-287.751
-157.627	-162.468		-99.6236	158.606
-259.324	371.158		-205.385	727.874
-485.763	-269.85		-524.216	727.874
-68.5095	-269.85		-348.888	727.874
-622.58	-269.85		59.3477	727.874
-754.018	-175.012		-389.255	-230.257
-476.786	-175.012		-351.954	-231.516
-72.0773	-175.012		-387.019	-180.439
-396.582	-214.691		-415.303	180.478
-412.629	-457.02		-436.813	180.478
-441.783	-457.02		-419.706	-71.8829
-543.889	-441.172		-419.706	-14.6211
-581.978	-441.172		-309.129	-74.7561
-543.492	-441.172		-323.189	-85.819
-451.102	-441.172		-594.49	54.1068
-458.448	48.3129		-568.108	-27.6445
-434.977	48.3129		-85.9537	-101.895
-414.769	48.3129		-308.538	-106.367
-603.044	48.3129		-559.026	216.038
-425.226	26.0117		-271.661	216.038
-581.436	26.0117		-137.025	216.038
-204.571	26.0117		-439.032	-394.493
-230.679	-31.0803		-734.213	-394.493
-378.152	-31.0803		-766.673	-394.493
-91.6304	-31.0803		-339.129	17.1421
-258.664	-31.0803		-523.027	17.1421
-251.799	195.033		-295.727	17.1421
-242.011	-50.5785		-412.958	15.8295
-352.927	-50.5785		-553.306	15.8295
-593.459	-79.7169		-462.592	15.8295
-845.041	-99.7367		-532.094	15.8295
-856.5	-77.6272		-326.693	21.4835
-694.091	-56.1849		511.625	21.4835
-582.127	-70.2728		613.003	20.2376
-84.5074	-47.713		438.027	20.2376
-84.5074	-47.713		-325.711	20.2376
-208.652	-58.5496		-696.251	20.2376
-421.998	-76.9839		-819.358	29.981
-368.502	-52.2003		365.206	29.981
-115.557	442.569		383.478	17.8278
-115.675	81.9915		458.345	17.8278
-250.025	27.3053		-317.269	17.8278
-146.896	43.9182		-394.522	29.9329
-283.187	15.8467		-419.019	29.9329
-233.526	15.8467		-395.356	29.9329
-98.786	15.8467		-545.483	-306.919
-238.69	15.8467		-545.483	-511.872
-673.694	9.39914		-354.082	-515.406
-846.381	9.39914		-371.663	-501.848
-782.012	9.39914		-474.378	195.138
376.079	21.6985		-431.098	445.098
391.149	21.6985		-141.283	445.098
-673.465	21.6985		-466.22	103.032
-673.465	21.6985		-466.22	-221.345
320.698	20.4207		-466.22	136.458
-710.868	20.4207		-214.008	136.458
-576.516	20.4207		-457.272	136.458
-702.396	20.4207		-457.272	434.301
248.488	-515.989		-457.272	-330.607
-628.84	95.1172		-488.271	264.139
-568.239	95.1172		-434.009	252.269
-849.73	95.1172		-434.419	-509.44
-875.258	337.733		-445.099	-494.481
-346.458	337.733		106.889	223.506
-642.63	503.14		-757.073	223.506
-279.333	150.132		-174.973	223.506
-335.853	-461.223		-629.451	223.506
-163.409	101.357		-530.135	789.017
-447.918	259.456		-688.837	524.56
-425.585	259.456		-688.837	470.023
-468.77	146.245		-673.612	68.7993
-468.77	146.245		-671.472	-119.972
-246.539	556.759		-205.121	-119.972
-306.394	556.759		-382.378	-641.706
-349.472	556.759		721.291	-641.706
-458.964	-192.968		-678.63	519.759
-248.859	-193.146		-806.538	519.759
-667.586	-371.57		305.438	219.494
-554.288	94.3627		-652.018	236.887
-540.474	94.3627		-631.371	236.887
-426.185	230.391		-696.419	236.887
-545.242	-389.516		-185.556	-43.8057
330.51	-389.516		-506.819	-493.537
519.055	72.079		-204.255	-440.951
-240.474	72.079		-411.501	219.281
-607.547	72.079		-462.929	219.281
-670.721	548.422		-491.86	219.281
-763.08	548.422		-463.321	-39.5729
-601.917	548.422		-655.449	-39.5729
-628.308	548.422		-775.469	-39.5729
-391.854	562.6		-735.116	-39.5729
-424.112	-229.109		-519.617	468.163
-419.129	-465.134		-529.649	468.163
-397.038	-465.134		-700.928	468.163
-515.392	-368.652		-771.977	468.163
-557.591	592.88		-735.604	468.163
-528.764	297.106		-660.117	200.307
-441.811	-197.306		-828.089	200.307
-587.715	-48.5337		-257.286	200.307
-616.184	78.3368		-400.371	587.369
-576.711	78.3368		-361.124	423.666
-543.661	-99.4055		-535.049	423.666
-724.32	-99.4055		-715.615	423.666
-826.415	-99.4055		-424.786	423.666
-716.719	-75.778		-617.126	-82.0285
-438.401	-75.778		-601.928	-82.0285
-543.44	-75.778		552.777	-82.0285
-841.851	-88.2707		600.572	-82.0285
-707.828	-88.2707		-616.158	-366.155
-557.582	-88.2707		-746.048	-366.155
-550.283	-88.2707		-528.85	-366.155
-532.4	-107.859		-665.26	-366.155
-585.542	-107.859		-514.905	-93.2752
-639.368	-107.859		-549.76	-93.2752
-665.96	-112.995		-770.491	-93.2752
-240.6	-112.995		-853.378	-93.2752
-571.942	-112.995		-260.145	-93.2752
-682.248	-87.6098		-477.763	-66.3959
-446.804	-87.6098		-243.842	-66.3959
-308.285	-87.6098		-436.611	-66.3959
-780.579	-222.068		-701.026	-91.1675
-460.862	-222.068		492.582	-91.1675
-806.253	270.399		-408.562	-91.1675
-308.466	-107.006		-519.404	-91.1675
-392.979	63.661		-325.838	199.186
-192.97	63.661		-357.035	199.186
-660.86	63.661		-270.739	199.186
-208.492	536.423		-292.181	199.186
-783.521	536.423		-250.763	-80.7648
-430.536	553.918		-317.215	-80.7648
-215.171	202.12		-675.593	-80.7648
258.86	-465.766		-244.756	-80.7648
-170.547	-289.647		-407.489	-493.595
-378.042	481.661		-661.052	-493.595
-384.664	481.661		-636.485	-493.595
-545.805	481.661		-883.015	-493.595
-343.521	-417.145		-729.359	-478.901
-686.249	-417.145		-878.715	-478.901
-216.226	-417.145		-233.343	-478.901
-391.32	-417.145		134.907	-478.901
-370.833	-220.206		-756.304	-478.901
-370.902	-220.206		-464.674	-376.198
-817.168	-220.206		-876.135	-376.198
-357.293	-128.441		-287.945	-117.601
-858.542	-128.441		-334.635	-176.786
-427.845	-202.044		-334.635	179.779
-689.839	-63.1037		-25.0369	508.87
-335.363	-103.364		-26.3066	508.87
-335.363	-105.493		-292.996	508.87
-397.153	-60.2777		-302.803	279.705
-830.674	-60.2777		-200.128	234.229
-509.88	-113.244		574.573	220.567
-545.683	-403.5		152.375	193.011
-617.068	62.4531		-487.982	488.416
-635.598	62.4531		-420.723	488.416
558.086	62.4531		-299.604	488.416
42.3339	266.183		-554.206	488.416
-297.579	266.183		-333.215	-98.1041
255.88	266.183		-333.215	-99.6989
-582.462	-103.085		-649.582	-171.572
-711.74	-103.085		-786.827	-171.572
665.65	184.001		-181.697	-368.981
-782.064	184.001		466.368	-468.535
634.443	184.001		-347.798	-82.5869
-614.582	53.1928		-602.508	-457.558
-612.229	217.566		-633.554	214.162
-185.063	217.566		330.909	214.162
141.004	217.566		-390.869	-110.883
-220.702	34.0378		-467.363	194.528
-580.018	37.5618		-618.079	194.528
-822.642	36.4388		-471.395	194.528
-591.928	-338.135		-420.533	-591.338
-421.474	190.794		-235.144	-591.338
-200.214	91.0689		-567.327	-198.399
197.93	91.0689		-522.034	-198.399
-431.274	-265.447		-290.276	-175.719
-163.797	-265.447		-331.257	-175.719
-552.188	-265.447		-760.271	-175.719
-302.781	-265.447		-637.24	-270.319
-234.226	434.26		791.267	-270.319
-379.354	434.26		-522.308	-270.319
-242.589	434.26		-766.83	-270.319
-395.187	493.454		-691.541	-271.891
-315.789	493.454		-313.161	-271.891
-477.789	493.454		-594.875	-271.891
-462.495	-563.993		155.668	19.7351
811.446	-563.993		294.642	19.7351
-109.424	-563.993		-127.688	-328.027
-221.85	-563.993		-132.4	46.2436
686.344	429.036		-623.84	46.2436
-307.526	429.036		-88.1009	70.2531
-389.555	429.036		-125.887	406.662
583.986	118.359		-122.861	-62.1404
606.752	118.359		-231.311	57.8548
-433.286	362.281		-149.954	64.4974
-561.981	-402.611		-277.647	91.418
-631.039	-402.611		-276.323	61.2975
-70.5345	-402.611		-288.236	-202.761
138.73	-732.145		-391.239	-202.761
-656.865	-114.337		-137.163	-202.761
-355.815	-112.667		-652.396	-202.761
-677.679	-277.917		166.728	169.375
-263.853	-277.917		-361.554	169.375
-673.352	-277.917		-286.292	169.375
-252.775	-278.469		-454.495	-270.272
-459.257	-278.469		-315.382	-270.272
-218.081	-278.469		-322.037	-270.272
-583.057	66.6374		-29.4349	-270.272
-288.924	66.6374		-48.9984	-253.563
-721.364	66.6374		410.657	-253.563
-273.998	419.114		407.561	-253.563
-604.447	419.114		-649.856	-253.345
-446.498	419.114		-384.359	-253.345
-521.904	-154.006		-636.435	-253.345
-290.327	-154.006		-119.155	-253.345
-384.116	-154.006		289.951	-351.251
-520.873	-154.006		533.657	-808.882
-328.342	-179.646		-514.607	529.288
-510.945	-179.646		-359.672	529.288
-17.4816	-179.646		-609.073	93.5278
-497.601	-179.646		-285.95	-48.7888
-497.601	478.378		-671.89	-48.7888
-497.601	478.378		-546.138	-48.7888
-481.345	478.378		-451.074	172.747
-767.439	-250.461		-541.731	172.747
489.391	232.119		302.044	-149.319
-543.069	-498.228		-680.382	-162.576
550.216	288.037		238.277	-162.576
359.15	-242.959		-337.391	-472.368
207.308	-242.959		-569.963	-472.368
467.899	-500.475		-574.61	-472.368
562.237	-500.475		-533.024	-442.65
573.575	-500.475		-527.507	-442.65
415.037	-115.682		-728.415	-425.109
-179.354	-84.3571		-471.319	-425.109
-156.883	-84.3571		-281.292	-425.109
-655.38	133.786		-62.6057	-217.768
130.1	-150.785		-879.601	-217.768
-50.0257	-436.652		-562.773	-217.768
-120.461	-436.652		-429.601	136.071
-107.187	-436.652		-596.209	136.071
-75.4201	-436.652		82.7097	136.071
-165.257	20.929		62.4271	-192.56
-218.822	20.929		-587.657	-217.551
-270.283	-348.838		-448.261	-461.356
-189.721	-348.838		-521.152	240.846
-274.256	-35.7978		340.535	240.846
-343.814	38.425		-565.294	-108.206
-544.073	181.104		-570.666	379.226
-229.588	181.104		-686.411	-193.14
-266.396	181.104		-178.969	534.566
-186.611	-430.476		-312.092	534.566
324.689	-244.121		-584.901	155.151
-703.757	-244.121		-225.11	537.11
-670.049	-244.121		-655.052	-157.263
-252.122	-456.965		-588.994	-154.411
-252.122	-456.965		-678.337	-102.189
-526.234	-456.965		-558.551	186.057
-274.842	-456.965		-537.781	187.988
542.843	-178.457		-516.579	208.099
-723.504	-178.457		-408.067	208.099
-755.929	250.125		-826.817	107.761
-360.207	250.125		-537.783	21.0508
-301.819	250.125		532.946	21.0508
866.963	250.125		-789.472	21.0508
179.492	250.125		531.858	21.0508
-577.247	257.809		-517.094	-570.022
-866.384	257.809		-657.523	-197.738
-551.056	257.809		-614.92	21.387
-441.102	-537.131		-235.154	44.8242
211.024	-537.131		-867.237	-183.51
-184.657	-537.131		728.685	-124.452
-698	-537.131		-511.768	-107.914
386.698	71.2416		-644.086	-207.389
655.617	71.2416		-405.176	-241.098
-366.973	71.2416		-386.797	-241.098
-677.632	-376.04		-329.024	-241.098
-760.812	-376.04		-317.188	141.267
-829.747	-376.04		-443.829	141.267
-464.822	-376.04		-695.088	141.267
-526.921	-311.485		-430.979	476.171
-586.364	-311.485		-780.906	476.171
-784.216	-311.485		-420.189	-200.435
-472.356	238.491		138.347	-200.435
-792.708	258.47		-725.089	-262.289
-328.473	258.47		-509.855	140.776
-422.166	-410.982		-888.478	82.2001
-338.609	-410.982		489.536	82.2001
404.663	300.536		-862.253	82.2001
-486.858	300.536		-339.151	-538.476
-517.526	300.536		797.76	-538.476
-457.534	300.536		-658.724	-538.476
-615.442	41.5883		312.344	-207.762
-329.18	41.5883		-386.838	-207.762
-214.056	41.5883		-229.308	-207.762
866.344	41.5883		-433.604	-207.762
431.731	62.1981		-610.478	-214.698
-83.2681	142.684		-293.513	-214.698
-557.994	-583.867		-668.909	-214.698
-557.994	-583.867		-368.028	47.9366
-187.834	-583.867		-368.028	47.9366
-187.834	384.11		-110.282	47.9366
-102.21	-170.314		90.6989	47.9366
-91.3089	-868.312		-88.3395	99.1251
-573.32	-497.012		-252.863	99.1251
-647.899	-475.233		247.562	99.1251
608.454	183.528		-784.039	211.711
619.774	183.528		-772.987	211.711
-596.565	183.528		-576.579	211.711
-450.071	-293.658		-583.53	211.711
-733.622	-292.728		-676	375.74
-312.56	-292.728		-120.89	375.74
-567.499	-391.103		-216.937	375.74
-552.884	-391.103		-202.447	289.615
540.655	-391.103		-62.2613	289.615
-200.666	-112.722		-58.8676	596.316
-258.983	-15.1516		-681.318	596.316
-257.581	-15.1516		-613.837	127.392
-64.9458	-15.1516		-736.368	-200.426
-73.8346	-15.5488		-605.953	-200.426
307.78	-15.5488		-607.349	-200.426
-334.707	-15.5488		-328.915	-200.426
-334.707	326.893		-256.756	628.955
-178.646	-439.717		-332.866	628.955
40.9022	-439.717		-110.137	-640.741
155.934	201.19		-376.27	155.083
-270.308	201.19		164.184	126.076
108.888	201.19		-261.696	-311.663
-460.868	-112.792		-178.632	-57.0432
-755.758	-150.841		-887.669	-196.684
-865.056	-512.991		-690.66	134.382
-547.712	-287.879		-876.494	-502.292
623.207	-287.879		-503.092	145.879
-880.461	-287.879		-601.213	-474.711
249.768	-52.6702		-741.444	-474.711
-517.843	-52.6702		-136.881	402.957
-550.985	-52.6702		-211.173	402.957
-268.905	-31.7202		-85.2849	402.957
-443.878	-31.7202		-173.595	-46.1712
-655.109	-395.674		-104.649	-46.1712
-685.784	-167.513		-189.071	-46.1712
-475.481	-167.513		-202.372	-232.882
-745.493	-167.513		-202.372	-232.882
-703.374	-139.644		-149.308	-259.99
-270.362	-139.644		-133.553	-261.929
-270.362	-139.644		-325.602	-261.929
-656.587	-127.662		-311.077	80.6722
-177.502	-127.662		-382.764	80.6722
-80.742	-127.662		-503.404	236.447
-80.742	-162.486		-154.404	236.447
-638.98	-162.486		-372.68	236.447
-158.166	-162.486		-556.822	292.143
450.754	-181.706		-499.584	-296.822
-807.815	-181.706		-615.792	-24.9848
-431.054	-181.706		-482.95	-24.9848
-377.437	-181.706		-521.926	-24.9848
-114.814	-215.223		-626.729	-24.9848
-748.589	-215.223		610.839	-18.6186
-419.183	-215.223		-791.742	-18.6186
-248.869	-215.223		-226.54	-18.6186
-153.678	361.633		344.813	-18.6186
-364.094	361.633		617.925	-468.307
-422.057	-134.718		85.9416	-468.307
-165.289	-134.718		86.8142	-468.307
-222.738	-134.718		-143.692	-468.307
52.9159	-134.718		-628.117	334.073
-249.653	-336.478		-715.304	334.073
-294.731	-336.478		-418.779	334.073
-284.885	-152.255		-773.424	-351.476
-318.823	-152.255		-527.659	-351.476
-393.811	-152.255		-404.732	-454.835
-393.811	-152.255		-384.587	373.459
-134.45	253.793		141.07	373.459
-134.45	253.793		-681.448	373.459
-419.552	447.528		-829.182	373.459
-419.552	-111.737		-869.571	-46.9066
-616.791	-111.737		-544.95	-46.9066
-614.221	-236.257		-186.417	-46.9066
-278.997	-236.257		-712.401	-31.7709
-280.39	-236.257		-509.995	-31.7709
417.602	-236.257		-311.741	-31.7709
-278.825	170.513		-466.179	-73.1067
-629.273	170.513		-615.293	-73.1067
170.764	255.887		-705.394	-73.1067
-274.595	255.887		62.9435	-73.1067
-397.712	255.887		62.9435	-23.7964
-706.871	131.937		-514.228	-23.7964
-706.871	131.937		-308.477	-23.7964
-636.393	116.862		-308.477	-56.2921
-426.703	116.862		291.689	-56.2921
-413.61	-640.105		316.527	-56.2921
-386.373	-640.105		-547.024	-56.2921
-269.913	-633.241		-570.801	-54.0522
-413.01	-640.105		-547.024	-54.0522
-498.843	-573.7		-688.836	-54.0522
-149.809	-573.7		-338.656	-259.116
-179.802	-573.7		544.808	-259.116
-115.572	-573.7		-470.822	-441.373
-115.572	563.876		-510.203	-441.373
-628.926	275.029		-404.844	-164.105
-846.21	741.434		207.799	-329.43
-743.779	504.303		222.113	-329.43
-748.144	-416.647		200.529	617.8
-741.507	-416.647		-253.827	-85.7594
-412.961	-96.0586		-521.542	-85.7594
-533.9	-73.5627		-512.446	-85.7594
-456.37	126.675		-484.887	-85.7594
-851.601	346.788		-524.083	697.097
375.115	346.788		-524.083	697.097
-733.717	346.788		-596.111	697.097
-614.903	364.381		-547.593	-183.625
-737.867	-246.718		-314.867	-183.625
452.707	-262.676		-286.848	-417.96
-678.375	-246.718		-167.048	-417.96
-351.223	-262.676		-408.243	-417.96
-466.336	-43.3419		-477.992	-417.96
-200.553	-43.3419		-708.991	575.014
-302.272	-347.119		-767.089	585.518
-420.634	-347.119		-349.686	-605.244
-485.586	-314.153		-573.938	-600.739
-376.821	-314.153		-534.3	-600.739
-423.456	499.964		-581.46	-118.686
-354.587	499.964		-603.685	-122.039
-808.356	347.548		-87.3201	-95.7204
-589.844	-357.013		-149.435	420.361
-570.958	-357.013		-421.39	420.361
-404.352	206.728		-712.792	-188.329
205.173	451.909		-380.859	-188.329
143.007	438.35		-545.947	-188.329
-78.815	438.35		-534.164	-188.329
-560.903	438.35		-601.879	221.379
-488.164	301.193		-429.566	221.379
-579.983	301.193		-478.491	221.379
-332.187	-786.036		-278.804	221.878
-442.535	-786.036		-554.905	221.878
-118.067	-786.036		-219.36	221.878
-481.101	-509.026		-796.982	-231.885
-776.143	-509.026		-351.105	312.868
-615.838	-738.168		-781.557	193.721
-221.29	325.179		-642.029	678.128
-340.641	191.442		-601.709	-454.211
-360.266	177.612		-800.114	202.616
-544.161	-93.9136		-616.427	202.616
385.167	548.72		-586.225	202.616
385.167	548.72		-676.224	-386.207
-201.977	548.72		-233.105	-569.695
207.18	-273.697		-713.149	-273.598
-506.453	-273.697		-538.443	-273.598
-401.504	-273.697		-383.021	-250.428
-445.214	-273.697		-484.989	-250.428
-172.982	-202.619		-360.316	-251.511
-600.27	-202.619		-439.919	-299.506
-577.972	-202.619		-425.936	-314.729
-446.6	-202.619		-471.899	109.793
-604.824	-188.115		-235.043	-200.913
-593.561	-188.115		-580.423	-133.908
-541.981	-188.115		-310.335	-247.392
-506.811	-149.616		-444.231	-247.392
-625.962	305.255		-328.482	-247.392
-555.696	-61.9045		-358.773	-247.72
-489.066	119.787		-618.337	-494.727
-576.236	118.367		-782.739	-494.727
-559.27	-115.707		-749.69	-478.387
-600.077	-115.707		-702.372	-471.407
-259.036	501.368		-534.068	-176.87
-725.763	534.009		-739.807	-264.794
-605.779	501.368		-146.833	-264.794
-605.232	501.368		-586.542	-264.794
-623.754	564.7		-653.908	-289.606
-622.116	-277.919		-541.052	-455.632
-466.342	77.6307		-768.921	-455.632
-334.64	239.783		-592.504	-455.632
-187.836	-222.925		-444.313	-662.792
-237.825	-222.925		-422.117	-662.792
-446.473	-222.925		217.226	-662.792
-334.679	-221.615		-413.855	-662.792
-238.384	-221.615		446.291	-203.453
-238.384	-221.615		-328.002	-203.453
-205.342	228.243		-809.294	-203.453
-166.945	228.243		-401.4	-203.453
455.875	228.243		-490.746	-482.35
-185.357	228.243		-464.7	-482.35
-665.3	-374.12		-495.364	-482.35
-58.1425	-374.12		-359.515	-482.35
-58.1425	-374.12		-479.56	166.232
-193.217	22.3202		-366.035	132.411
-189.175	22.3202		-409.68	-371.765
-669.378	22.3202		-574.971	-371.765
-669.089	41.9954		-269.998	-374.084
-384.336	-407.37		218.537	182.018
-384.336	-419.965		-554.528	-378.958
-384.336	12.0684		-576.967	-418.275
-286.207	12.0684		-705.968	-361.184
-306.968	12.0684		106.457	196.523
-153.173	12.0684		123.564	-362.044
-153.173	-399.798		-422.624	-249.919
-178.41	-399.798		-273.512	-389.532
-176.141	-399.798		-392.924	-384.965
-152.695	-399.798		-470.664	-486.123
-555.631	222.975		-646.077	-486.123
-584.853	222.975		-648.659	-93.2678
-584.853	222.975		-474.325	-93.2678
-336.361	588.645		-434.098	-93.2678
-465.704	261.68		-411.195	-136.289
-526.834	-385.169		-641.977	199.978
-732.885	228.494		-708.016	199.978
-626.137	228.494		-765.424	199.978
-676.587	228.494		-440.967	265.462
-552.81	-679.579		-588.26	265.462
-447.754	123.368		298.156	-846.498
-539.897	173.993		-507.845	498.145
-582.848	173.993		468.104	490.451
-626.637	-221.703		-805.202	490.451
-638.788	-221.703		-653.525	218.236
-594.377	-221.703		-735.881	218.236
-225.597	-221.703		-256.485	218.236
-419.129	-221.703		-470.472	604.949
-304.02	-414.273		-641.986	604.949
-371.85	-414.273		-658.8	604.949
-623.969	-414.273		-425.609	604.949
-872.56	-414.273		-618.52	-799.59
-861.788	368.578		-512.028	103.556
-664.003	334.778		-536.037	103.556
-514.099	-169.39		-599.735	103.556
-543.958	-169.39		-248.316	333.125
-152.79	235.155		-825.933	-235.56
-450.022	235.155		-701.375	-336.071
-406.682	75.6803		-562.056	-275.026
-517.007	75.6803		-200.745	-284.801
-308.583	119.292		-282.919	436.138
-262.952	143.783		-282.641	436.138
-654.259	89.8594		-526.255	274.261
-263.002	79.624		-522.651	274.261
-678.111	423.061		-458.294	274.261
-312.471	-80.742		-514.126	425.322
-403.67	-493.622		-437.447	425.322
-350.618	-89.1477		-438.322	425.322
-559.878	-101.593		-515.985	19.4425
-642.792	-215.196		-481.044	19.4425
-442.737	-589.952		-618.105	68.2593
-587.968	172.468		-196.073	26.2863
-699.377	172.468		-457.239	26.2863
-155.888	-107.134		-194.282	26.2863
-153.517	-97.3512		-440.398	26.2863
-648.045	-74.7484		-544.731	-71.2071
-660.839	237.39		-481.404	-71.2071
204.568	237.39		-538.138	-71.2071
-704.683	-440.336		-525.063	-71.2071
-766.144	-440.336		-574.114	-422.304
-761.523	311.974		-771.841	83.1114
149.019	307.891		-474.968	83.1114
425.786	-634.554		-380.051	181.721
865.068	97.6432		-355.866	177.406
-341.15	90.2026		-518.977	177.406
-688.914	90.2026		-651.482	177.406
-674.552	564.136		-585.175	177.406
-854.922	520.535		-695.144	320.241
-749.881	564.136		-644.473	-111.116
-655.614	-135.127		-688.851	470.436
-200.974	-135.127		-652.302	470.436
-524.229	332.132		-638.871	470.436
-421.823	-213.98		-565.776	470.436
-649.896	282.493		-598.817	154.274
-781.114	571.893		-526.001	154.274
-734.85	571.893		-501.165	-212.993
-716.582	172.875		-458.986	-212.993
-659.968	-227.05		-440.799	-212.993
-361.624	-227.05		-248.154	76.5234
-431.284	-227.05		-413.586	76.5234
-575.291	-442.144		-379.472	374.837
871.503	-442.144		-462.514	-149.662
519.633	267.886		352.152	-420.205
376.404	267.886		-532.086	-420.205
-544.935	-258.158		-430.108	-169.789
854.362	-193.214		392.203	-335.685
121.03	-193.214		-616.672	-78.3053
110.689	-193.214		-726.627	-58.5673
533.54	-378.237		-829.59	65.6113
190.424	-378.237		-821.653	731.249
167.145	-378.237		-795.156	-371.062
-672.836	-378.237		-848.325	743.659
-523.847	270.659		-548.834	125.798
-781.196	270.659		-634.802	125.798
-822.341	270.659		874.68	125.798
-365.638	-178.011		-770.715	-643.797
-412.652	-178.011		120.804	-643.797
-403.157	-178.011		-239.025	-643.797
-462.196	-517.589		-127.814	-618.062
-487.206	-517.589		-469.821	-618.062
-605.511	-517.589		-279.794	-618.062
-565.041	-517.589		-233.353	-182.615
-569.099	-826.04		-477.703	-180.009
-537.676	-192.68		-625.629	241.669
-808.93	127.472		-704.896	244.59
-649.808	-231.917		-626.307	-166.086
-801.043	-402.568		-644.149	-391.252
-739.157	754.807		-513.12	213.633
-569.049	680.348		-482.348	516.447
-93.8651	27.7967		-252.425	-312.98
-828.403	27.7967		-252.425	-312.98
-846.208	27.7967		-749.14	-312.98
-833.948	27.7967		-709.492	-246.865
-748.173	-128.331		-485.525	-246.865
-667.49	451.227		-826.005	447.13
-587.807	451.227		-837.2	447.13
-825.436	103.983		-573.493	447.13
-809.551	-334.643		-370.655	-360.294
-150.84	-332.472		-357.366	-360.294
-126.026	-332.472		-544.766	-360.294
-126.026	-541.599		-88.4528	-836.695
-510.979	-329.777		-88.4528	-498.389
-179.669	-633.064		-507.396	-618.824
-392.859	-633.064		658.805	-543.369
-179.669	-633.064		-816.832	-543.369
-283.917	49.783		708.721	752.211
304.522	134.556		-688.489	752.211
-225.599	-303.669		-122.331	752.211
-883.663	-303.669		-452.838	94.9463
-608.611	-303.669		-588.58	94.9463
-691.687	-433.42		-378.13	52.4687
-197.996	-433.42		-543.124	50.7868
-493.741	-433.42		-451.785	52.4687
-504.516	-211.246		274.912	50.2574
-218.189	-208.699		-433.648	71.5211
-205.809	-49.203		-502.922	71.5211
-390.893	-49.203		-312.169	302.406
-188.317	-49.203		-408.194	-218.125
-216.503	682.078		-607.429	303.741
-271.763	682.078		-554.756	307.02
-186.19	682.078		-730.699	-449.338
-360.786	-279.506		-452.119	-449.338
-360.786	-674.056		-338.867	245.788
-478.293	-674.056		-549.135	245.788
-536.236	147.726		-594.011	-264.91
-558.095	588.85		-464.006	428.493
-570.987	588.85		-401.688	428.493
-627.435	-515.841		-466.71	428.493
-586.188	-515.841		-612.278	428.493
-642.642	-515.841		-268.997	-182.168
-577.956	375.931		-346.751	-182.168
-686.513	375.931		-528.413	-182.168
-601.933	375.931		-502.285	-172.367
-628.905	228.094		-561.203	-172.367
-577.569	31.8656		-440.647	-172.367
-702.271	31.8656		-659.445	-172.367
-633.149	18.7532		344.548	514.253
-103.634	18.7532		-291.509	514.253
-212.679	18.7532		-289.996	514.253
-258.628	47.1451		-764.041	514.253
-550.62	-257.39		-299.817	178.546
-653.204	-257.39		-680.415	178.546
379.926	-257.39		-446.068	-32.5091
526.58	-582.932		-653.167	-32.5091
-820.3	-625.793		-601.878	-32.5091
-387.49	-581.743		-666.209	-241.495
-389.728	-491.314		-705.37	-241.495
-491.548	-32.7097		-529.59	-241.495
-373.656	-32.7097		-785.266	360.407
130.744	-32.7097		-666.936	549.776
-745.265	-32.7097		-543.66	-169.773
-655.105	-27.1495		-782.838	-169.773
-774.237	-27.1495		-800.281	-113.108
-483.672	-27.1495		344.556	-113.108
-675.924	214.641		-569.691	-222.311
-680.454	214.641		-482.663	-222.311
-524.092	214.641		-550.271	-222.311
-512.594	-36.3047		-523.504	-222.311
-512.594	-36.3047		-690.872	-164.981
-92.6917	-36.3047		-648.862	-164.981
-319.323	-36.3047		-524.472	-164.981
-323.974	-463.57		-243.379	-164.981
-644.034	-463.57		-193.197	-624.016
-302.684	-463.57		312.649	-624.016
-305.964	384.585		-683.317	-624.016
-708.646	530.663		-584.804	-624.016
-652.288	305.883		-545.238	110.425
-565.153	305.277		272.187	-469.841
-662.053	614.8		-326.555	-469.841
-438.676	614.8		-563.116	-469.841
-438.676	650.689		-829.835	-469.841
-275.609	-245.317		-887.673	-620.587
-267.887	-521.204		-708.096	-23.7009
-267.887	-521.204		279.35	-23.7009
-424.635	-521.204		-589.974	-23.7009
-424.635	-521.204		-754.056	-23.7009
-328.382	-637.515		-332.506	192.432
-470.431	-637.515		507.029	192.432
-623.812	-637.515		-366.789	192.432
-783.664	212.964		-870.305	192.432
-376.119	212.964		-849.008	227.33
-580.233	212.964		-726.924	227.33
504.832	-164.595		-855.376	227.33
-446.708	-164.595		-864.52	-70.378
-374.924	-164.595		430.514	-70.378
-474.634	-164.595		792.248	-70.378
266.714			341.354	-227.958
-594.997			-722.403	-227.958
-553.198			-451.887	-227.958
-680.121			-404.362	-38.3758
-705.508			-440.899	-38.3758
-743.965			-318.798	-38.3758
-539.975			-472.286	-140.78
-706.724			-246.586	-140.78
-647.098			-262.381	371.531
-522.308			-262.381	371.531
-747.767			-240.516	371.531
-634.666			-885.812	509.423
-853.328			-877.858	509.423
-654.525			-877.858	509.423
-520.651			-850.454	-70.2359
-519.935			-167.738	-391.296
-388.037			-558.846	-423.379
-469.148			-582.945	-423.379
-471.474			-168.89	-423.379
-704.193			-446.375
-561.969			-207.513
-477.873			-308.468
-656.566			-231.236
-631.457			-570.312
-531.721			-453.204
-588.02			-129.389
-390.268			-224.704
-836.714			-734.269
-372.51			-628.295
-821.489			-781.863
-68.0875			-707.448
-423.363			-516.38
-417.822			-389.272
-394.459			-427.61
-473.094			-484.329
-425.425			-436.061
-342.4			-390.611
-474.084			-747.839
-481.916			-632.729
-575.157			-805.085
-577.901			-623.26
-431.522			-547.343
-733.451			-762.565
-490.669			-708.577
-272.291			428.726
-637.421			-378.066
272.649			-365.963
-264.386			-365.963
-661.288			-743.302
473.636			-820.009
-803.852			-216.676
-358.958			476.084
-819.178			-672.856
-302.222			424.183
-265.088			360.167
765.807			360.167
-422.098			-326.169
-597.663			649.37
-514.822			591.68
-598.284			-160.162
-527.003			-105.433
-615.13			-447.85
-417.401			-490.468
-711.271			-214.635
-675.721			-217.013
-698.817			-604.707
491.545			-780.287
-551.599			-683.5
-692.08			-376.113
-738.073			-368.212
-507.759			-311.89
-428.128			-834.604
-773.446			-838.917
-639.638			-402.904
-365.325			-606.244
-681.11			-401.726
-109.546			-450.243
-592.168			-273.14
-636.376			-346.638
564.779			-424.718
572.807			-241.964
572.807			-704.685
-747.068			-704.685
127.008			-216.983
-653.556			-452.321
110.5			-709.091
-151.184			-488.296
-154.188			-249.717
-551.646			-482.522
-551.646			-482.522
-529.49			-482.522
-329.098			-482.522
-487.413			-260.234
-799.493			-186.526
-398.604			-119.245
-862.527			-189.001
-862.527			444.213
-340.548			-234.102
-488.537			-775.241
-297.844			-705.378
-474.487			-363.728
-776.095			-839.378
-830.83			-315.759
-359.389			-116.64
-317.209			-279.573
-402.523			-410.805
-305.993			-410.805
-464.535			-671.198
-390.025			-825.918
-564.86			179.313
-573.584			-666.872
233.343			396.626
-529.926			-747.058
-460.66			689.896
-479.284			-151.478
-479.284			-212.904
-581.082			-212.904
-446.84			-97.7481
-440.924			-153.853
-584.313			-722.858
-800.367			-709.665
-451.087			-529.965
-575.716			-529.965
-625.033			-202.975
-448.927			-632.008
-365.66			-465.737
-426.749			-685.497
-179.91			-651.711
-179.91			-517.594
-259.112			-744.634
-273.276			-501.429
-332.724			-528.423
-347.462			-133.755
-180.726			-564.3
258.113			-454.142
-406.856			-284.064
-414.353			-625.392
-513.767			-591.671
457.836			-556.383
-429.054			-843.474
-436.712			-551.528
-429.054			-666.43
-139.095			-501.513
-142.384			-680.606
-358.075			-836.641
-587.515			-520.4
-575.313			575.004
-538.739			-597.061
-644.541			-680.848
-822.318			-620.966
-720.89			-714.448
-411.699			-747.2
-391.682			-426.748
-428.655			-565.546
-401.821			-546.398
-638.858			-595.803
-295.158			-67.6133
-310.167			-551.497
-92.1364			-139.478
-356.004			-679.57
-109.234			-882.947
-415.235			-281.752
-220.437			-394.242
-438.454			-379.251
-204.599			-251.832
356.743			-121.035
356.743			-218.776
-520.305			-450.71
-416.004			-710.934
-358.75			582.833
-358.75			-322.514
-354.485			-376.809
-591.603			-290.146
-118.713			-212.351
-488.337			-212.351
-533.335			-186.614
-445.446			315.165
-459.173			-440.765
-377.868			347.641
-477.454			-161.583
-453.739			-227.195
-413.631			-407.782
-504.116			-844.453
-709.484			-535.825
-408.405			-356.795
-838.644			-166.96
-468.798			251.337
-633.249			-216.687
-551.063			-364.418
-398.401			-474.606
-670.838			-419.448
-683.572			-720.222
-468.949			-338.281
-761.083			-732.697
-653.501			-263.203
-699.971			-464.433
-585.288			-336.812
-498.131			-424.912
-627.544			-403.553
-370.321			-365.725
-203.971			-287.976
165.378			-507.934
-241.151			-125.13
-170.066			-406.726
-581.585			-314.139
-573.844			-427.449
-307.158			-245.692
-691.566			-406.181
353.38			-663.197
-825.932			596.085
-288.897			-207.925
-126.722			-621.65
-617.186			-421.415
-601.874			-589.599
232.125			-679.383
599.64			237.071
-167.799			-131.68
-285.951			-148.949
-308.154			51.9661
-280.499			-150.212
-333.568			-156.743
-557.259			-378.7
-636.114			-521.923
478.226			-521.946
-680.363			-307.044
-737.065			-473.208
-737.065			-233.993
271.773			-196
375.096			-293.059
-450.735			-447.259
-532.897			-449.905
-561.026			-186.486
-607.285			-186.486
-239.21			-612.06
-150.209			-626.419
-382.134			-668.635
-225.857			-668.635
-145.594			-401.225
-186.433			-698.417
-270.818			-814.167
-392.609			-477.02
-366.607			-687.626
-791.246			-596.825
-164.188			-131.222
-220.08			-181.435
-208.8			-207.655
-571.033			-294.304
-556.428			-237.395
-461.585			-309.606
-288.288			-187.544
-583.64			-179.067
-298.185			-193.886
-441.24			-303.276
420.268			-178.213
-463.849			-223.903
-363.551			-272.628
-192.039			-77.1633
-136.394			-298.965
-382.68			-33.5637
-177.423			-33.5637
-489.692			364.358
-494.188			-215.422
-209.144			-68.7752
-590.431			301.738
-557.304			-270.924
-576.189			-431.832
-211.652			-125.228
-363.534			-99.6015
-439.487			-103.059
-510.214			-179.53
-357.702			-214.607
-357.754			-132.458
-579.81			-87.0473
-377.057			-323.735
-453.73			-303.103
-286.567			-189.841
-783.619			-169.011
-70.3269			-179.994
-62.0862			-526.001
-554.942			-230.125
-548.722			-77.191
-118.211			-113.174
-110.26			-587.085
-422.171			-546.12
-487.222			166.29
-151.902			178.135
-450.784			-185.017
-661.503			-318.538
-288.442			-108.112
-515.342			-361.541
-495.146			355.764
-379.347			-799.514
-449.419			-735.005
-797.967			-454.748
-595.856			-690.232
-647.494			-682.401
-256.001			-311.896
-257.833			-606.521
-754.51			-406.551
-350.259			-476.034
-185.924			-158.238
-306.714			-228.064
-154.579			-576.537
-339.842			151.807
-296.386			-644.99
-312.866			498.624
-372.827			-418.851
-181.587			-367.542
-322.457			-173.739
-211.268			-537.51
-280.193			-423.022
409.245			-728.761
-337.931			-705.132
-447.477			-351.89
-244.871			-548.957
-241.895			-392.101
-166.649			-440.541
-319.927			-451.979
-167.737			-556.931
-390.884			-555.707
-588.902			-517.231
-635.241			-135.965
-117.513			-420.969
-501.603			-230.781
-296.434			-642.626
-224.452			-571.743
830.536			-577.781
-329.237			-560.238
-662.533			-283.164
-793.57			-59.1213
517.436			-468.735
111.835			-760.997
-150.17			-687.89
250.117			-261.625
-91.0106			-647.324
-155.066			-217.291
-800.564			-593.459
-240.702			-318.931
-380.366			-336.766
-308.962			-442.598
-308.962			-633.146
-359.692			-424.677
-62.8332			-601.076
-461.219			-705.286
-447.219			-406.584
-429.134			327.821
-421.046			-615.586
-571.342			-681.484
-483.836			-607.91
-462.915			-485.268
-486.856			-448.983
-309.89			-434.63
-291.233			-382.692
-605.802			-159.307
-276.953			-565.952
-574.493			-546.22
-512.104			-196.075
-241.991			-196.075
-476.001			52.3422
-466.579			55.9258
-354.119			-133.633
-319.73			-261.677
-324.831			-305.922
-324.499			-310.276
-240.699			-310.276
-384.076			650.81
-401.433			-412.403
-484.588			-412.403
-462.093			-431.405
-114.936			156.841
-606.955			156.841
-132.891			-408.134
-130.659			-569.264
-132.891			-595.352
-384.469			-85.161
-384.469			-86.3879
-437.204			-607.839
-460.528			-443.965
-460.528			-512.708
-447.653			-476.884
-447.653			-267.622
-553.083			-357.286
-573.371			-357.286
-472.265			-202.402
-472.265			-212.989
-154.035			-206.021
-487.989			-86.579
-376.793			-179.549
-432.156			-118.824
-592.127			-704.854
-797.019			-614.372
-93.2922			-445.351
-410.957			-333.23
-496.858			-177.102
-496.858			-223.844
-181.562			-164.153
-279.549			-164.153
-248.644			-450.694
137.876			-257.358
-379.478			-315.609
-518.664			-338.891
-240.766			-501.856
-589.449			-253.322
-243.601			-550.189
-248.465			365.726
304.686			-466.718
-245.284			-246.987
-397.967			-288.593
-143.633			-428.78
-164.324			-505.825
-162.666			-715.505
-607.162			-441.816
-520.403			-440.399
-367.867			-396.616
-367.765			-424.933
-347.009			-477.062
-386.364			-468.224
-274.446			-582.121
-537.275			-403.518
-344.328			-666.995
-678.557			-421.175
-624.471			-443.785
-567.999			-660.083
-398.979			-557.334
-571.898			-642.772
-451.398			-561.237
-535.481			-252.243
-550.775			-280.487
-599.24			-303.839
-494.39			-275.995
-632			-297.786
-551.441			-352.456
-512.472			-447.83
-495.292			-530.66
-303.229			-99.6226
-578.526			-114.96
48.1887			-99.6226
-477.611			-200.466
-477.611			-75.5962
-43.3471			-333.112
-43.3471			-333.112
-43.3471			-47.8804
-723.624			-349.16
-723.624			-349.16
-368.035			-418.58
-278.202			-743.07
-266.189			100.726
-315.295			-374.622
-348.09			-369.342
-348.09			-807.201
-291.784			64.8465
-374.617			71.3259
-310.314			-307.515
-421.855			-854.888
-332.513			-475.638
-322.479			-405.45
-455.754			-652.938
-327.426			-442.082
-305.864			-310.368
-296.598			-521.514
-296.598			-368.744
-340.72			-458.64
-394.492			264.013
-199.26			-410.614
-124.85			415.111
381.108			409.986
-658.233			-81.131
-450.541			-459.323
-123.38			-338.432
-336.058			-555.666
-336.058			-250.127
-238.397			-720.684
-70.6594			-711.452
-108.87			-711.452
-87.4416			42.2135
-617.38			42.2135
-445.359			42.2135
-445.359			33.9236
-445.359			184.719
-361.246			-397.595
-595.998			-289.189
-595.998			-360.273
-595.998			-763.391
-421.42			-781.612
-507.122			-674.544
-507.122			-335.311
-502.343			548.89
-506.127			-754.501
-695.356			250.978
-596.104			-775.174
-362.753			-487.428
-568.127			-432.653
-430.527			-527.481
-601.727			-633.061
-502.845			-542.224
-372.86			-278.932
-372.86			-718.613
199.66			-748.41
-385.823			-661.58
-711.562			-810.042
-268.144			-383.331
285.184			-318.79
-279.156			-170.724
-230.021			378.714
-190.014			-567.292
-424.718			-567.292
-465.733			-610.711
-696.516			-597.449
-565.315			-523.59
-495.276			-644.324
-468.755			-378.847
-367.995			-346.196
-541.297			-390
-481.662			-812.501
-659.428			-357.045
-793.893			-589.483
-534.061			-454.028
-682.106			-337.443
-692.977			-665.632
-337.485			-429.244
-695.375			-368.938
-634.561			-484.916
-368.973			-254.281
-510.457			-430.937
-533.896			-519.771
-269.537			-441.949
-363.935			-230.394
-493.27			-364.337
-403.313			-369.869
-477.583			214.372
-400.545			-118.853
-500.069			-254.318
-458.09			-293.725
-522.221			-300.203
-413.915			-398.72
-339.976			-381.128
-453.5			-342.641
-818.195			660.809
-305.305			-356.831
-416.484			-383.489
-401.976			-533.92
-702.34			-706.739
-474.213			-425.777
-608.508			-581.942
-187.461			-477.543
-78.6634			-308.729
-57.5347			-406.299
-343.366			-343.223
-226.282			-234.472
-185.544			-316.718
-354.034			-593.232
-452.528			-671.661
-384.44			-532.032
-767.103			-503.2
-587.351			514.382
-307.008			-240.039
-595.255			215.258
-646.858			-402.555
-587.436			-399.263
-839.305			-471.064
-464.101			-329.28
-433.757			-646.304
-357.501			-707.414
-391.775			-143.724
-357.011			-368.945
-311.937			699.634
-294.58			855.4
-392.66			-573.88
598.05			-692.516
-327.615			-886.389
-337.1			-304.904
-239.328			-311.38
-239.328			-262.253
-522.035			-164.588
-779.682			-160.012
-264.492			-135.164
-113.75			-275.199
-463.325			-329.905
-528.205			-133.71
-132.844			-127.197
-462.065			-191.605
-130.897			-478.446
-403.341			-653.264
-561.28			466.113
-480.406			391.917
231.022			-393.666
231.022			-484.13
-248.601			-516.221
-266.364			194.258
206.361			-297.828
206.361			-304.499
-281.809			-350.313
-103.925			-335.67
-105.913			-343.481
-288.113			-452.639
-286.34			-514.054
-336.153			654.379
-466.437			-506.034
-432.796			128.63
-395.02			-485.215
-219.22			-540.402
-318.716			-435.57
-411.916			-547.886
-238.221			-478.508
-562.786			-357.839
-645.474			-316.001
-244.39			-428.552
-693.244			-457.902
-688.966			-574.885
-459.887			300.839
-491.289			-335.041
-541.887			-601.937
-607.189			-356.25
-510.476			844.346
-176.721			-594.12
-383.827			-356.161
-375.666			-433.285
-337.665			-235.156
-272.155			-294.795
-282.712			-622.367
-800.244			202.596
-678.57			-443.858
-621.239			-511.433
-431.706			155.224
-421.616			155.224
-255.48			469.082
-235.095			-488.082
-473.745			-625.161
-87.8784			-136.164
-93.0749			445.97
-93.0089			149.629
-325.916			179.023
217.422			-346.193
-116.486			-403.166
-309.193			-566.07
-137.893			-276.749
-501.076			-497.533
-95.5775			-153.777
-326.773			-562.26
-500.011			-186.617
-645.966			-172.206
-176.835			-602.148
-179.419			-103.82
61.7141			-103.82
-752.379			-103.82
-255.066			-267.877
-253.28			-157.039
-274.306			-472.111
172.591			-472.111
279.435			-131.932
172.591			-196.818
-372.194			-231.658
-372.194			75.2673
-231.379			76.1711
-216.604			-377.753
283.65			-537.824
-294.841			-379.396
520.138			-488.33
366.878			-276.774
-444.986			-228.868
-263.976			-134.871
-172.986			-151.1
-68.0779			-151.1
-78.1322			-236.846
-174.001			-154.124
-174.001			-644.954
-283.512			-351.714
-283.512			-338.375
-285.105			-217.641
-285.105			821.034
-561.173			821.034
-329.655			-570.271
-88.1603			-377.517
-121.962			-373.019
-121.962			-803.135
-121.962			311.537
-106.297			316.271
805.754			120.965
805.754			-610.2
-244.324			-304.408
-317.229			-637.097
-883.737			550.024
-631.401			-718.806
-849.277			-536.189
-852.005			-725.65
-159.271			-525.001
-195.21			-750.883
-346.09			-265.493
-816.923			-393.355
-248.717			-590.407
-480.157			-474.709
-447.079			-238.285
198.437			-379.958
-540.231			726.109
-386.008			203.397
-663.047			-318.547
-784.69			-159.027
-517.07			-426.318
-517.07			-470.993
-578.924			-106.562
392.11			-297.26
-417.57			-277.332
-244.579			-386.24
-129.668			-162.64
-129.668			-162.64
-244.579			-506.51
-244.579			-217.277
-805.024			-686.06
-753.701			-404.752
-852.783			50.6787
-800.955			-568.742
-576.776			-494.901
-499.122			-493.31
-299.1			-289.51
184.981			-519.264
-367.988			-529.41
-751.078			-295.858
-407.753			-228.89
411.494			-496.021
-228.541			-405.321
-391.345			-505.721
885.163			-207.876
-566.082			-407.989
-313.393			-320.653
-308.445			-536.689
-367.734			-451.661
-282.491			-426.339
-724.137			-458.41
-186.127			-510.672
-197.558			-169.308
-623.17			-625.817
-512.772			-516.7
-681.412			-601.196
-718.006			-574.317
-713.192			-484.854
-195.306			-268.889
-195.306			283.888
-707.444			-159.045
526.381			-159.045
-637.815			-596.833
384.264			-332.081
-289.625			-258.924
-322.925			357.148
-145			-477.333
-862.375			-234.261
-179.668			-728.443
-727.169			-831.748
-170.716			393.097
-596.467			-398.751
-317.65			196.82
-739.421			541.953
-829.946			-231.132
-530.654			-635.575
-678.974			-339.139
-637.062			-593.528
-542.923			-573.929
-737.619			316.1
-361.189			-658.704
-361.941			-484.947
-578.301			-401.708
-448.496			-549.92
-697.321			-582.567
-479.162			-290.253
-526.973			-544.91
-503.46			-544.035
-587.248			-659.814
-378.46			-654.588
-528.367			-391.957
-557.685			211.583
-642.618			-497.174
-503.678			-542.194
-404.524			-573.681
-554.238			-586.64
-446.215			-629.64
-222.271			-629.64
-818.783			-821.813
852.591			-160.536
246.234			-175.782
-566.304			-788.614
-223.987			-807.603
-223.301			-106.82
-240.535			584.461
-240.535			810.051
-492.114			519.379
81.2722			382.435
-192.165			-220.767
171.668			-470.065
-414.844			-492.525
-550.381			-699.505
-201.352			-516.39
-507.527			791.682
-730.388			-482.858
137.592			-637.804
-375.76			636.403
-456.605			-343.399
-605.695			-458.299
-526.67			-642.524
436.866			-330.936
606.557			-406.705
-566.187			723.696
-263.652			-807.294
-415.963			-559.829
-437.08			-598.16
-785.878			-799.981
-217.238			-324.111
-551.773			-310.025
-271.761			-342.184
-360.924			-331.855
-474.664			-403.71
-365.566			-374.37
-425.353			-333.697
-372.205			-345.289
-553.31			290.129
-818.055			-469.809
-391.371			-329.317
-547.209			-502.401
-541.449			-572.26
-669.988			-573.288
-569.103			-745.35
-428.01			-422.28
-809.948			-807.212
-253.369			-578.309
-773.75			-831.593
427.336			-511.627
606.776			-614.012
606.776			-410.369
-338.929			-542.551
-211.639			-280.852
-334.322			-721.186
-569.993			-340.507
-443.095			-456.026
-531.279			-744.895
489.59			-768.283
-586.645			-579.915
-550.088			-383.767
-568.53			512.665
-693.39			-515.75
-558.416			-366.662
-494.977			-595.665
-443.928			-615.387
-387.887			-653.932
-526.353			-549.824
-427.666			-888.508
-340.335			-640.7
-238.101			-572.966
-554.897			-163.261
-520.927			-197.122
-777.59			-586.528
-465.317			-215.717
-708.937			-476.546
-365.093			-189.906
-417.613			-140.161
-382.522			-578.968
-469.074			-173.121
-447.414			-173.013
-501.883			220.249
-370.473			-667.287
-269.961			-217.305
-405.315			-312.672
-387.42			-428.227
-278.689			-219.423
-278.789			-405.663
-131.473			-331.267
-131.473			-591.074
-306.466			-355.233
313.656			-371.341
318.135			297.885
-659.502			-267.713
-663.407			147.233
-527.477			-556.764
-588.693			-740.967
-542.383			-738.207
-604.428			-464.296
-604.428			352.948
-616.598			-476.171
232.141			-506.617
274.965			-552.285
-437.664			-769.387
-174.577			-639.702
-623.483			-568.532
-623.483			-404.841
245.198			-94.9431
245.198			-742.33
-619.369			-438.241
-625.168			-261.176
-307.516			266.599
-206.474			-593.7
-451.139			-695.133
-140.911			-644.872
-324.039			-419.606
-507.717			-629.314
-303.894			-565.825
-736.842			-542.644
-388.806			-353.628
-458.875			-470.581
-585.484			-735.581
-496.785			184.829
-660.237			537.429
-717.83			-326.435
-679.713			-407.362
-757.187			-529.25
-232.531			-454.57
-307.884			-582.297
-134.499			-309.718
-423.71			-248.862
-403.086			-258.493
-365.779			-353.732
-435.374			-496.785
-526.303			-457.427
-301.214			-684.567
-309.469			77.5005
-727.972			-481.351
-477.518			-361.747
-445.623			-670.072
-411.877			-290.851
-417.814			-438.183
-314.465			-237.914
-282.981			-592.929
-290.934			-113.636
-202.112			-146.711
-656.365			-148.825
-271.202			-125.449
-846.161			-65.0375
-732.367			-211.267
-499.24			-63.9217
-577.838			-63.9217
-848.407			716.995
-492.654			-513.864
-331.374			-678.204
-515.543			-330.239
-332.914			414.586
-410.523			558.675
-344.47			-730.438
-423.532			-258.205
-447.812			-363.246
-805.755			-271.224
-826.352			-549.863
-851.963			-690.275
-741.068			-487.836
-318.488			-782.903
-525.113			-440.972
-239.547			342.971
-569.842			-420.461
-881.158			-235.563
723.286			-244.649
-597.494			-269.613
-610.02			206.573
-246.518			-576.087
-360.68			-169.541
-350.648			-612.436
-352.407			-202.305
-295.539			644.603
-462.072			-184.813
-375.175			-453.075
-687.321			-107.484
-674.168			-144.64
-247.355			-241.86
-475.168			-509.82
294.529			-513.649
-631.784			-503.799
-574.483			-498.617
-597.795			-345.542
-319.822			-570.159
-575.654			-533.683
-437.195			252.449
-439.687			252.449
-612.452			-418.114
-509.963			-387.858
-706.828			-391.884
-669.607			-155.569
-566.539			-384.308
302.728			-531.921
-269.059			-632.23
-842.188			-389.797
-579.421			-643.715
753.486			-431.246
-494.177			-244.126
869.025			-726.261
-603.754			-726.261
130.295			-726.261
-511.315			332.174
-278.134			-554.265
-585.051			-761.691
-341.703			-606.341
-334.259			-550.471
370.861			-498.686
-696.783			-547.841
-787.552			-462.717
-523.871			-412.993
-736.632			-373.463
-736.454			-349.196
-852.283			-337.542
-827.412			-388.194
-162.926			-649.864
-343.294			-801.958
-682.92			-811.539
-532.742			-681.831
-404.899			-547.724
242.103			-826.697
422.842			-804.569
-461.674			481.87
-708.621			-399.367
-510.893			-779.608
-412.463			-833.058
-514.619			-521.241
-550.625			-476.229
-455.487			-476.732
-486.863			-798.322
-561.064			-77.8375
-466.45			152.689
-494.856			-382.305
-481.624			307.981
-541.656			-799.612
-549.644			-306.632
-551.07			-579.935
-688.432			-417.051
-243.127			-412.613
-290.087			-373.845
-382.717			-352.168
449.327			-368.715
-368.544			-412.639
-312.536			-255.173
-620.492			-441.333
-762.874			-558.167
-509.439			-681.748
-440.663			-374.665
-299.164			-262.442
-734.803			-334.473
-768.887			-723.624
-839.33			704.918
-366.666			-563.838
-634.59			-809.716
-553.425			-808.404
-598.994			-689.549
-170.24			-551
-175.01			-421.815
301.361			-530.979
-374.222			-680.838
-537.204			-494.257
-576.142			-336.772
-251.121			-655.069
-385.354			-622.813
596.527			449.659
569.941			-674.516
-504.107			845.82
-735.25			-345.643
-529.495			-345.643
-302.631			242.464
-428.656			-428.303
-395.014			531.015
-492.974			-838.488
-288.729			-480.348
-492.859			-697.688
-359.079			-59.7924
-295.345			-64.1077
-243.998			-331.308
-550.656			-563.698
-527.876			-563.698
-344.243			-656.953
-554.509			-570.529
-544.481			-829.026
-410.731			122.039
-288.991			-450.083
-268.11			-821.971
-426.645			422.451
-539.158			-690.363
-386.068			80.4837
-409.257			-423.991
-402.262			-531.882
-260.396			-514.159
-551.527			-482.707
-263.762			-550.237
-495.556			-697.376
-506.973			-632.048
-819.484			-657.049
-452.264			-44.6143
-326.529			-44.6143
-466.592			-225.21
-712.784			-508.008
-512.012			-509.42
-405.377			414.175
-332.351			414.175
-395.229			-840.662
-293.566			-530.169
-401.787			-798.811
-252.676			-584.8
-308.09			-574.877
-585.972			-710.73
-448.654			-731.528
-810.226			-641.471
-847.567			-754.315
-735.613			-760.762
-645.786			-169.794
-674.971			-99.2668
-446.568			-494.511
-109.26			-120.294
-489.93			-120.294
-645.241			-196.353
-592.91			-471.258
-562.009			67.253
-178.008			67.253
-259.384			-281.486
-422.905			-217.784
-111.419			-217.784
-468.751			-417.765
-640.164			-660.066
-140.99			-284.327
-140.99			321.379
-140.99			-525.319
-143.228			-473.96
-107.735			-535.193
729.811			-574.057
-103.491			-408.173
-855.135			-582.916
-208.325			-299.093
-703.916			584.5
-557.103			486.137
-415.844			-234.928
-222.593			-196.688
-296.905			-548.474
-532.017			193.013
-337.551			-471.884
-139.683			212.696
-629.088			-676.079
-846.511			-741.136
-662.284			-657.888
-191.787			-503.265
469.042			-764.364
-604.721			-632.563
318.589			-632.563
-484.214			-632.563
-377.422			-632.563
-321.71			-579.878
196.362			-258.134
-789.793			-258.134
-645.427			-258.134
-729.356			-336.146
-472.248			344.556
-624.364			762.896
-653			-665.099
-584.495			-314.452
514.009			-302.736
-110.378			-475.816
-484.262			-455.584
-431.095			-391.174
-310.547			-765.754
-337.109			-257.914
616.329			-429.127
-360.744			-716.783
205.303			-559.699
-571.896			-661.018
-571.896			-468.178
-571.896			-446.062
-139.323			447.074
-122.826			-247.227
-587.715			-842.392
-243.069			-411.121
-599.443			-493.78
107.175			-785.192
50.5826			729.916
48.2149			-409.563
-267.636			-743.466
-368.758			-858.638
218.807			-842.543
251.148			-786.01
128.103			-434.083
463.519			-490
463.519			-733.617
463.519			-553.633
-235.028			-321.2
-830.193			-494.467
-352.787			-470.558
-473.466			-494.467
-371.042			-382.688
-369.512			237.934
-397.282			236.405
-56.7907			236.405
-231.016			114.51
-471.209			103.855
-499.319			103.855
-609.828			306.734
-417.939			306.734
-251.239			-793.263
-546.93			-143.621
-452.034			-315.653
-488.362			-298.418
-626.965			-227.235
-573.92			-391.994
-573.92			145.675
-655.047			-109.995
-289.286			276.573
-289.286			366.151
-92.8162			248.992
245.122			-212.59
245.122			794.697
-611.266			-174.795
-593.04			-111.764
-428.013			-131.571
282.725			-269.703
312.743			-155.993
-453.069			193.693
-464.426			622.64
203.512			332.802
-309.132			-137.962
-309.132			272.921
-354.777			-611.54
-325.49			-426.484
-325.49			-233.938
-248.919			-551.77
-467.614			-272.441
-340.176			-314.911
-180.78			-518.512
-143.08			-449.156
-430.148			-535.001
-504.055			-253.66
-394.563			352.372
-530.823			-689.373
313.052			-394.49
-293.815			-540.439
-349.323			-227.254
523.474			-259.796
523.474			-115.721
523.474			-478.594
523.474			-510.441
-157.874			-863.925
-157.874			370.8
-57.2068			-282.019
159.417			-147.16
798.225			216.754
166.265			-248.072
497.095			-624.329
885.692			-574.278
-374.83			-296.918
-240.698			-192.573
68.2152			322.147
-689.688			322.147
-333.666			-548.315
114.989			-379.908
-273.343			-647.297
-716.861			-503.828
-306.701			-271.615
-447.848			-142.442
-553.326			-519.767
-305.837			-600.889
-648.179			-361.821
-305.837			-346.397
-428.504			-316.157
-349.46			-236.895
-243.661			210.563
-391.28			-498.049
-451.366			474.284
-286.797			-753.518
-541.948			-500.383
-729.529			-691.211
-244.408			-172.078
-474.847			-491.527
-488.712			-727.51
-414.767			-738.147
-471.379			-648.608
-617.457			-504.619
-683.977			-845.934
-831.508			-731.302
-557.187			-654.603
-348.708			427.963
261.987			-585.757
-420.044			-517.125
-651.187			-441.421
444.25			86.1709
-357.938			-484.605
-544.038			-737.058
-487.485			-424.049
-636.504			-304.673
-636.504			-207.193
-151.277			667.233
-148.231			-742.233
-258.039			-634.22
-235.941			-568.861
-171.719			-616.634
-171.719			-866.217
-321.472			-131.894
-143.246			-131.894
-279.734			-158.838
141.25			-254.621
-242.937			-532.582
-597.134			-532.582
-566.784			-532.582
[truncated: 296 more rows]
