# Supplementary material for: Multiple time-scales of decision-making in the hippocampus and prefrontal cortex
Source: eLife. 2021 Mar 8;10:e66227. doi: 10.7554/eLife.66227 (PMC7993991; doi:10.7554/eLife.66227)
Supplement: Figure 5—source data 1. [file elife-66227-fig5-data1.xlsx]

## Sheet: CSI
PFC IN	PFC OUT		CA1 IN	CA1 OUT
0.00752057	0.125362		-0.0791098	-0.262786
0.188387	-0.159338		-0.264259	0.191212
-0.156329	-0.0522601		0.30807	-0.346143
0.0112331	-0.0871025		0.462516	-0.210561
0.416773	0.342187		-0.100826	-0.0116857
0.213599	0.684283		-0.0392988	-0.00514212
0.0368057	-0.0357601		0.131601	-0.10377
-0.236355	0.156797		0.180402	-0.0183475
0.368388	0.448458		0.145836	0.071136
0.45071	0.717765		-0.0720142	-0.201588
0.153821	0.0664968		-0.135928	-0.228045
-0.0624062	0.0544311		-0.42486	-0.152051
0.594267	-0.0180744		-0.163963	0.115719
0.49581	0.517478		-0.194124	0.379889
0.165703	0.675103		-0.0743134	-0.133848
0.608016	-0.358921		-0.292439	-0.217802
0.408784	-0.0554867		0.0520426	-0.405115
0.177823	0.0850028		-0.226106	-0.171402
0.1129	0.473414		-0.0671521	-0.357844
0.625866	0.718102		-0.212557	-0.229473
0.540557	0.132596		-0.0464296	-0.071769
0.166619	-0.0193947		-0.108612	-0.211119
0.117195	-0.0890754		-0.211239	-0.0865271
0.756056	0.50003		-0.050852	-0.0855409
0.510382	0.683031		0.077459	0.455936
0.0505036	0.0746313		-0.419999	0.728269
-0.0574306	0.29537		0.0507668	0.196494
0.401153	0.362495		0.153549	-0.0980944
0.652476	0.678984		0.450706	-0.185296
0.442999	0.248103		-0.122684	0.130713
-0.0949153	0.129958		-0.107925	-0.116893
-0.176156	0.421398		-0.0867392	-0.11701
0.339816	0.652095		-0.0242061	-0.188576
-0.0851521	0.0101333		0.260161	-0.156449
-0.0573377	0.095218		0.11206	-0.0987577
0.194261	0.166934		0.322547	0.103167
-0.124838	-0.266531		-0.273397	-0.0762117
-0.18897	-0.190083		-0.28658	-0.24202
0.530745	0.278314		-0.185331	-0.163019
-0.126213	0.38043		-0.239552	-0.203028
0.37683	-0.146035		0.0195263	-0.294561
-0.198845	0.372189		-0.105837	-0.0709522
-0.331988	0.36897		-0.174013	-0.236412
-0.113564	-0.119431		0.0157037	-0.394473
0.302191	-0.0958691		-0.367221	0.114255
-0.12361	-0.309968		-0.207617	-0.278261
-0.125283	0.330934		-0.203022	-0.509832
-0.168486	0.42463		-0.36944	-0.206428
0.257708	0.399093		-0.307725	-0.105213
0.117642	-0.0741674		-0.17836	-0.170538
-0.287172	0.427603		-0.115058	-0.399539
-0.273328	0.377228		-0.438249	-0.238688
0.419288	-0.185833		-0.317138	-0.0975325
0.228959	-0.198447		-0.197383	-0.357022
0.291227	0.445884		-0.081663	0.0669574
0.0905852	0.525321		-0.0217679	0.031619
0.149724	-0.169074		-0.362473	-0.211086
0.00581843	-0.111188		0.10778	-0.0432853
-0.197296	0.125665		-0.0998944	0.0613109
-0.0622148	0.675901		-0.139325	-0.0970057
-0.0388509	0.670135		-0.180303	-0.187347
0.300491	0.165534		-0.0472154	-0.244628
-0.246303	0.23334		0.0122355	-0.10899
0.380204	-0.2051		0.301444	-0.0883845
0.356624	-0.204546		-0.281393	0.0853169
0.362373	-0.162455		-0.172048	-0.116814
0.393607	-0.0808427		-0.129891	-0.282228
0.00203989	0.179354		-0.187561	-0.100746
0.331093	0.294932		-0.0629275	-0.11793
0.47971	0.336951		-0.0589828	-0.187291
0.378345	0.312584		-0.0508234	0.0236803
0.279615	0.381335		-0.337952	-0.152183
-0.109503	0.00969146		-0.140525	-0.208433
0.39428	-0.0618457		-0.158221	-0.221973
0.405629	0.323601		-0.341565	0.207346
0.413119	0.437301		-0.132356	-0.44257
0.306282	0.33369		-0.0797333	-0.0041839
0.371211	0.381792		-0.261836	-0.290401
0.530854	-0.0437318		-0.219006	-0.311595
-0.105647	0.370015		-0.188106	-0.0721793
-0.361079	0.320283		-0.110749	-0.100869
-0.0306354	0.425006		-0.148037	-0.465859
-0.277445	0.353547		-0.216342	-0.233301
-0.070284	0.438086		-0.174994	0.125825
-0.0342669	0.354385		-0.032164	0.0357664
0.144752	-0.245709		-0.113732	-0.39229
0.322822	-0.0540013		-0.241256	0.0289681
0.265396	-0.751287		-0.20024	-0.0907708
-0.142627	0.399374		-0.466182	-0.0898441
-0.0383607	-0.256623		-0.186969	-0.401446
-0.0063399	-0.0310012		-0.1319	-0.195943
-0.474811	-0.0712316		-0.0147239	-0.157294
-0.27753	-0.49505		0.0645961	-0.0650304
0.0108872	0.236429		-0.290379	0.120768
-0.0429457	0.154753		-0.0893445	0.295783
0.370142	0.310746		0.0181044	-0.0517096
0.272007	-0.305308		-0.170259	-0.142663
0.066684	0.286266		-0.0470613	-0.0684758
0.116076	-0.0271778		0.574845	-0.475323
0.310215	-0.149386		-0.164192	-0.0670308
0.0631106	0.173114		-0.11843	-0.286751
-0.321178	-0.142316		-0.185776	-0.35753
-0.403707	-0.0699835		-0.246215	-0.203907
-0.0404023	-0.0615179		-0.265202	-0.149663
0.00242102	0.107774		-0.421336	-0.254829
-0.104562	-0.0783316		-0.100448	-0.388767
-0.84679	-0.0306201		-0.296222	-0.0861702
-0.315151	0.17962		-0.112253	-0.125906
0.238402	-0.154537		0.0781096	-0.380747
0.146405	0.156035		-0.375336	-0.0378083
-0.175155	-0.0755095		-0.277084	-0.322513
-0.228495	-0.160626		-0.280918	-0.105093
0.22494	0.0400253		0.191427	0.0143185
0.332714	-0.14918		-0.166024	-0.0304415
-0.693887	-0.480244		-0.155578	-0.176473
-0.454047	-0.235247		-0.324536	-0.081474
0.0778911	-0.142133		-0.0894553	0.440218
-0.0588525	-0.0355137		-0.0493095	-0.164233
-0.0403345	-0.0483718		-0.0652739	0.0626179
-0.331191	-0.519768		0.0773205	0.335585
-0.0362651	0.126036		-0.511649	-0.045712
-0.277734	-0.233465		0.0152286	0.07615
0.431531	-0.161948		-0.226301	-0.133389
0.214945	-0.0778994		-0.0391481	-0.119208
-0.120771	0.0616182		-0.0245369	-0.340332
-0.153709	-0.108499		-0.0496638	-0.13789
0.210622	-0.0461014		-0.0429513	-0.134927
0.168164	0.631556		0.343455	-0.229029
-0.262989	-0.538043		0.0370419	-0.190526
-0.038381	-0.0733202		-0.140223	-0.168203
-0.826756	-0.0382319		-0.0624147	0.021549
-0.448003	-0.570331		-0.0859393	-0.05706
0.441724	-0.883732		-0.154961	-0.13392
0.134263	-0.595526		-0.111396	-0.246982
-0.11682	-0.299127		-0.166616	0.0873186
-0.3958	0.0464346		0.0170298	0.00586252
-0.0319739	0.306365		-0.102336	0.269238
0.191877	-0.288729		-0.0325819	-0.146301
0.201886	0.106546		-0.0450278	-0.134173
-0.431518	0.0528772		-0.160609	-0.156338
-0.0461758	-6.05962e-05		-0.315027	-0.051517
-0.0118187	-0.334553		-0.240897	-0.162196
-0.36235	-0.4092		-0.124616	0.134807
-0.23095	-0.0489351		-0.126046	0.0490331
0.0862341	0.0405283		-0.153104	0.101165
0.409191	-0.107385		0.0487215	0.0848779
0.107403	0.076379		-0.412021	0.300282
-0.108522	-0.0373345		-0.203665	0.102665
0.246676	-0.0952114		-0.13338	-0.411471
0.293299	-0.193378		-0.0167698	-0.12292
-0.0300122	-0.0284471		-0.140355	0.0189687
-0.289251	-0.0603857		-0.0769958	-0.117893
-0.0280602	0.31568		-0.271056	-0.364796
-0.0516075	-0.305125		-0.120179	-0.245573
0.42325	0.0339475		-0.151912	-0.121311
-0.0580069	0.168986		-0.102929	-0.152758
-0.501248	-0.159658		-0.0319689	-0.211383
0.057705	0.00979973		0.0407176	0.437285
0.0734336	-0.0107797		-0.251948	-0.217406
0.346935	0.0395104		-0.0922333	0.193402
0.0910524	-0.143438		-0.201905	-0.178179
-0.112231	0.240012		-0.0756225	-0.143702
0.0233484	-0.307362		0.209331	-0.187603
-0.027177	-0.0300315		-0.297673	-0.193651
-0.0593529	-0.101664		-0.449508	-0.222044
-0.0873964	0.344283		-0.087477	-0.327998
0.287747	-0.472842		-0.177304	0.0419233
-0.363309	-0.639125		-0.132873	-0.273363
-0.0236254	-0.0293951		-0.238857	-0.207786
0.24049	0.168101		-0.174675	-0.072209
-0.0658412	-0.108854		-0.263317	-0.0874319
0.34883	-0.0115526		-0.0526456	-0.189267
-0.431087	0.0813427		-0.0119515	-0.24458
-0.430161	-0.0331957		-0.151369	0.134047
-0.156526	-0.0460788		0.026407	-0.172473
0.381316	-0.0297177		-0.229426	-0.358295
0.254765	0.310674		-0.0993958	-0.403535
-0.0293732	-0.715112		0.010752	-0.215799
	-0.485685		-0.108976	0.197034
	0.0966578		-0.0218453	-0.0820281
	0.199614		0.323411	-0.196588
	-0.151843		-0.152688	-0.29275
	0.146719		-0.485021	0.0395909
			-0.0826281	0.254309
			-0.0977837	-0.245996
			0.357966	-0.138748
			-0.148786	-0.448037
			-0.0220812	-0.19038
			-0.197811	-0.0341393
			-0.167141	-0.596748
			-0.245409	-0.0798401
			-0.245626	-0.135373
			-0.248614	-0.210798
			-0.0412483	0.0594554
			-0.100079	-0.262872
			-0.0879987	-0.100367
			0.257577	-0.305815
			-0.353023	-0.262205
			-0.254667	0.047679
			-0.135418	-0.434552
			-0.0564389	-0.19115
			-0.0203371	-0.186456
			-0.0250124	-0.216753
			0.0680736	-0.103065
			-0.143403	-0.101049
			-0.222472	0.0884257
			0.0301245	-0.00967655
			-0.31627	0.250221
			-0.0393997	-0.271282
			-0.202171	-0.131938
			-0.250466	0.157149
			-0.221407	0.0798665
			-0.276704	-0.0489121
			-0.330577	-0.193893
			-0.178284	-0.185741
			-0.426603	-0.272109
			-0.337783	-0.0302145
			-0.0723671	-0.0837653
			-0.218394	-0.148039
			-0.510796	-0.168361
			0.0566483	-0.229963
			-0.385959	-0.127436
			-0.163886	-0.269876
			-0.15371	-0.111295
			-0.127676	0.595032
			-0.269318	-0.304495
			-0.170325	-0.155204
			-0.270752	-0.207965
			-0.164274	-0.118662
			-0.126211	-0.0103804
			-0.272528	-0.209573
			0.289493	-0.274003
			-0.159741	-0.329465
			-0.241712	-0.256658
			-0.208677	-0.53098
			-0.184115	-0.288022
			-0.108205	-0.0943925
			-0.188418	-0.209645
			-0.160464	-0.342881
			-0.209151	-0.181645
			-0.267328	-0.143419
			-0.378555	0.0103027
			-0.22481	0.862752
			-0.333597	0.343878
			-0.461395	-0.234718
			-0.145038	0.0612805
			-0.426448	-0.255407
			-0.148141	-0.312918
			0.3122	-0.245715
			0.140041	-0.179062
			-0.200318	-0.468511
			-0.0843321	0.16361
			-0.335445	-0.137493
			-0.206753	-0.159097
			-0.314934	-0.234982
			-0.290761	-0.33464
			0.052189	-0.270715
			-0.103637	-0.162692
			-0.0959317	0.0883413
			-0.198285	-0.145258
			0.195629	-0.123534
			0.152993	0.294537
			-0.246953	-0.263245
			-0.302677	-0.155217
			0.076545	0.209035
			0.0759719	-0.0135056
			-0.193524	-0.0904629
			-0.268527	0.0652143
			-0.0203289	-0.340144
			-0.256657	-0.0347188
			-0.167426	-0.261275
			-0.118946	-0.349213
			-0.223164	-0.307913
			-0.192412	-0.0513904
			0.0187148	-0.316566
			0.537454	-0.279633
			-0.20594	0.0274242
			-0.240189	0.0306934
			-0.183707	-0.0649589
			-0.17709	-0.240744
			-0.067445	-0.0364775
			-0.191682	-0.143156
			-0.113378	-0.181406
			-0.147114	-0.34455
			0.642259	-0.143882
			-0.224243	-0.183595
			0.0416702	-0.168021
			-0.21074	-0.188608
			-0.293932	-0.316642
			-0.241034	-0.213792
			-0.144089	-0.345107
			-0.0596233	-0.294406
			-0.290957	-0.0950673
			-0.124789	-0.321679
			0.411171	-0.170848
			0.0182989	-0.084518
			0.17264	0.0439476
			0.341743	0.00780847
			-0.253541	0.0581846
			-0.191268	-0.308748
			-0.244167	-0.233476
			-0.0385724	-0.292612
			-0.0234068	-0.239211
			-0.195971	-0.565919
			-0.226924	-0.00208562
			-0.182058	-0.11288
			-0.113147	-0.210689
			-0.119391	-0.307141
			0.105397	-0.259086
			-0.214327	-0.0494793
			0.0726458	-0.0942975
			0.110212	-0.109115
			0.023799	-0.156014
			0.44657	-0.323245
			-0.115101	0.121459
			-0.320152	-0.278214
			-0.297182	-0.184172
			-0.10058	-0.368158
			-0.0133891	0.101846
			-0.240737	-0.373592
			-0.198862	0.338975
			0.190397	-0.0737572
			0.0915886	-0.492122
			-0.0203144	-0.00479407
			-0.167223	-0.0893604
			-0.398707	-0.196059
			-0.31127	-0.336756
			-0.0220608	-0.277056
			-0.325231	-0.158584
			-0.180747	-0.0483674
			-0.288933	-0.243545
			0.122318	-0.320532
			-0.190718	0.103629
			-0.371342	-0.180909
			0.0469551	-0.128388
			-0.157014	-0.0889952
			0.0974564	-0.37516
			-0.317767	-0.470564
			-0.457203	-0.379258
			0.106284	-0.396671
			-0.220086	-0.144145
			0.0152252	-0.296857
			0.0428789	-0.192145
			-0.372355	-0.212845
			-0.00965833	-0.0764827
			-0.198034	0.062459
			-0.344274	-0.0320736
			-0.293846	-0.0748102
			-0.169489	-0.192766
			-0.0299281	-0.0360614
			0.0203087	-0.323928
			-0.29584	-0.0734094
			-0.00994262	-0.234052
			-0.332962	-0.148141
			-0.0663355	-0.0600116
			-0.117233	-0.10285
			-0.0869934	-0.313281
			-0.255267	0.354801
			-0.0798553	-0.0250706
			-0.0665164	-0.217398
			-0.0507443	-0.111777
			-0.0336763	-0.350018
			-0.0997276	-0.332171
			-0.021399	-0.285135
			-0.26537	-0.101169
			-0.359991	-0.201064
			-0.177551	-0.2318
			-0.0496213	-0.140546
			-0.141289	0.607103
			-0.220471	-0.283457
			-0.233859	-0.122849
			-0.0738931	-0.214282
			-0.102922	-0.268592
			-0.273964	-0.295279
			-0.275561	-0.0940942
			-0.0235846	-0.263193
			-0.3664	-0.307686
			-0.319388	0.195575
			-0.388943	0.24036
			-0.223253	-0.226397
			-0.233307	-0.521269
			-0.22853	-0.192001
			-0.272809	-0.205688
			0.119198	-0.264418
			-0.0929153	-0.223668
			-0.380705	0.316081
			-0.0544086	-0.0828949
			-0.18519	-0.436471
			-0.118823	-0.274336
			-0.256198	-0.291553
			-0.113939	-0.0939398
			-0.150178	-0.210199
			-0.156751	-0.135919
			-0.183468	-0.0774263
			-0.110625	-0.101293
			-0.238324	-0.13307
			-0.0646779	-0.289666
			-0.100495	-0.251475
			-0.254828	-0.199231
			-0.286819	-0.125094
			-0.206546	0.104205
			-0.40621	-0.0755666
			-0.229629	-0.210102
			-0.373656	-0.196485
			-0.153585	-0.249698
			-0.248606	-0.263757
			-0.0491019	-0.220074
			-0.341212	-0.140872
			-0.283558	-0.57251
			-0.0250774	-0.0938481
			-0.212248	-0.237431
			-0.179434	-0.601001
			-0.185726	-0.314124
			-0.0847647	-0.23655
			0.065405	-0.191113
			-0.275594	-0.342347
			-0.138517	0.0643854
			-0.100612	-0.165253
			-0.355781	-0.284369
			0.0893552	-0.217947
			0.089323	-0.353769
			-0.298354	-0.209845
			-0.266112	-0.16608
			-0.222761	-0.16423
			-0.15858	-0.213178
			-0.387944	0.0222991
			-0.0866257	-0.0138139
			-0.125921	-0.271349
			-0.18904	-0.0715104
			-0.27579	-0.145401
			-0.325995	-0.148859
			-0.217129	-0.173199
			-0.332383	-0.117192
			-0.169748	-0.0645484
			-0.0526512	-0.189327
			0.0241122	-0.123685
			-0.130347	-0.418627
			-0.309042	-0.0279622
			-0.277123	-0.126845
			-0.325089	-0.262649
			-0.208485	-0.250958
			-0.267051	-0.242443
			-0.373196	-0.089955
			-0.193726	-0.175916
			-0.141748	-0.194204
			-0.113197	-0.14587
			-0.193089	-0.0709582
			-0.343984	-0.0748655
			0.30856	-0.362454
			-0.042954	-0.273066
			-0.0467398	-0.290863
			-0.167179	-0.196001
			0.210805	-0.241698
			-0.230733	-0.328118
			-0.334712	-0.574016
			-0.364072	-0.227174
			-0.281722	-0.155564
			-0.46025	-0.100591
			-0.441877	-0.305715
			-0.110701	-0.312481
			-0.293431	-0.0520404
			-0.127505	-0.361125
			-0.0768058	-0.144813
			-0.307015	-0.139372
			0.0751846	-0.108141
			-0.213433	-0.211998
			-0.371272	-0.178534
			-0.125638	-0.089663
			-0.332501	-0.146692
			-0.130198	-0.0673053
			-0.200579	-0.19368
			-0.133544	-0.0211837
			-0.246312	-0.209499
			-0.38309	-0.0278646
			-0.260628	0.0342161
			0.0176469	0.0832779
			-0.00466365	-0.535595
			-0.0652066	0.0768706
			-0.160563	-0.146429
			0.0874218	-0.156877
			-0.142347	-0.260806
			-0.0351525	-0.203906
			-0.10063	-0.305743
			-0.169921	-0.283746
			-0.107332	-0.147418
			-0.235405	-0.252958
			-0.147192	-0.224566
			-0.286294	-0.0267609
			0.147955	0.017614
			-0.0265407	0.11652
			0.0771358	-0.352991
			-0.104088	-0.141095
			-0.196823	-0.250833
			-0.197327	-0.102828
			-0.166643	-0.0615656
			-0.214207	-0.0312935
			-0.184088	-0.18651
			-0.219326	-0.12395
			0.0241421	-0.20866
			-0.213577	-0.116214
			-0.117035	0.0107802
			0.0241807	0.197743
			-0.0174832	-0.0220078
			0.0812612	-0.162039
			-0.172769	-0.253966
			-0.0847292	-0.316096
			-0.235277	-0.0666532
			-0.0910159	-0.234049
			-0.237493	0.0381995
			-0.269693	-0.179755
			-0.0713504	-0.151006
			-0.191269	-0.221797
			-0.121094	-0.137473
			-0.266528	-0.186849
			-0.198476	0.0608063
			-0.174031	0.0498577
			0.193169	-0.126373
			-0.200627	-0.240459
			-0.0770121	-0.188455
			-0.363427	0.157143
			-0.0158594	-0.173267
			-0.17673	-0.196579
			-0.0310167	-0.0988086
			-0.203079	-0.0942158
			-0.181951	0.0520394
			-0.251441	0.0191954
			-0.128314	-0.036763
			-0.165335	-0.108066
			-0.106821	-0.0704064
			-0.20027	0.28412
			0.0993864	0.202322
			-0.0902397	-0.0628559
			-0.170985	-0.0524797
			-0.000742646	-0.286912
			-0.459177	-0.0391679
			-0.141014	-0.0466653
			-0.0749491	-0.0532126
			-0.242223	-0.115303
			-0.157814	-0.0219906
			0.201598	-0.137688
			0.0348163	0.0885312
			-0.117543	-0.264823
			-0.112042	-0.329817
			-0.359854	-0.207332
			-0.399246	0.112757
			-0.188389	-0.084455
			0.152143	-0.0311062
			-0.0402383	-0.01508
			-0.101386	-0.179925
			0.0935069	0.219352
			-0.405609	-0.165277
			-0.0571037	-0.183038
			-0.100767	-0.183885
			-0.176495	-0.16264
			-0.304704	-0.00141847
			-0.155584	0.115435
			-0.0940122	-0.262568
			-0.0744411	-0.0218473
			-0.307564	0.00959781
			0.0362354	-0.0810793
			0.0715649	-0.102551
			-0.0990851	-0.0980902
			-0.192258	-0.427726
			0.143933	-0.0343165
			-0.2593	-0.132488
			-0.16572	0.0149378
			0.026422	-0.224084
			-0.407701	-0.233172
			-0.279235	-0.116005
			-0.103052	0.313869
			-0.0306188	-0.300524
			-0.0776751	-0.108264
			-0.123492	-0.403181
			0.0444605	-0.135071
			-0.00347425	0.312849
			-0.127693	-0.267524
			-0.132216	-0.359235
			-0.0901848	-0.0300943
			-0.0773222	-0.0633997
			-0.338418	-0.220089
			-0.168888	-0.165229
			-0.0126496	-0.171383
			-0.263304	-0.133225
			-0.216098	-0.118901
			0.0250461	0.0248496
			0.0300764	-0.157668
			-0.0914481	-0.207461
			-0.400232	0.416433
			-0.0515528	-0.303037
			-0.0853083	-0.25965
			-0.269268	-0.0277888
			-0.153993	-0.0904053
			-0.102959	-0.172489
			-0.130832	-0.255624
			-0.0521053	-0.136192
			-0.212221	-0.0095604
			-0.114648	-0.318211
			-0.0252271	-0.173695
			-0.278608	-0.134975
			-0.0465205	-0.183924
			-0.173873	-0.175105
			-0.0864236	-0.073813
			-0.180453	-0.0456858
			-0.129719	0.0374664
			-0.06388	-0.0999269
			-0.545344	-0.00928132
			0.25174	0.337428
			-0.423798	-0.107389
			-0.369298	-0.0892013
			-0.133852	-0.248557
			-0.185254	0.220411
			-0.330125	-0.180782
			-0.180832	-0.0529429
			-0.0931317	0.0379757
			0.0195112	-0.288619
			-0.113345	0.214258
			-0.194927	-0.185661
			-0.305214	-0.164295
			-0.254524	-0.215048
			-0.30657	-0.111226
			-0.387005	-0.0219142
			-0.103722	-0.203461
			-0.128847	-0.101379
			-0.00809583	-0.232871
			0.012288	-0.232532
			-0.097166	-0.0986219
			-0.26296	-0.0528495
			0.121588	0.181332
			-0.102681	-0.335719
			-0.154032	-0.157855
			-0.383461	0.129089
			-0.177676	-0.242151
			0.209569	-0.100973
			-0.433592	-0.0445701
			-0.21873	0.0234259
			-0.0535866	-0.00312496
			-0.240833	-0.143657
			-0.251344	-0.0695004
			-0.384119	0.0538581
			-0.0968506	-0.418694
			-0.127509	-0.0915878
			0.237946	0.648922
			-0.168234	0.0759917
			-0.0896514	-0.152251
			-0.282166	0.136257
			-0.322285	0.114917
			-0.111376	-0.395948
			-0.292525	-0.297137
			-0.116028	-0.0493161
			-0.351402	0.0794871
			0.0785845	0.0290539
			0.207533	0.137254
			0.0670196	-0.229309
			0.180695	-0.141199
			-0.127676	-0.192699
			-0.0301492	0.0803834
			0.180766	-0.11504
			0.0234509	-0.0864073
			-0.756501	-0.0896556
			-0.468429	-0.138199
			-0.0528209	-0.0908325
			-0.0450455	-0.0622048
			-0.110218	-0.359783
			0.0476076	-0.210148
			-0.15449	-0.475605
			0.0494662	-0.214201
			0.0365218	-0.190987
			0.667974	-0.191285
			0.127615	-0.202587
			0.381403	-0.259958
			-0.0060409	0.0499992
			0.275646	-0.121021
			0.356028	-0.0386173
			-0.062837	-0.0240859
			-0.189826	-0.428234
			-0.233107	0.0688055
			-0.520477	0.071633
			-0.0163964	0.12832
			-0.0972423	0.151961
			0.0586971	-0.267057
			-0.121051	-0.216772
			0.0454904	-0.301186
			-0.172571	-0.1036
			0.0850947	-0.317254
			-0.362341	0.0650477
			-0.151037	-0.026115
			-0.219921	-0.327016
			-0.231594	-0.115307
			-0.0156864	-0.191889
			0.0178798	-0.199757
			-0.033769	-0.290464
			0.147782	-0.0562447
			0.0877307	-0.0878744
			-0.0875371	0.0345342
			0.0334514	-0.0721577
			-0.0105426	-0.0478851
			0.106164	-0.127394
			-0.216151	-0.367481
			-0.255272	0.0013691
			-0.0911078	-0.0575079
			-0.253893	-0.106461
			-0.210812	-0.0953719
			-0.192371	0.0777742
			0.0443902	-0.112867
			-0.273363	-0.297067
			-0.123454	0.245573
			-0.0347597	-0.0360341
			-0.168711	-0.146824
			-0.174404	-0.122122
			0.360408	-0.0996394
			0.0193125	-0.0928154
			-0.0435154	0.179687
			-0.0994011	-0.0661702
			0.0274419	-0.373332
			0.017167	0.0906017
			-0.256473	-0.16881
			0.0428736	-0.0688369
			-0.0634853	-0.196497
			-0.219488	-0.0520079
			-0.248662	-0.0866726
			-0.0631396	-0.284444
			-0.0475645	-0.0630575
			-0.255188	0.447284
			-0.233633	-0.202979
			0.107724	-0.350251
			-0.108571	0.0932112
			-0.195084	-0.119573
			-0.0758647	-0.124133
			-0.165169	0.2077
			0.139222	-0.367998
			-0.277406	-0.357514
			-0.299545	-0.210126
			-0.167298	-0.0939765
			-0.127698	0.169432
			-0.141909	-0.156117
			-0.171533	0.035111
			-0.199646	-0.235908
			-0.358906	-0.380669
			-0.43719	-0.0609333
			-0.240488	-0.124605
			-0.139265	-0.0663623
			-0.244846	-0.14542
			-0.116835	-0.0385233
			-0.128979	0.110907
			-0.1001	-0.182821
			-0.0759045	-0.326456
			0.338887	-0.0845969
			-0.101216	-0.424465
			-0.18615	-0.0586451
			0.200177	-0.127736
			-0.0197078	0.0902441
			-0.16716	-0.405882
			-0.0528718	-0.188443
			-0.256452	-0.125752
			-0.355009	-0.0493188
			-0.445679	-0.140492
			-0.141683	-0.278683
			0.370565	-0.331934
			-0.47958	-0.171545
			-0.260399	0.177213
			-0.145569	-0.0393128
			-0.124502	-0.00133084
			-0.265446	-0.158676
			-0.262821	-0.342626
			-0.333128	0.177589
			-0.2092	-0.398973
			-0.170134	0.0230049
			0.0953109	-0.00843906
			-0.246766	-0.00825577
			-0.289771	-0.154924
			-0.166498	-0.219922
			-0.171967	-0.257915
			-0.299733	-0.115373
			-0.210424	-0.0370411
			-0.501121	-0.318577
			-0.0939862	0.0514016
			-0.09158	-0.256388
			-0.0675118	0.0472569
			-0.196149	0.0745855
			-0.15031	-0.36174
			-0.133943	0.0312761
			-0.118255	-0.417184
			-0.258429	-0.165978
			-0.275869	0.171422
			-0.0847544	-0.179127
			-0.107564	0.10386
			0.374	-0.335222
			-0.0950199	-0.37727
			-0.171682	-0.180097
			-0.185125	-0.118275
			-0.100172	-0.278041
			-0.223908	-0.168608
			-0.21949	-0.192739
			-0.248125	-0.203716
			-0.163453	0.557938
			-0.179443	0.132081
			-0.0648529	0.0184939
			-0.179256	0.156293
			-0.131494	0.159369
			0.11226	-0.185182
			-0.286142	-0.202794
			-0.164721	-0.197515
			-0.238134	-0.0302823
			-0.194286	-0.225034
			-0.169752	-0.24062
			-0.172943	-0.342865
			-0.224868	-0.233593
			-0.237444	-0.256041
			-0.0854889	-0.199675
			-0.142592	-0.348758
			-0.288721	-0.21668
			-0.22228	-0.296919
			-0.156012	-0.18319
			-0.214159	0.284378
			0.0225332	0.209454
			-0.144073	0.0162289
			-0.125799	-0.106113
			-0.329444	-0.0997722
			-0.00268726	0.064534
			0.0184477	0.328388
			0.100414	-0.202928
			-0.00588866	-0.200408
			-0.136224	0.116658
			-0.0790528	-0.384833
			0.0547924	-0.400918
			-0.236002	-0.0329495
			-0.468561	0.184687
			-0.214396	-0.0294916
			0.0105944	-0.174468
			-0.225379	-0.196694
			0.0316772	0.0303909
			-0.0924222	-0.126356
			-0.100752	-0.176512
			-0.428794	-0.113681
			-0.0675777	-0.31518
			-0.155309	-0.266402
			0.0698285	-0.183272
			-0.182822	-0.0270079
			0.410843	-0.15948
			-0.29693	-0.253693
			-0.443445	-0.221167
			0.0475186	-0.0486587
			-0.395838	-0.235887
			-0.219357	-0.167616
			-0.1708	0.157151
			-0.0545715	-0.16643
			-0.0454156	-0.130536
			-0.00533641	0.0612641
			-0.113195	0.0549677
			-0.31762	-0.227842
			-0.187463	-0.0145608
			-0.169576	-0.19871
			-0.283863	-0.205789
			-0.153172	-0.138123
			-0.240579	-0.242962
			-0.29537	-0.147644
			-0.103894	-0.0160589
			-0.177704	-0.134899
			-0.209592	-0.313801
			-0.194767	-0.163024
			-0.153847	-0.0985327
			0.0129419	-0.206856
			-0.0856856	-0.195822
			-0.146452	-0.284136
			-0.102983	0.37931
			0.357137	-0.195321
			-0.502885	-0.262189
			-0.107762	0.0162355
			-0.0828087	-0.147016
			-0.0609539	0.32334
			-0.2062	-0.452927
			-0.289552	-0.440166
			-0.334033	-0.075759
			-0.221869	-0.028628
			-0.321753	0.351844
			0.0777172	-0.184732
			-0.0249199	-0.19263
			-0.286498	-0.340546
			-0.220861	0.0561397
			-0.252973	-0.248693
			-0.0510419	-0.357417
			-0.105889	-0.0623785
			-0.20044	-0.265334
			-0.095588	-0.090653
			-0.173692	-0.186494
			-0.434413	-0.20197
			-0.143434	-0.346216
			-0.26783	-0.0356548
			-0.145577	-0.125558
			-0.221194	-0.0419152
			-0.0627049	-0.167235
			0.311435	-0.109731
			0.0106491	-0.14456
			0.0134128	-0.237572
			-0.182522	-0.261404
			-0.24398	-0.179265
			-0.0760198	-0.278196
			0.0255725	-0.201239
			-0.0913531	-0.419337
			-0.130561	-0.189933
			0.266507	-0.174694
			-0.143264	0.046052
			-0.185088	-0.220565
			-0.145752	-0.045937
			-0.0772543	-0.170983
			-0.246401	-0.329838
			-0.394766	-0.167313
			-0.23493	-0.101364
			-0.145525	0.00344529
			-0.145486	-0.0810079
			-0.213397	-0.429701
			0.376925	-0.275499
			-0.070096	-0.228425
			-0.0222022	-0.330561
			-0.137553	0.070094
			-0.372945	-0.0121623
			-0.224261	-0.37085
			-0.181113	-0.233991
			-0.334171	-0.224675
			-0.277434	-0.165846
			-0.112253	0.0901344
			-0.177169	-0.139849
			-0.0711488	-0.17513
			-0.257492	-0.134806
			-0.0890093	-0.00152532
			-0.117863	-0.21835
			0.0616045	-0.218996
			-0.0889664	-0.161366
			-0.339448	-0.187995
			-0.157885	-0.148424
			-0.155003	-0.312468
			-0.183492	-0.344312
			-0.255924	0.120391
			-0.23591	-0.100332
			-0.00297491	-0.134274
			-0.225298	-0.191487
			-0.144391	-0.068034
			0.103245	-0.0500838
			0.0544502	-0.179859
			-0.0801647	-0.288442
			-0.0687116	0.15995
			-0.118083	0.159706
			-0.172138	-0.100062
			-0.182656	-0.0265938
			-0.23093	0.0369446
			-0.163829	-0.0189566
			-0.180582	-0.0741664
			-0.124335	-0.184199
			-0.380909	-0.188143
			-0.0743953	-0.226717
			-0.160302	-0.176154
			0.0492262	-0.157649
			-0.0539671	-0.285091
			-0.195848	0.0187138
			-0.0739221	-0.032132
			0.16904	0.0977021
			0.0243264	-0.0744111
			-0.05052	0.0153265
			-0.313846	-0.12074
			-0.15873	-0.39456
			-0.0835192	-0.214443
			-0.255172	-0.0422695
			0.000514931	-0.508353
			-0.173856	0.327565
			-0.13102	-0.263573
			0.135685	-0.152116
			-0.10883	0.104572
			-0.114449	0.184742
			-0.0495334	-0.180157
			-0.194909	-0.111937
			-0.172372	-0.120815
			-0.30835	-0.262879
			-0.162303	-0.201586
			-0.115642	-0.2381
			-0.0243979	-0.302097
			0.178128	-0.0384848
			-0.146022	0.0415712
			-0.0489223	-0.0578306
			0.0109406	-0.305534
			0.0495788	0.202965
			-0.0559278	-0.107369
			0.0528486	-0.339575
			-0.186205	-0.272378
			-0.324261	-0.120875
			-0.0903059	-0.0961627
			0.0582244	-0.277517
			-0.230021	-0.256521
			-0.0477654	0.244695
			-0.292718	0.0598066
			-0.387667	0.100399
			-0.170182	0.26298
			-0.300498	-0.0892399
			-0.406003	-0.013845
			0.261159	0.177915
			-0.148631	-0.0646947
			0.0301769	-0.224823
			-0.281445	-0.178404
			0.450943	0.0328095
			-0.412873	-0.135429
			0.0507563	-0.259589
			-0.202552	-0.109254
			-0.0822575	-0.325954
			-0.171075	0.123308
			-0.365283	0.0748504
			-0.105541	-0.216919
			0.170663	0.00301794
			-0.124196	-0.113293
			0.128037	-0.0909653
			-0.526128	-0.193373
			-0.175641	0.235499
			-0.233646	0.214043
			0.185089	-0.192684
			-0.137715	0.0228237
			-0.159373	-0.0200955
			-0.134467	-0.0341976
			0.223016	-0.0633986
			-0.00283149	0.168307
			-0.0425384	-0.231043
			0.106824	-0.251691
			0.222361	-0.147515
			-0.108282	0.219676
			-0.225949	-0.365786
			-0.143547	-0.220382
			-0.525717	0.036312
			0.135066	0.139778
			-0.290019	-0.136539
			-0.215013	-0.00372976
			-0.17036	-0.0975565
			-0.216486	-0.210694
			0.000325136	-0.0639352
			-0.209145	0.0867675
			-0.37405	-0.209944
			-0.150666	-0.208384
			0.0629241	-0.290798
			0.449379	0.0859991
			-0.0750005	-0.0940233
			0.106533	-0.216252
			-0.0203684	-0.0159498
			0.0944566	-0.120163
			-0.0616608	0.0696242
			-0.123723	-0.147294
			-0.062312	-0.152307
			-0.297882	-0.355522
			-0.0280417	-0.10896
			-0.346542	-0.326279
			-0.121524	-0.131933
			-0.120397	-0.0819045
			0.625138	-0.170621
			-0.234539	-0.250989
			-0.0715082	-0.31136
			-0.410368	0.0179265
			-0.389242	-0.325658
			-0.0647577	-0.110573
			-0.139013	-0.139338
			-0.214976	-0.199848
			0.0316347	-0.233005
			0.198055	0.2064
			0.0651198	0.12387
			-0.269275	0.0422747
			-0.11117	0.0112289
			-0.149581	-0.628541
			0.0557782	-0.196523
			-0.163725	-0.0807263
			-0.165737	-0.0789696
			-0.0629047	-0.271887
			0.131472	0.0473564
			-0.023628	-0.328233
			0.479065	-0.283595
			-0.288081	-0.137448
			0.0353794	-0.219652
			-0.082427	-0.0434967
			-0.367142	-0.15458
			-0.341781	-0.18341
			0.0397617	-0.171915
			-0.0642829	-0.0392593
			-0.117365	-0.189465
			-0.034363	-0.244287
			0.0643637	0.00114604
			-0.245056	0.0880545
			-0.188822	-0.220564
			-0.211216	-0.113999
			0.126941	-0.206306
			-0.23925	-0.177268
			-0.246998	-0.236082
			-0.308373	0.00662329
			-0.0255887	-0.0884002
			-0.123511	0.0133884
			-0.101223	-0.182735
			-0.251457	-0.237324
			-0.384952	-0.0556653
			0.284389	-0.307171
			-0.247392	-0.0380033
			-0.235689	-0.283282
			-0.331045	-0.245859
			0.0969679	0.0817117
			0.111794	-0.283766
			-0.261521	-0.131566
			-0.287983	-0.0893991
			0.0239248	-0.490931
			-0.128028	-0.327101
			-0.276368	0.0521721
			-0.112925	-0.192944
			0.0239402	-0.246535
			-0.242017	-0.263528
			-0.292438	-0.417995
			-0.0589307	-0.204916
			-0.101226	-0.288228
			-0.506088	0.00779196
			-0.199024	-0.282667
			-0.302851	-0.158837
			-0.370087	0.29989
			0.0600286	-0.0408754
			-0.227268	-0.350934
			-0.278761	0.145536
			-0.210605	-0.140947
			-0.129243	0.184981
			-0.0230535	-0.268287
			-0.211138	-0.176319
			-0.433345	-0.141997
			-0.196548	-0.192662
			-0.0955731	-0.370216
			0.147101	-0.183893
			-0.244971	-0.110765
			-0.214607	-0.112946
			-0.239657	-0.191137
			0.187072	0.0161686
			-0.163929	0.0860664
			-0.0662687	-0.106895
			0.0410277	0.00497225
			-0.0507333	0.315305
			0.0418788	-0.175257
			-0.0321932	-0.332331
			0.253087	-0.0963306
			-0.0950887	-0.0154018
			-0.383262	-0.106838
			-0.157104	-0.156748
			-0.427246	-0.229432
			0.375472	-0.513664
			0.33506	0.214761
			-0.256963	-0.172712
			-0.201634	-0.0995089
			0.0701482	-0.0943733
			-0.11637	-0.048087
			-0.289745	-0.244284
			-0.0294687	-0.165635
			-0.135544	-0.16429
			0.0341419	-0.0674645
			-0.179078	-0.092905
			-0.0938712	-0.305542
			-0.189389	-0.285467
			-0.3336	-0.0477325
			-0.301447	-0.187997
			-0.00296116	-0.107285
			-0.124092	-0.210649
			-0.18327	-0.196843
			-0.137859	-0.247198
			-0.00521601	-0.0286434
			-0.101378	-0.338345
			-0.128255	-0.068295
			-0.206774	-0.151744
			-0.182488	-0.190557
			-0.419108	-0.43214
			0.102722	-0.0632906
			-0.227297	0.692952
			0.167289	0.209258
			-0.253606	0.0695277
			-0.162298	-0.128438
			-0.317446	-0.0912021
			-0.134744	-0.304875
			-0.227831	0.039177
			-0.208342	-0.152273
			-0.157837	-0.125168
			0.112942	0.0103834
			-0.0833637	-0.166777
			-0.164823	-0.0369335
			-0.107082	-0.0183558
			-0.00507839	-0.500099
			-0.151186	-0.410478
			-0.0021937	-0.00748195
			0.0647726	-0.20686
			-0.112586	-0.181399
			0.0689113	0.000381204
			-0.431746	-0.438723
			-0.402391	-0.14231
			-0.144712	-0.364396
			-0.164915	-0.321829
			-0.211994	-0.0120534
			-0.238765	-0.0221308
			-0.237991	-0.0758433
			-0.0363955	-0.128315
			-0.264325	-0.212909
			-0.110645	0.0659438
			-0.161968	-0.221587
			-0.128645	-0.0142979
			-0.433877	-0.302834
			-0.287728	-0.061101
			-0.193148	-0.303483
			0.264701	-0.146527
			0.0106583	-0.215448
			-0.163645	-0.0659003
			-0.147414	-0.0832567
			-0.0577067	-0.0840973
			-0.0667167	-0.0893363
			-0.115847	0.0333327
			0.560307	-0.00648667
			-0.550175	-0.35834
			0.0520824	-0.196234
			0.121169	-0.317381
			-0.264752	-0.1344
			-0.204558	-0.26845
			-0.149495	0.282283
			0.0576126	0.0171868
			-0.329832	-0.01913
			0.00429269	-0.228468
			0.262306	-0.245536
			0.185685	-0.165555
			-0.340935	-0.164026
			-0.0203941	0.026073
			-0.341772	-0.385994
			0.0948719	-0.18298
			0.107301	-0.162641
			-0.135847	-0.229329
			-0.285602	-0.00695488
			-0.22375	-0.244394
			-0.287976	-0.310404
			-0.0493563	-0.0580432
			-0.0421299	-0.129803
			-0.11304	-0.216649
			-0.318187	0.0522356
			-0.268263	-0.132725
			-0.289756	-0.111686
			0.198968	-0.14009
			-0.448004	-0.111833
			-0.192305	-0.174403
			-0.193317	-0.196278
			-0.163672	-0.17273
			-0.109958	-0.122865
			-0.101233	-0.105187
			-0.191409	-0.276646
			-0.183622	-0.268058
			-0.0326831	0.356111
			-0.104458	-0.210342
			-0.114065	-0.226815
			-0.0983346	-0.123107
			-0.240456	-0.192523
			-0.242964	-0.128867
			-0.244608	-0.116991
			-0.256797	-0.205907
			-0.197778	-0.219941
			-0.412666	-0.285248
			-0.458947	-0.267888
			0.112105	0.0598413
			-0.232993	0.143261
			-0.362546	0.425093
			-0.408259	-0.0593805
			-0.2314	-0.307929
			-0.11873	0.167236
			-0.436214	-0.0804221
			-0.174671	-0.149215
			-0.184703	-0.158357
			-0.177689	-0.216522
			-0.221881	4.14209e-05
			0.0161726	-0.0767903
			-0.0464653	-0.504503
			-0.670333	-0.217784
			-0.217859	-0.1339
			-0.233152	-0.18671
			-0.0501611	-0.113676
			0.0436788	-0.0346648
			-0.377215	-0.086155
			0.053164	-0.00316361
			-0.12087	0.11664
			0.0253355	0.355978
			0.335452	-0.129443
			-0.386146	-0.147605
			0.245064	-0.0143354
			0.0685023	-0.112001
			0.131906	-0.145098
			-0.441824	-0.129996
			-0.553338	-0.181202
			0.264417	0.260291
			-0.334962	0.151761
			-0.254848	0.0212286
			-0.0335693	-0.136082
			-0.287485	-0.183826
			-0.0413944	-0.0440103
			-0.154766	-0.0874665
			-0.397881	-0.000509476
			-0.228384	-0.25959
			-0.178896	-0.0443245
			-0.117589	0.0883503
			-0.188848	0.589257
			-0.293796	-0.0413017
			-0.169088	-0.350672
			-0.189757	0.162172
			-0.240892	-0.285555
			-0.277475	-0.211676
			-0.102435	-0.384794
			-0.00746658	0.0363337
			-0.302928	-0.169939
			-0.346321	-0.018642
			0.339144	-0.160264
			-0.27073	-0.226095
			0.0289568	-0.438421
			0.098301	-0.0581444
			0.0609456	-0.277227
			0.0362321	-0.177143
			-0.464653	-0.181994
			0.0623497	-0.268605
			-0.253997	-0.20211
			-0.598611	-0.259337
			0.0844142	-0.381646
			-0.235711	-0.0912138
			-0.0116504	-0.128336
			-0.0696025	-0.0953388
			0.0428448	-0.13175
			-0.0901183	-0.0878871
			-0.154963	-0.172841
			-0.0170876	-0.0247387
			0.198949	-0.149909
			-0.0908623	-0.203392
			-0.182385	-0.291287
			0.0511471	-0.272117
			0.230989	-0.304629
			0.237367	0.0564258
			0.325299	-0.290653
			0.101219	-0.376151
			-0.34858	-0.376844
			-0.292968	-0.239618
			-0.13668	-0.354326
			-0.143121	-0.254171
			-0.332747	-0.0725551
			-0.229785	-0.356803
			-0.415787	-0.0428942
			-0.276544	-0.327692
			-0.210258	0.532787
			-0.304311	0.418026
			0.247187	-0.138118
			-0.23943	-0.0995271
			-0.0636665	-0.13492
			-0.244789	-0.0922514
			-0.241308	-0.218805
			-0.271951	-0.306644
			-0.165394	-0.306104
			-0.0787422	0.0274047
			-0.112541	-0.0604805
			0.0425339	-0.112994
			-0.0637896	-0.166129
			0.195243	-0.0462602
			-0.484192	-0.121241
			-0.34913	-0.158738
			-0.537881	-0.128781
			-0.229435	-0.0866291
			-0.262104	-0.229598
			-0.161974	-0.188326
			-0.406354	0.00801478
			0.408249	-0.102409
			-0.360601	-0.0663782
			-0.337098	-0.259269
			-0.223513	0.508053
			-0.103512	-0.33712
			-0.171422	0.0255449
			-0.000807508	0.425938
			-0.142569	0.00884471
			-0.115964	-0.12767
			-0.256395	-0.0986607
			-0.0791711	0.635957
			-0.191739	0.255043
			-0.0880399	0.177113
			0.376888	0.0196983
			-0.226392	-0.280152
			-0.504571	0.00812809
			-0.268846	-0.107127
			-0.0172963	0.205342
			0.0259029	-0.27792
			0.36405	-0.134154
			-0.104617	-0.0472134
			-0.317241	-0.214606
			-0.132752	0.0130182
			-0.260985	0.150299
			-0.224708	0.00504031
			-0.224458	-0.185944
			-0.331376	-0.214703
			-0.0577811	-0.218574
			-0.189542	-0.314369
			-0.0803907	0.0506632
			-0.322835	-0.11287
			-0.0153115	-0.269642
			-0.0413892	-0.192267
			-0.0283725	-0.3681
			-0.220977	-0.346886
			-0.287143	-0.272145
			-0.211697	0.263443
			-0.257033	-0.421641
			-0.221324	-0.0927943
			-0.225573	-0.911663
			0.0492206	-0.427568
			-0.374823	-0.145004
			-0.75069	-0.202535
			0.302481	-0.170537
			-0.13835	-0.339835
			-0.0651714	-0.357033
			-0.0826981	-0.411817
			-0.119673	-0.258559
			-0.231449	-0.0371174
			0.315498	0.247564
			-0.00639549	-0.14243
			-0.381332	-0.287126
			-0.0763336	-0.13274
			0.245825	-0.223514
			0.0554899	-0.0705207
			0.446879	-0.15262
			0.398752	-0.151384
			0.0152642	0.305433
			-0.245013	0.0693459
			-0.0165577	-0.0555711
			0.00447925	-0.383793
			-0.266492	-0.336137
				0.370201
				-0.108886
				-0.242492
				-0.192311
				0.0748915
				0.0708747
				0.335619
				-0.118308
				-0.0294106
				-0.0754693
				-0.0802304
				-0.134342
				-0.21128
				-0.297045
				-0.137063
				-0.138366
				0.217073
				-0.308361
				-0.226844
				-0.0379229
				0.0937256
				0.00868604
				-0.194286
				-0.198305
				-0.137237
				-0.346909
				-0.463735
				-0.422136
				-0.276681
				-0.728829
				-0.291672
				-0.274129
				-0.112333
				-0.23781
				-0.32425
				0.243742
				-0.210464
				-0.0387801
				-0.193938
				-0.0667899
				-0.15354
				0.364642
				-0.12543
				-0.158866
				0.537321
				-0.0492376
				-0.101841
				-0.140377
				-0.0521372
				-0.0824156
				0.227114
				-0.0627706
				0.238892
				-0.0526502
				-0.236388
				-0.169653
				-0.331741
				-0.130465
				0.018546
				-0.0496023
				-0.378142
				-0.219217
				-0.104528
				0.101174
				-0.140392
				-0.198051
				-0.173598
				0.011554
				-0.243719
				-0.299587
				-0.317047
				-0.156966
				-0.157813
				-0.0584197
				-0.34267
				0.0899187
				0.0560411
				-0.0882903
				-0.0689085
				-0.244746
				-0.0977654
				-0.300618
				-0.109465
				-0.338143
				-0.228932
				-0.226164
				0.287212
				-0.398388
				0.534698
				-0.369328
				-0.286037
				-0.347565
				-0.143294
				0.00823257
				-0.182259
				0.0503449
				-0.0924812
				-0.00701809
				0.232401
				-0.108402
				-0.303898
				-0.316878
				-0.111905
				-0.0582282
				-0.0301058
				-0.257952
				-0.152748
				0.363702
				-0.356324
				-0.187715
				-0.255374
				-0.194069
				-0.0714249
				-0.252197
				0.18619
				-0.180715
				-0.139602
				-0.200229
				-0.291197
				-0.216159
				-0.0493163
				-0.141746
				-0.112755
				-0.127524
				-0.0028841
				-0.146868
				-0.0951069
				-0.203211
				-0.558566
				-0.115564
				0.035852
				-0.150829
				-0.113834
				0.0375285
				-0.166287
				-0.310105
				-0.243363
				-0.00141535
				-0.242178
				-0.201747
				-0.123018
				0.0632226
				-0.143743
				-0.268194
				-0.0816279
				-0.13881
				-0.0419964
				-0.11598
				-0.0143529
				-0.0240138
				-0.166502
				-0.202883
				-0.245874
				-0.0459043
				-0.124723
