# Supplementary material for: Multiple time-scales of decision-making in the hippocampus and prefrontal cortex
Source: eLife. 2021 Mar 8;10:e66227. doi: 10.7554/eLife.66227 (PMC7993991; doi:10.7554/eLife.66227)
Supplement: Figure 7—source data 1. [file elife-66227-fig7-data1.xlsx]

## Sheet: Correct_vs_Incorect_BehavioralT
CA1					PFC
OUT correct	OUT incorrect	IN correct	IN incorrect		OUT correct	OUT incorrect	IN correct	IN incorrect
0.741044	0.540107	0.735714	0.697368		0.622869	0.613379	0.712281	0.619883
0.61225	0.79364	0.742777	0.66983		0.602202	0.623742	0.685484	0.688656
0.60972	0.640428	0.71996	0.577309		0.658434	0.546838	0.6191	0.658333
0.617188	0.535183	0.747058	0.864035		0.606018	0.510587	0.70659	0.713462
0.716878	0.53019	0.818053	0.75		0.619392	0.556989	0.682614	0.7
0.65218	0.553922	0.793212	0.709524		0.600885	0.540711	0.689255	0.549331
0.666674	0.634236	0.779458	0.810968		0.584602	0.603552	0.67734	0.550323
0.644965	0.625489	0.89935	0.857143		0.592727	0.634514	0.713366	0.885714
0.619624	0.723475	0.820016	0.684874		0.738235	0.725758	0.644875	0.571569
0.634396	0.690823	0.721224	0.847249		0.610714	0.591925	0.698509	0.687873
0.585106	0.703027	0.73945	0.762755		0.61976	0.523492	0.714575	0.628293
0.676912	0.513303	0.809091	0.887626		0.639879	0.498005	0.68474	0.691498
0.618574	0.614375	0.778202	0.833333		0.608947	0.55142	0.694079	0.694444
0.646369	0.570887	0.794347	0.794421		0.557466	0.554389	0.691928	0.6875
0.701873	0.563668	0.879037	0.825		0.649595	0.570826	0.686349	0.661765
0.656454	0.56633	0.890798	0.90625		0.657641	0.616644	0.671568	0.765625
0.744619	0.780012	0.720833	0.551587		0.712927	0.723776	0.705524	0.528958
0.66357	0.654274	0.769355	0.728175		0.608314	0.593246	0.732527	0.688492
0.613325	0.541847	0.738427	0.803571		0.638637	0.605048	0.700595	0.843786
0.655822	0.632529	0.785844	0.875736		0.588139	0.530284	0.678528	0.736543
0.695922	0.61445	0.817308	0.817857		0.629589	0.664888	0.719745	0.783193
0.613214	0.617424	0.837537	0.867589		0.606083	0.528911	0.666358	0.784515
0.716947	0.628432	0.891807	0.886905		0.643301	0.629884	0.668148	0.848571
0.668485	0.63203	0.871083	0.892573		0.561346	0.622007	0.620592	0.766788
0.783919	0.822222	0.691667	0.644048		0.712721	0.733333	0.693122	0.794444
0.72574	0.51535	0.736862	0.757518		0.560722	0.58034	0.630738	0.652351
0.627395	0.576157	0.803571	0.805845		0.634256	0.581681	0.66825	0.70544
0.602709	0.582093	0.782554	0.847712		0.577948	0.536553	0.690438	0.753763
0.688365	0.556128	0.829921	0.85		0.612997	0.552721	0.728044	0.7875
0.633084	0.604216	0.845272	0.835668		0.588977	0.525355	0.687417	0.804418
0.645886	0.592408	0.824959	0.757168		0.65991	0.577325	0.747477	0.699653
0.675709	0.571978	0.889014	0.819444		0.619654	0.592466	0.698163	0.691667
0.777412	0.660461	0.860483	0.738453		0.560746	0.650709	0.771691	0.676155
0.627172	0.61625	0.733654	0.717199		0.605349	0.637452	0.722646	0.632314
0.620138	0.507011	0.825148	0.817971		0.566429	0.605834	0.682266	0.695145
0.627874	0.622602	0.820605	0.835349		0.598129	0.477548	0.765425	0.743721
0.720853	0.566154	0.832094	0.941092		0.605981	0.458017	0.69511	0.891667
0.652541	0.654964	0.881379	0.668269		0.591535	0.504557	0.668956	0.777588
0.671678	0.600952	0.862574	0.82807		0.646026	0.515604	0.724943	0.682065
0.689592	0.696185	0.862631	0.8125		0.662347	0.645338	0.684886	0.814063
0.759783	0.751604	0.696643	0.599839		0.678612	0.675401	0.569408	0.696347
0.633227	0.670068	0.743859	0.685698		0.673089	0.628004	0.63389	0.706072
0.671208	0.647396	0.824012	0.775681		0.561582	0.58346	0.718006	0.702786
0.647309	0.558333	0.836674	0.866224		0.569047	0.542239	0.768486	0.760648
0.661563	0.588531	0.847717	0.857143		0.617953	0.574473	0.712283	0.793333
0.684327	0.693304	0.85283	0.862353		0.617339	0.621429	0.692947	0.852222
0.699025	0.647789	0.841286	0.851633		0.631309	0.594021	0.708991	0.737685
0.667423	0.688045	0.840824	0.923214		0.616279	0.634816	0.723601	0.747369
0.672843	0.652597	0.753378	0.693938		0.653513	0.57197	0.735989	0.655155
0.713591	0.586842	0.727615	0.706122		0.647436	0.565823	0.72184	0.693271
0.654679	0.602052	0.830485	0.798757		0.60821	0.555672	0.73231	0.749812
0.662307	0.623656	0.853536	0.872559		0.629504	0.463211	0.792916	0.800733
0.754807	0.622122	0.8748	0.810847		0.627811	0.489744	0.762891	0.776273
0.724771	0.62034	0.925615	0.890083		0.658242	0.624008	0.737047	0.721643
0.774777	0.56546	0.855613	0.942156		0.634112	0.691758	0.738922	0.666459
0.733665	0.725692	0.878435	0.849686		0.607216	0.723039	0.767133	0.766577
0.601906	0.557366	0.73771	0.735237		0.714921	0.565469	0.642279	0.560655
0.604532	0.615022	0.706787	0.686287		0.604078	0.586203	0.712057	0.623672
0.682002	0.616909	0.828046	0.721579		0.637358	0.60696	0.754743	0.701946
0.679999	0.662302	0.893474	0.969048		0.598642	0.43349	0.693484	0.709524
0.772105	0.719014	0.861514	0.992308		0.680721	0.622874	0.737177	0.744912
0.692018	0.626683	0.823867	0.799413		0.617808	0.602434	0.709056	0.716776
0.734197	0.646324	0.77878	0.713098		0.705721	0.599114	0.644981	0.778195
0.73403	0.68322	0.796514	0.860465		0.578912	0.604225	0.692695	0.77907
0.618285	0.658544	0.619785	0.627145		0.561669	0.643446	0.684211	0.762088
0.674056	0.617696	0.732307	0.664553		0.619894	0.623333	0.711538	0.673432
0.767347	0.657971	0.803399	0.736531		0.615497	0.583508	0.679286	0.743017
0.736837	0.686516	0.823028	0.834711		0.643065	0.628185	0.776498	0.687349
0.764989	0.598596	0.739995	0.770612		0.627642	0.574167	0.724886	0.741918
0.780644	0.773046	0.808402	0.819168		0.654499	0.625739	0.726404	0.724843
0.817869	0.766026	0.799349	0.835722		0.660279	0.686302	0.698402	0.811392
0.79295	0.649953	0.790502	0.722926		0.677125	0.680937	0.655261	0.765459
0.643358	0.718058	0.666736	0.657502		0.642996	0.564003	0.607766	0.557631
0.793273	0.797725	0.777988	0.680147		0.700619	0.681473	0.631259	0.642812
0.881858	0.836261	0.84075	0.834088		0.697948	0.705965	0.76356	0.722244
0.833794	0.915001	0.837168	0.870214		0.665445	0.683587	0.762395	0.662271
0.890047	0.851801	0.837487	0.870163		0.697621	0.694481	0.752812	0.748094
0.860177	0.88549	0.844428	0.89045		0.719004	0.663517	0.76065	0.752652
0.881989	0.849107	0.849959	0.887051		0.78327	0.767057	0.715705	0.717925
0.891934	0.864752	0.864582	0.820496		0.72099	0.784749	0.713132	0.799778
0.769619	0.835555	0.741469	0.747549		0.696471	0.736493	0.714286	0.767087
0.836986	0.868495	0.815313	0.863703		0.74391	0.749888	0.740986	0.756831
0.915241	0.861511	0.85103	0.924638		0.726337	0.797059	0.754878	0.762402
0.893961	0.911942	0.934146	0.954489		0.724828	0.673891	0.808806	0.731383
0.90966	0.911942	0.925424	0.952621		0.743592	0.770408	0.798032	0.847619
0.897513	0.848927	0.926743	0.901232		0.762216	0.810827	0.758257	0.742002
0.916871	0.960364	0.905127	0.931104		0.736883	0.808967	0.769703	0.794951
0.899859	0.855584	0.873392	0.860611		0.687996	0.806754	0.70751	0.745369
0.845579	0.810633	0.805428	0.80367		0.752776	0.704301	0.691445	0.674675
0.909014	0.886486	0.866089	0.864294		0.776858	0.766968	0.783638	0.67857
0.909817	0.90702	0.876342	0.935429		0.737392	0.784199	0.769129	0.821369
0.93444	0.924379	0.924044	0.936948		0.77761	0.764286	0.797471	0.729407
0.932389	0.951087	0.92322	0.951456		0.781597	0.762755	0.735956	0.843969
0.944264	0.882576	0.929453	0.853453		0.763759	0.865732	0.746109	0.74575
0.927701	0.907126	0.908074	0.913368		0.770572	0.848072	0.767148	0.837758
0.895761	0.930392	0.858283	0.940728		0.754073	0.811615	0.722975	0.834344
0.807151	0.91829	0.880964	0.860989		0.774504	0.774725	0.737451	0.598109
0.890328	0.958333	0.867947	0.82625		0.771728	0.742489	0.693455	0.732026
0.936966	0.926729	0.854255	0.858031		0.825494	0.812622	0.693688	0.710823
0.919974	0.934182	0.879884	0.956141		0.815128	0.762387	0.732721	0.636953
0.953707	0.936417	0.922838	0.942918		0.823294	0.870855	0.798575	0.894086
0.936216	0.924525	0.92568	0.876817		0.753515	0.882234	0.751518	0.774138
0.914525	0.956658	0.894725	0.927831		0.805773	0.877415	0.760606	0.776473
0.876457	0.913283	0.881353	0.882163		0.750595	0.841374	0.773313	0.783335
0.740777	0.856053	0.897487	0.772205		0.730074	0.770968	0.708584	0.651535
0.866092	0.817487	0.928459	0.867492		0.798892	0.778718	0.756909	0.608582
0.905118	0.910823	0.913582	0.934041		0.775157	0.840347	0.759033	0.849176
0.841465	0.880918	0.882777	0.965368		0.758321	0.71738	0.786745	0.770959
0.908683	0.957516	0.940519	0.978012		0.753898	0.587821	0.77002	0.906562
0.92146	0.933292	0.925418	0.927211		0.67342	0.763326	0.729687	0.644762
0.916202	0.922908	0.931335	0.94607		0.724852	0.795856	0.768885	0.838767
0.874275	0.918229	0.842404	0.949587		0.677847	0.704586	0.710508	0.789278
0.821965	0.848837	0.873571	0.90483		0.694246	0.625731	0.706316	0.57932
0.819788	0.786381	0.878557	0.89567		0.74178	0.770588	0.773862	0.749423
0.934552	0.920494	0.959166	0.957928		0.751652	0.721862	0.807876	0.795663
0.948193	0.956189	0.945675	0.955935		0.7255	0.775123	0.771859	0.778935
0.941474	0.973404	0.947454	0.983516		0.790274	0.778258	0.794121	0.891255
0.918623	0.889877	0.942293	0.984848		0.741324	0.808529	0.753253	0.804036
0.927969	0.980263	0.93019	0.985294		0.785882	0.910256	0.765446	0.882353
0.885722	0.93605	0.895489	0.92437		0.738171	0.795662	0.716282	0.832774
0.862573	0.91511	0.931955	0.851282		0.627347	0.724585	0.670101	0.559319
0.927546	0.894913	0.903435	0.913576		0.787496	0.737281	0.746604	0.77201
0.941579	0.972673	0.962783	0.963846		0.746626	0.709606	0.779314	0.79127
0.950243	0.942127	0.962346	0.992754		0.766788	0.713876	0.754446	0.809932
0.944064	0.968354	0.946937	0.95093		0.775605	0.816667	0.788153	0.770787
0.939254	0.972188	0.949541	0.964794		0.761782	0.753394	0.785099	0.735672
0.938305	0.983333	0.94587	0.987179		0.759973	0.880423	0.736347	0.880247
0.914273	0.940649	0.930898	0.961763		0.734601	0.796285	0.745655	0.839808
0.891646	0.889834	0.93561	0.928205		0.654494	0.779445	0.702381	0.788531
0.954668	0.925811	0.915051	0.943153		0.767461	0.766278	0.716528	0.70362
0.965726	0.989583	0.980175	0.913562		0.72837	0.741348	0.773445	0.806486
0.959898	0.97619	0.952676	0.961367		0.717092	0.735925	0.801368	0.715866
0.953138	0.992857	0.919229	0.961782		0.768384	0.796429	0.755791	0.796296
0.958211	0.913061	0.9446	0.965977		0.763548	0.753788	0.759906	0.824436
0.952196	0.917702	0.959847	0.920748		0.747599	0.783333	0.731268	0.787255
0.920566	0.913905	0.935047	0.972716		0.672568	0.810562	0.756274	0.799984
0.949074	0.930233	0.97973	0.968085		0.659593	0.684441	0.653333	0.680417
0.984536	0.945058	0.940284	0.892323		0.713514	0.694444	0.707821	0.639912
0.963057	0.941477	0.934209	0.913874		0.755017	0.735173	0.74303	0.790464
0.96874	0.966106	0.950229	0.947081		0.712053	0.630532	0.77477	0.729839
0.946514	0.947464	0.955285	0.946699		0.724977	0.670068	0.718666	0.801772
0.969328	0.92458	0.93541	0.924215		0.694591	0.738593	0.74818	0.690541
0.975	0.895833	0.937657	0.930737		0.756784	0.735372	0.754708	0.787662
0.936505	0.915233	0.933421	0.949026		0.71416	0.821039	0.718281	0.820479
0.927911	0.907018	0.934843	0.891766		0.697143	0.618421	0.677266	0.541091
0.983516	0.92498	0.933595	0.92037		0.758449	0.72807	0.704844	0.712323
0.944689	0.985714	0.933224	0.911839		0.744251	0.679919	0.73592	0.729519
0.979459	0.992537	0.954764	0.955882		0.743316	0.710344	0.721017	0.706862
0.976452	0.900895	0.941496	0.985149		0.784769	0.739953	0.715977	0.747126
0.956319	0.988372	0.961451	0.930556		0.700494	0.762559	0.693441	0.811905
0.954173	0.957143	0.91253	0.982353		0.743415	0.815789	0.78013	0.745378
0.952873	0.982315	0.895019	0.846557		0.749296	0.814562	0.703344	0.806388
0.942264	0.978261	0.897959	0.784569		0.770188	0.748904	0.576597	0.720734
0.94692	0.889923	0.928397	0.944639		0.750545	0.862745	0.724439	0.666702
0.969059	0.979489	0.910278	0.930891		0.764232	0.726621	0.682312	0.728607
0.974794	0.987179	0.963574	0.954296		0.774066	0.78683	0.724772	0.715151
0.983444	0.972222	0.894083	0.900929		0.743417	0.781654	0.704569	0.718545
0.962102	0.966545	0.926939	0.93631		0.689095	0.850484	0.685787	0.642719
0.968514	0.942857	0.92515	0.943261		0.681821	0.760442	0.692079	0.825746
0.942821	0.983871	0.912328	0.831201		0.699283	0.826775	0.673165	0.73291
0.871366	0.940351	0.90625	0.758864		0.630661	0.73913	0.730082	0.522924
0.952606	0.904167	0.908191	0.927604		0.702484	0.888482	0.659761	0.620857
0.951166	1	0.914875	0.954523		0.75	0.760854	0.730883	0.646756
0.951116	0.9875	0.94445	0.910925		0.75264	0.722431	0.678046	0.681247
0.971138	0.973684	0.901212	0.899355		0.754107	0.708333	0.692962	0.726007
0.933241	0.986842	0.898081	0.914533		0.732354	0.758373	0.721859	0.639937
0.945596	0.94281	0.89103	0.893333		0.742032	0.67042	0.734973	0.772624
0.968664	1	0.907387	0.964286		0.782918	0.77037	0.674987	0.793605
0.872318	0.975	0.947826	0.851613		0.705897	0.589286	0.654386	0.589901
0.948263	0.878049	0.931277	0.879202		0.757206	0.869444	0.694958	0.552203
0.924144	1	0.866764	0.936497		0.630719	0.944444	0.726371	0.679365
0.946809	0.982143	0.903228	0.927155		0.661067	0.673775	0.625831	0.695446
0.939537	1	0.894966	0.75641		0.775518	0.692308	0.74431	0.785714
0.910063	0.928571	0.888769	0.833333		0.686111	0.660714	0.566098	0.25
0.896672	0.875	0.838851	0.971429		0.683558	0.833333	0.643466	0.822222
0.948276	1	0.941176	1		0.685484	0.541667	0.775105	0.75
*Data are decoding accurcy at the behavioral timescale per location bin per session
